# Supplementary material for: Detection of R.1 lineage severe acute respiratory syndrome coronavirus 2 (SARS-CoV-2) with spike protein W152L/E484K/G769V mutations in Japan
Source: PubMed Central journal article supplement (PMC8238201; doi:10.1371/journal.ppat.1009619), 2021-06-07
Supplement: ppat.1009619.s003.pdf [file ppat.1009619.s003.pdf]

We gratefully acknowledge the following Authors from the Originating laboratories responsible for obtaining the specimens, as well as the Submitting laboratories where the genome data were generated and shared via GISAID, on which this research is based.

All Submitters of data may be contacted directly via [www.gisaid.org](http://www.gisaid.org)

Authors are sorted alphabetically.

| Accession ID                                                                                                                                            | Originating Laboratory                                                                                   | Submitting Laboratory                                                                                           | Authors                                                                                                                                                                                                                                                                                                                                                       |
|---------------------------------------------------------------------------------------------------------------------------------------------------------|----------------------------------------------------------------------------------------------------------|-----------------------------------------------------------------------------------------------------------------|---------------------------------------------------------------------------------------------------------------------------------------------------------------------------------------------------------------------------------------------------------------------------------------------------------------------------------------------------------------|
| EPI_ISL_1009535, EPI_ISL_1009564<br>EPI_ISL_1010709                                                                                                     | Erie County Public Health (ECPHL)<br>New South Wales Health Pathology Royal Prince Alfred Hospital       | University at Buffalo Genomics and Bioinformatics Core<br>Microbiology RPAH                                     | Jonathan Bard, Natalie Lamb, Alyssa Pohlman, Brandon Marzullo, Amanda Boccolucci, Norma Nowak, Donald Yergeau, Jennifer Surtees<br>Foster, C.; Au, J.; Ruiz Silva, M.; Deveson, I.; Bull, R.; Van Hal, S.; Rawlinson, W.                                                                                                                                      |
| EPI_ISL_1015618<br>EPI_ISL_1016417                                                                                                                      | Maryland Public Health Laboratory<br>ALBANY MEDICAL CENTER HOSPITAL CLINICAL LABORATORIES                | Maryland Public Health Laboratory<br>Wadsworth Center, New York State Department of Health                      | Maryland Department of Health Laboratories Administration<br>Kirsten St. George, Daryl M. Lamson, Alexis Russel, Matthew Shudt, Melissa A Leisner, Jonathan Plitnick, Navjot Singh, John Kelly, Erasmus Schneider, Erica Lasek-Nesselquist                                                                                                                    |
| EPI_ISL_1018072, EPI_ISL_1018081, EPI_ISL_1018098<br>EPI_ISL_1020347                                                                                    | Immunology, Noguchi Memorial Institute for Medical Research<br>MEPHI, Aix Marseille University           | Immunology, Noguchi Memorial Institute for Medical Research<br>MEPHI, Aix Marseille University                  | Adu,B., Egyir,B., Kumordjie,S., Agbodzi,B., Yeboah,C., Mohktar,Q., Oteng,F., Owusu-Nyantakyi,C., Asare,K.M., Appiah-Kubi,J., Adusei-Poku,M.A., Odoom,J.K., Ampofo,W.K., Bonney,J.K.<br>Anthony LEVASSEUR                                                                                                                                                      |
| EPI_ISL_1035598, EPI_ISL_1035785                                                                                                                        | Dutch COVID-19 response team                                                                             | National Institute for Public Health and the Environment (RIVM)                                                 | Adam Meijer, Harry Vennema, Dirk Eggink, Jeroen Cremer, Sharon van den Brink, Bas van der Veer, AnneMarie van den Brandt, Florian Zwagemaker, Dennis Schmitz, Chantal Reusken, on behalf of the national COVID-19 response team                                                                                                                               |
| EPI_ISL_1036299, EPI_ISL_1036300, EPI_ISL_1036301, EPI_ISL_1036302<br>EPI_ISL_1036609                                                                   | Johns Hopkins Hospital Department of Pathology<br>Department of Clinical Microbiology                    | Johns Hopkins Hospital Department of Pathology<br>GIGA Medical Genomics                                         | C. Paul Morris, Chun Huai Luo, Adannaya Amadi, Matthew Schwartz, Nicholas Gallagher, Heba H. Mostafa<br>Keith Durkin, Maria Artesi, Sébastien Bontems, Raphaël Boreux, Bouchra Boujemla, Nathalie Renotte, Cécile Meex, Pierrette Melin, Marie-Pierre Hayette, Vincent Bours                                                                                  |
| EPI_ISL_1040514, EPI_ISL_1040515, EPI_ISL_1040516, EPI_ISL_1040517, EPI_ISL_1040518, EPI_ISL_1040534<br>EPI_ISL_1040885                                 | University of Liège COVID-19 testing center<br>NYU Langone Health                                        | GIGA Medical Genomics<br>Departments of Pathology and Medicine, New York University School of Medicine          | Keith Durkin, Maria Artesi, Bouchra Boujemla, Nathalie Renotte, Cécile Meex, Sébastien Bontems, Fabrice Bureau, Laurent Gillet, Wouter Coppieters, Marie-Pierre Hayette, Vincent Bours<br>Adriana Heguy, Dacia Dimartino, Emily Guzman, Christian Marier, Peter Meyn, Sitharam Ramaswami, Gael Westby, Paul Zappile, Yutong Zhang, Paolo Cotzia, Guiqing Wang |
| EPI_ISL_1041417, EPI_ISL_1041420, EPI_ISL_1041478, EPI_ISL_1041479, EPI_ISL_1041489, EPI_ISL_1041669, EPI_ISL_1041687, EPI_ISL_1041690                  | Pandemic Response Lab - NYC                                                                              | Pandemic Response Lab, R&D                                                                                      | Henry Lee, Michael Hammerling, Melissa Hopkins, Cybill del Castillo, William Ward, Pradeep Bugga, Haiping Hao, Jon Laurent                                                                                                                                                                                                                                    |
| EPI_ISL_1041945, EPI_ISL_1041946, EPI_ISL_1041947, EPI_ISL_1041948                                                                                      | Tokyo Metropolitan Institute of Public Health                                                            | Tokyo Metropolitan Institute of Public Health                                                                   | Masaki Hayashi, Takako Yamazaki, Ayano Hotta, Souichi Yoshikawa, Tomoki Igarashi, Kayo Hagino, Maki Kanda, Kenji Iida, Mami Nagashima, Takushi Fujiwara, Takashi Chiba, Kenji Sadamasu                                                                                                                                                                        |
| EPI_ISL_1042980, EPI_ISL_1043085, EPI_ISL_1043099                                                                                                       | Lighthouse Lab in Alderley Park                                                                          | Wellcome Sanger Institute for the COVID-19 Genomics UK (COG-UK) Consortium                                      | Jacquelyn Wynn, Mairead Hyland, The Lighthouse Lab in Alderley Park and Alex Alderton, Roberto Amato, Jeffrey Barrett, Sonia Goncalves, Ewan Harrison, David K. Jackson, Ian Johnston, Dominic Kwiatkowski, Cordelia Langford, John Sillitoe on behalf of the Wellcome Sanger Institute COVID-19 Surveillance Team                                            |
| EPI_ISL_1065857                                                                                                                                         | Department of Virus and Microbiological Special Diagnostics, Statens Serum Institut, Copenhagen, Denmark | Aalborg University                                                                                              | Danish Covid-19 Genome Consortium                                                                                                                                                                                                                                                                                                                             |
| EPI_ISL_1072166                                                                                                                                         | Lighthouse Lab in Alderley Park                                                                          | Wellcome Sanger Institute for the COVID-19 Genomics UK (COG-UK) Consortium                                      | Jacquelyn Wynn, Mairead Hyland, The Lighthouse Lab in Alderley Park and Alex Alderton, Roberto Amato, Jeffrey Barrett, Sonia Goncalves, Ewan Harrison, David K. Jackson, Ian Johnston, Dominic Kwiatkowski, Cordelia Langford, John Sillitoe on behalf of the Wellcome Sanger Institute COVID-19 Surveillance Team                                            |
| EPI_ISL_1072370                                                                                                                                         | Lighthouse Lab in Milton Keynes                                                                          | Wellcome Sanger Institute for the COVID-19 Genomics UK (COG-UK) Consortium                                      | The Lighthouse Lab in Milton Keynes and Alex Alderton, Roberto Amato, Jeffrey Barrett, Sonia Goncalves, Ewan Harrison, David K. Jackson, Ian Johnston, Dominic Kwiatkowski, Cordelia Langford, John Sillitoe on behalf of the Wellcome Sanger Institute COVID-19 Surveillance Team                                                                            |
| EPI_ISL_1072967, EPI_ISL_1072968, EPI_ISL_1072972, EPI_ISL_1072973, EPI_ISL_1072977, EPI_ISL_1072978, EPI_ISL_1072983, EPI_ISL_1072984                  | Tokyo Metropolitan Institute of Public Health                                                            | Tokyo Metropolitan Institute of Public Health                                                                   | Masaki Hayashi, Takako Yamazaki, Mami Nagashima, Takushi Fujiwara, Takashi Chiba, Kenji Sadamasu                                                                                                                                                                                                                                                              |
| EPI_ISL_1074484, EPI_ISL_1075422, EPI_ISL_1078109, EPI_ISL_1078407, EPI_ISL_1078490                                                                     | Houston Methodist Hospital                                                                               | Houston Methodist Hospital                                                                                      | S. Wesley Long, Randall J. Olsen, Paul A. Christensen, Sishir Subedi, Robert Olson, James J. Davis, Matthew Ojeda Saavedra, Prasanti Yerramilli, Layne Pruitt, Kristina Reppond, Madison N. Shyer, Jessica Cambric, Ilya J. Finkelstein, Jimmy Gollihar, and James M. Musser                                                                                  |
| EPI_ISL_1078594, EPI_ISL_1078597                                                                                                                        | Tokyo Metropolitan Institute of Public Health                                                            | Tokyo Metropolitan Institute of Public Health                                                                   | Masaki Hayashi, Takako Yamazaki, Ayano Hotta, Souichi Yoshikawa, Tomoki Igarashi, Kayo Hagino, Maki Kanda, Kenji Iida, Mami Nagashima, Takushi Fujiwara, Takashi Chiba, Kenji Sadamasu                                                                                                                                                                        |
| EPI_ISL_1078693, EPI_ISL_1078815, EPI_ISL_1078877, EPI_ISL_1079558, EPI_ISL_1080031, EPI_ISL_1080063, EPI_ISL_1080314                                   | Houston Methodist Hospital                                                                               | Houston Methodist Hospital                                                                                      | S. Wesley Long, Randall J. Olsen, Paul A. Christensen, Sishir Subedi, Robert Olson, James J. Davis, Matthew Ojeda Saavedra, Prasanti Yerramilli, Layne Pruitt, Kristina Reppond, Madison N. Shyer, Jessica Cambric, Ilya J. Finkelstein, Jimmy Gollihar, and James M. Musser                                                                                  |
| EPI_ISL_1080341                                                                                                                                         | NJ Rapid Response Teams                                                                                  | NJ_PHEL                                                                                                         | Lindsey Bodnar, Shiv Verma, Dana Woell, Byeong Jeong                                                                                                                                                                                                                                                                                                          |
| EPI_ISL_1081224, EPI_ISL_1081245<br>EPI_ISL_1082634, EPI_ISL_1082653                                                                                    | Maryland Public Health Laboratory<br>Lighthouse Lab in Milton Keynes                                     | Maryland Public Health Laboratory<br>Wellcome Sanger Institute for the COVID-19 Genomics UK (COG-UK) Consortium | Maryland Department of Health Laboratories Administration<br>The Lighthouse Lab in Milton Keynes and Alex Alderton, Roberto Amato, Jeffrey Barrett, Sonia Goncalves, Ewan Harrison, David K. Jackson, Ian Johnston, Dominic Kwiatkowski, Cordelia Langford, John Sillitoe on behalf of the Wellcome Sanger Institute COVID-19 Surveillance Team               |
| EPI_ISL_1089819, EPI_ISL_1090032, EPI_ISL_1090113, EPI_ISL_1090139, EPI_ISL_1090140, EPI_ISL_1090170, EPI_ISL_1090172, EPI_ISL_1090177, EPI_ISL_1090245 | Dutch COVID-19 response team                                                                             | National Institute for Public Health and the Environment (RIVM)                                                 | Adam Meijer, Harry Vennema, Dirk Eggink, Jeroen Cremer, Sharon van den Brink, Bas van der Veer, AnneMarie van den Brandt, Florian Zwagemaker, Dennis Schmitz, Chantal Reusken, on behalf of the national COVID-19 response team                                                                                                                               |
| EPI_ISL_1091929, EPI_ISL_1091931, EPI_ISL_1091932, EPI_ISL_1091938, EPI_ISL_1091984                                                                     | Johns Hopkins Hospital Department of Pathology                                                           | Johns Hopkins Hospital Department of Pathology                                                                  | C. Paul Morris, Chun Huai Luo, Adannaya Amadi, Matthew Schwartz, Nicholas Gallagher, Heba H. Mostafa                                                                                                                                                                                                                                                          |
| EPI_ISL_1094200                                                                                                                                         | VT Dept. of Health Laboratory                                                                            | Respiratory Viruses Branch, Division of Viral Diseases,                                                         | Krista Queen, Yan Li, Ying Tao, Jing Zhang, Anna Uehara, Anna Montmayeur, Clinton R. Paden, Peter W. Cook, Rachel Marine, Mili Sheth, Jasmine                                                                                                                                                                                                                 |

|                                                                                                                                                                                                                                                                                                                                                                                                                                         |                                                                                                     |                                                                                                                                                     |                                                                                                                                                                                                                                                                                                                                                                                                        |
|-----------------------------------------------------------------------------------------------------------------------------------------------------------------------------------------------------------------------------------------------------------------------------------------------------------------------------------------------------------------------------------------------------------------------------------------|-----------------------------------------------------------------------------------------------------|-----------------------------------------------------------------------------------------------------------------------------------------------------|--------------------------------------------------------------------------------------------------------------------------------------------------------------------------------------------------------------------------------------------------------------------------------------------------------------------------------------------------------------------------------------------------------|
| EPI_ISL_1094373                                                                                                                                                                                                                                                                                                                                                                                                                         | Philadelphia Department of Public Health                                                            | Centers for Disease Control and Prevention<br>Respiratory Viruses Branch, Division of Viral Diseases,<br>Centers for Disease Control and Prevention | Padilla, Sarah Nobles, Mark Burroughs, Lori Rowe, Haibin Wang, Ben L. Rambo-Martin, Dhvani Batra, Justin Lee, Suxiang Tong<br>Krista Queen, Yan Li, Ying Tao, Jing Zhang, Anna Uehara, Anna Montmayeur, Clinton R. Paden, Peter W. Cook, Rachel Marine, Mili Sheth, Jasmine Padilla, Sarah Nobles, Mark Burroughs, Lori Rowe, Haibin Wang, Ben L. Rambo-Martin, Dhvani Batra, Justin Lee, Suxiang Tong |
| EPI_ISL_1094375, EPI_ISL_1094376                                                                                                                                                                                                                                                                                                                                                                                                        | DE Public Health Laboratory                                                                         | Respiratory Viruses Branch, Division of Viral Diseases,<br>Centers for Disease Control and Prevention                                               | Krista Queen, Yan Li, Ying Tao, Jing Zhang, Anna Uehara, Anna Montmayeur, Clinton R. Paden, Peter W. Cook, Rachel Marine, Mili Sheth, Jasmine Padilla, Sarah Nobles, Mark Burroughs, Lori Rowe, Haibin Wang, Ben L. Rambo-Martin, Dhvani Batra, Justin Lee, Suxiang Tong                                                                                                                               |
| EPI_ISL_1094378                                                                                                                                                                                                                                                                                                                                                                                                                         | NYSDOH Wadsworth Center, Virology Lab                                                               | Respiratory Viruses Branch, Division of Viral Diseases,<br>Centers for Disease Control and Prevention                                               | Krista Queen, Yan Li, Ying Tao, Jing Zhang, Anna Uehara, Anna Montmayeur, Clinton R. Paden, Peter W. Cook, Rachel Marine, Mili Sheth, Jasmine Padilla, Sarah Nobles, Mark Burroughs, Lori Rowe, Haibin Wang, Ben L. Rambo-Martin, Dhvani Batra, Justin Lee, Suxiang Tong                                                                                                                               |
| EPI_ISL_1094379                                                                                                                                                                                                                                                                                                                                                                                                                         | PA Department of Health, Bureau of Laboratories                                                     | Respiratory Viruses Branch, Division of Viral Diseases,<br>Centers for Disease Control and Prevention                                               | Krista Queen, Yan Li, Ying Tao, Jing Zhang, Anna Uehara, Anna Montmayeur, Clinton R. Paden, Peter W. Cook, Rachel Marine, Mili Sheth, Jasmine Padilla, Sarah Nobles, Mark Burroughs, Lori Rowe, Haibin Wang, Ben L. Rambo-Martin, Dhvani Batra, Justin Lee, Suxiang Tong                                                                                                                               |
| EPI_ISL_1094381                                                                                                                                                                                                                                                                                                                                                                                                                         | VA-Division of Consolidated Laboratory Services                                                     | Respiratory Viruses Branch, Division of Viral Diseases,<br>Centers for Disease Control and Prevention                                               | Krista Queen, Yan Li, Ying Tao, Jing Zhang, Anna Uehara, Anna Montmayeur, Clinton R. Paden, Peter W. Cook, Rachel Marine, Mili Sheth, Jasmine Padilla, Sarah Nobles, Mark Burroughs, Lori Rowe, Haibin Wang, Ben L. Rambo-Martin, Dhvani Batra, Justin Lee, Suxiang Tong                                                                                                                               |
| EPI_ISL_1095411, EPI_ISL_1095413,<br>EPI_ISL_1095414, EPI_ISL_1095415,<br>EPI_ISL_1095416, EPI_ISL_1095423,<br>EPI_ISL_1095424, EPI_ISL_1095427                                                                                                                                                                                                                                                                                         | Virginia Division of Consolidated Laboratory Services                                               | Virginia Division of Consolidated Laboratory Services                                                                                               | Virginia DCLS                                                                                                                                                                                                                                                                                                                                                                                          |
| EPI_ISL_1097633                                                                                                                                                                                                                                                                                                                                                                                                                         | Colorado Department of Public Health and Environment                                                | Colorado Department of Public Health and Environment                                                                                                | Laura Bankers, Molly C. Hetherington-Rauth, Diana Ir, Shannon Ely, Shannon R. Matzinger, Sarah Elizabeth Totten, Emily A. Travanty                                                                                                                                                                                                                                                                     |
| EPI_ISL_1097970, EPI_ISL_1098377,<br>EPI_ISL_1098451, EPI_ISL_1098457,<br>EPI_ISL_1098597, EPI_ISL_1098598,<br>EPI_ISL_1098600                                                                                                                                                                                                                                                                                                          | Pandemic Response Lab - NYC                                                                         | Pandemic Response Lab, R&D                                                                                                                          | Henry Lee, Michael Hammerling, Melissa Hopkins, Cybill del Castillo, Shinyoung Clair Kang, William Ward, Pradeep Bugga, Haiping Hao, Jon Laurent                                                                                                                                                                                                                                                       |
| EPI_ISL_1098852                                                                                                                                                                                                                                                                                                                                                                                                                         | Jessa                                                                                               | Jessa                                                                                                                                               | Cruys et al. on behalf of the Jessa_cmdLab                                                                                                                                                                                                                                                                                                                                                             |
| EPI_ISL_1111519, EPI_ISL_1111551, EPI_ISL_1111552, EPI_ISL_1111553, EPI_ISL_1111554, EPI_ISL_1111555, EPI_ISL_1111556, EPI_ISL_1111557, EPI_ISL_1111558, EPI_ISL_1111559, EPI_ISL_1111560, EPI_ISL_1111561, EPI_ISL_1111562, EPI_ISL_1111563                                                                                                                                                                                            | see above                                                                                           | see above                                                                                                                                           | see above                                                                                                                                                                                                                                                                                                                                                                                              |
| EPI_ISL_1113164                                                                                                                                                                                                                                                                                                                                                                                                                         | NJ Rapid Response Teams                                                                             | New Jersey Public Health and Environmental Laboratories (PHEL)                                                                                      | Lindsey Bodnar, Shiv Verma, Dana Woell, Byeong Jeong                                                                                                                                                                                                                                                                                                                                                   |
| EPI_ISL_1115007                                                                                                                                                                                                                                                                                                                                                                                                                         | Lighthouse Lab in Milton Keynes                                                                     | Wellcome Sanger Institute for the COVID-19 Genomics UK (COG-UK) Consortium                                                                          | The Lighthouse Lab in Milton Keynes and Alex Alderton, Roberto Amato, Jeffrey Barrett, Sonia Goncalves, Ewan Harrison, David K. Jackson, Ian Johnstone, Dominic Kwiatkowski, Cordelia Langford, John Sillitoe on behalf of the Wellcome Sanger Institute COVID-19 Surveillance Team                                                                                                                    |
| EPI_ISL_1116533                                                                                                                                                                                                                                                                                                                                                                                                                         | NYU Langone Health                                                                                  | Departments of Pathology and Medicine, New York University School of Medicine                                                                       | Adriana Heguy, Dacia Dimartino, Emily Guzman, Christian Marier, Peter Meyn, Sitharam Ramaswami, Gael Westby, Paul Zappile, Yutong Zhang, Paolo Cotzia, Guiqing Wang                                                                                                                                                                                                                                    |
| EPI_ISL_1117776, EPI_ISL_1117796, EPI_ISL_1118029, EPI_ISL_1118030, EPI_ISL_1118031, EPI_ISL_1118032, EPI_ISL_1118033, EPI_ISL_1118034, EPI_ISL_1118035, EPI_ISL_1118036, EPI_ISL_1118037, EPI_ISL_1118038, EPI_ISL_1118039, EPI_ISL_1118040, EPI_ISL_1118041, EPI_ISL_1118042, EPI_ISL_1118043, EPI_ISL_1118044, EPI_ISL_1118045, EPI_ISL_1118046, EPI_ISL_1118047, EPI_ISL_1118048, EPI_ISL_1118049, EPI_ISL_1118079, EPI_ISL_1118080 | see above                                                                                           | see above                                                                                                                                           | see above                                                                                                                                                                                                                                                                                                                                                                                              |
| EPI_ISL_1121031                                                                                                                                                                                                                                                                                                                                                                                                                         | Area of Virology, Serology and Virology Division (SAVID), New South Wales Health Pathology Randwick | Virology Research Laboratory; Area of Virology, Serology and Virology Division (SAVID), New South Wales Health Pathology Randwick                   | Lukas Enderl, Anna Schedl, Thomas Penz, Benedikt Agerer, Maelle Le Moing, Michael Schuster, Bekir Erguner, Jan Laine, Martin Senekowitsch, Christoph Bock, Andreas Berghaler<br>Foster, C.; Au, J.; Ruiz Silva, M.; Deveson, I.; Bull, R.; Van Hal, S.; Rawlinson, W.                                                                                                                                  |
| EPI_ISL_1121234, EPI_ISL_1121240, EPI_ISL_1121262, EPI_ISL_1121263                                                                                                                                                                                                                                                                                                                                                                      | Maryland Public Health Laboratory                                                                   | Maryland Public Health Laboratory                                                                                                                   | Maryland Department of Health Laboratories Administration                                                                                                                                                                                                                                                                                                                                              |
| EPI_ISL_1121362                                                                                                                                                                                                                                                                                                                                                                                                                         | NJ Rapid Response Teams                                                                             | New Jersey Public Health and Environmental Laboratories (NJ PHEL)                                                                                   | Lindsey Bodnar, Shiv K. Verma, Dana Woell, Byeong Jeong                                                                                                                                                                                                                                                                                                                                                |
| EPI_ISL_1121934                                                                                                                                                                                                                                                                                                                                                                                                                         | Department of Health & Mental Hygiene Corona                                                        | New York City Public Health Laboratory                                                                                                              | Jade Wang, et al.                                                                                                                                                                                                                                                                                                                                                                                      |
| EPI_ISL_1123448                                                                                                                                                                                                                                                                                                                                                                                                                         | SARS-CoV-2 testing team, National Institute of Infectious Diseases                                  | Pathogen Genomics Center, National Institute of Infectious Diseases                                                                                 | Tsuyoshi Sekizuka, Kentaro Itokawa, Rina Tanaka, Masanori Hashino, Yoshihiro Kaku, Yasutaka Hoshino, Chikako Shimokawa, Eunsil Park, Tsuguto Fujimoto, Makoto Kuroda                                                                                                                                                                                                                                   |
| EPI_ISL_1123466                                                                                                                                                                                                                                                                                                                                                                                                                         | Pathogen Genomics Center, National Institute of Infectious Diseases                                 | Pathogen Genomics Center, National Institute of Infectious Diseases                                                                                 | Tsuyoshi Sekizuka, Kentaro Itokawa, Rina Tanaka, Masanori Hashino, Makoto Kuroda                                                                                                                                                                                                                                                                                                                       |
| EPI_ISL_1123467                                                                                                                                                                                                                                                                                                                                                                                                                         | Gunma Prefectural Institute of Public Health and Environmental Sciences                             | Pathogen Genomics Center, National Institute of Infectious Diseases                                                                                 | Tsuyoshi Sekizuka, Kentaro Itokawa, Rina Tanaka, Masanori Hashino, Makoto Kuroda                                                                                                                                                                                                                                                                                                                       |
| EPI_ISL_1123468                                                                                                                                                                                                                                                                                                                                                                                                                         | SARS-CoV-2 testing team, National Institute of Infectious Diseases                                  | Pathogen Genomics Center, National Institute of Infectious Diseases                                                                                 | Tsuyoshi Sekizuka, Kentaro Itokawa, Rina Tanaka, Masanori Hashino, Shigeru Tajima, Takahiro Maeki, Eri Nakayama, Motohiko Ogawa, Chang-Kweng Lim, Makoto Kuroda                                                                                                                                                                                                                                        |
| EPI_ISL_1123469, EPI_ISL_1123470, EPI_ISL_1123471                                                                                                                                                                                                                                                                                                                                                                                       | SARS-CoV-2 testing team, National Institute of Infectious Diseases                                  | Pathogen Genomics Center, National Institute of Infectious Diseases                                                                                 | Tsuyoshi Sekizuka, Kentaro Itokawa, Rina Tanaka, Masanori Hashino, Yoshihiro Kaku, Yasutaka Hoshino, Chikako Shimokawa, Eunsil Park, Tsuguto Fujimoto, Makoto Kuroda                                                                                                                                                                                                                                   |
| EPI_ISL_1123472, EPI_ISL_1123473, EPI_ISL_1123474, EPI_ISL_1123475, EPI_ISL_1123476, EPI_ISL_1123477, EPI_ISL_1123478                                                                                                                                                                                                                                                                                                                   | Niigata Prefectural Institute of Public Health and Environmental Sciences                           | Pathogen Genomics Center, National Institute of Infectious Diseases                                                                                 | Tsuyoshi Sekizuka, Kentaro Itokawa, Rina Tanaka, Masanori Hashino, Makoto Kuroda                                                                                                                                                                                                                                                                                                                       |
| EPI_ISL_1123479, EPI_ISL_1123480, EPI_ISL_1123481, EPI_ISL_1123482                                                                                                                                                                                                                                                                                                                                                                      | Pathogen Genomics Center, National Institute of Infectious Diseases                                 | Pathogen Genomics Center, National Institute of Infectious Diseases                                                                                 | Tsuyoshi Sekizuka, Kentaro Itokawa, Rina Tanaka, Masanori Hashino, Makoto Kuroda                                                                                                                                                                                                                                                                                                                       |
| EPI_ISL_1127105                                                                                                                                                                                                                                                                                                                                                                                                                         | Tokyo Metropolitan Institute of Public Health                                                       | Tokyo Metropolitan Institute of Public Health                                                                                                       | Masaki Hayashi, Takako Yamazaki, Mami Ohgai, Maaya Isono, Eri Satou, Kana Kimoto, Hiroshi Hayashi, Ayano Hotta, Mami Nagashima, Takushi Fujiwara, Takashi Chiba, Kenji Sadamasu                                                                                                                                                                                                                        |
| EPI_ISL_1127158, EPI_ISL_1127159, EPI_ISL_1127160, EPI_ISL_1127161, EPI_ISL_1127162                                                                                                                                                                                                                                                                                                                                                     | Pathogen Genomics Center, National Institute of Infectious Diseases                                 | Pathogen Genomics Center, National Institute of Infectious Diseases                                                                                 | Tsuyoshi Sekizuka, Kentaro Itokawa, Rina Tanaka, Masanori Hashino, Makoto Kuroda                                                                                                                                                                                                                                                                                                                       |
| EPI_ISL_1127164, EPI_ISL_1127165, EPI_ISL_1127166, EPI_ISL_1127167, EPI_ISL_1127168, EPI_ISL_1127169, EPI_ISL_1127170, EPI_ISL_1127171, EPI_ISL_1127172, EPI_ISL_1127173, EPI_ISL_1127174, EPI_ISL_1127175, EPI_ISL_1127176, EPI_ISL_1127177, EPI_ISL_1127178, EPI_ISL_1127179, EPI_ISL_1127180, EPI_ISL_1127181, EPI_ISL_1127182, EPI_ISL_1127183                                                                                      | see above                                                                                           | see above                                                                                                                                           | see above                                                                                                                                                                                                                                                                                                                                                                                              |
| EPI_ISL_1127184, EPI_ISL_1127185                                                                                                                                                                                                                                                                                                                                                                                                        | Chiba Prefectural Institute of Public Health                                                        | Pathogen Genomics Center, National Institute of Infectious Diseases                                                                                 | Tsuyoshi Sekizuka, Kentaro Itokawa, Rina Tanaka, Masanori Hashino, Makoto Kuroda                                                                                                                                                                                                                                                                                                                       |
| EPI_ISL_1128175                                                                                                                                                                                                                                                                                                                                                                                                                         | Pathogen Genomics Center, National Institute of Infectious Diseases                                 | Pathogen Genomics Center, National Institute of Infectious Diseases                                                                                 | Tsuyoshi Sekizuka, Kentaro Itokawa, Rina Tanaka, Masanori Hashino, Makoto Kuroda                                                                                                                                                                                                                                                                                                                       |
| EPI_ISL_1128176, EPI_ISL_1128177, EPI_ISL_1128178, EPI_ISL_1128179, EPI_ISL_1128180                                                                                                                                                                                                                                                                                                                                                     | SARS-CoV-2 testing team, National Institute of Infectious Diseases                                  | Pathogen Genomics Center, National Institute of Infectious Diseases                                                                                 | Tsuyoshi Sekizuka, Kentaro Itokawa, Rina Tanaka, Masanori Hashino, Chang-Kweng Lim, Takahiro Maeki, Motohiko Ogawa, Eri Nakayama, Shigeru Tanjima, Makoto Kuroda                                                                                                                                                                                                                                       |
| EPI_ISL_1128177, EPI_ISL_1128178, EPI_ISL_1128179, EPI_ISL_1128180                                                                                                                                                                                                                                                                                                                                                                      | SARS-CoV-2 testing team, National Institute of Infectious Diseases                                  | Pathogen Genomics Center, National Institute of Infectious Diseases                                                                                 | Tsuyoshi Sekizuka, Kentaro Itokawa, Rina Tanaka, Masanori Hashino, Yoshihiro Kaku, Yasutaka Hoshino, Chikako Shimokawa, Kyoko Saito, Tsuguto                                                                                                                                                                                                                                                           |

| EPI_ISL                                                                                                                                                                  | Diseases                                                                                         | Diseases                                                                                               | Fujimoto, Makoto Kuroda                                                                                                                                                                                                                                                                                                                                                                                                                                                                                                                                                                                                                                                                                                                                                                                                                                                                          |
|--------------------------------------------------------------------------------------------------------------------------------------------------------------------------|--------------------------------------------------------------------------------------------------|--------------------------------------------------------------------------------------------------------|--------------------------------------------------------------------------------------------------------------------------------------------------------------------------------------------------------------------------------------------------------------------------------------------------------------------------------------------------------------------------------------------------------------------------------------------------------------------------------------------------------------------------------------------------------------------------------------------------------------------------------------------------------------------------------------------------------------------------------------------------------------------------------------------------------------------------------------------------------------------------------------------------|
| EPI_ISL_1128179                                                                                                                                                          |                                                                                                  |                                                                                                        |                                                                                                                                                                                                                                                                                                                                                                                                                                                                                                                                                                                                                                                                                                                                                                                                                                                                                                  |
| EPI_ISL_1129230, EPI_ISL_1129231, EPI_ISL_1129235, EPI_ISL_1129236                                                                                                       | Tokyo Metropolitan Institute of Public Health                                                    | Tokyo Metropolitan Institute of Public Health                                                          | Masaki Hayashi, Takako Yamazaki, Mami Ohgai, Maaya Isono, Eri Satou, Kana Kimoto, Hiroshi Hayashi, Ayano Hotta, Mami Nagashima, Takushi Fujiwara, Takashi Chiba, Kenji Sadamasu                                                                                                                                                                                                                                                                                                                                                                                                                                                                                                                                                                                                                                                                                                                  |
| EPI_ISL_1131161, EPI_ISL_1131162, EPI_ISL_1131163                                                                                                                        | SARS-CoV-2 testing team, National Institute of Infectious Diseases                               | Pathogen Genomics Center, National Institute of Infectious Diseases                                    | Tsuyoshi Sekizuka, Kentaro Itokawa, Rina Tanaka, Masanori Hashino, Kento Fukano, Kousho Wakae, Hussein H Aly, Takanobu Kato, Makoto Kuroda                                                                                                                                                                                                                                                                                                                                                                                                                                                                                                                                                                                                                                                                                                                                                       |
| EPI_ISL_1131164, EPI_ISL_1131165, EPI_ISL_1131166, EPI_ISL_1131167, EPI_ISL_1131168, EPI_ISL_1131169, EPI_ISL_1131170, EPI_ISL_1131171, EPI_ISL_1131172, EPI_ISL_1131173 | Niigata Prefectural Institute of Public Health and Environmental Sciences                        | Pathogen Genomics Center, National Institute of Infectious Diseases                                    | Tsuyoshi Sekizuka, Kentaro Itokawa, Rina Tanaka, Masanori Hashino, Makoto Kuroda                                                                                                                                                                                                                                                                                                                                                                                                                                                                                                                                                                                                                                                                                                                                                                                                                 |
| EPI_ISL_1137009, EPI_ISL_1137010                                                                                                                                         | Delaware Public Health Lab                                                                       | Delaware Public Health Lab                                                                             | Gregory Hovan                                                                                                                                                                                                                                                                                                                                                                                                                                                                                                                                                                                                                                                                                                                                                                                                                                                                                    |
| EPI_ISL_1137526                                                                                                                                                          | Clinical Molecular Microbiology Laboratory, UNC Hospitals                                        | Jeremy Wang                                                                                            | Jeremy Wang, Alexander Rubinsteyn, Colleen Rice, Jason Smedberg, Shawn Hawken, Melissa Miller, Corbin Jones, Robert Hagan                                                                                                                                                                                                                                                                                                                                                                                                                                                                                                                                                                                                                                                                                                                                                                        |
| EPI_ISL_1147173, EPI_ISL_1147174, EPI_ISL_1147176, EPI_ISL_1147177                                                                                                       | MVZ Labor Krone GbR                                                                              | Robert Koch Institute                                                                                  | unknown                                                                                                                                                                                                                                                                                                                                                                                                                                                                                                                                                                                                                                                                                                                                                                                                                                                                                          |
| EPI_ISL_1158309                                                                                                                                                          | Michigan Department of Health and Human Services, Bureau of Laboratories                         | Michigan Department of Health and Human Services, Bureau of Laboratories                               | Blankenship HM, Riner D, Soehnlén MK                                                                                                                                                                                                                                                                                                                                                                                                                                                                                                                                                                                                                                                                                                                                                                                                                                                             |
| EPI_ISL_1159108                                                                                                                                                          | DC Public Health Lab/ Dept. of Forensic Sciences                                                 | DC Public Health Lab/ Dept. of Forensic Sciences                                                       | Scott Nguyen, Janis Doss, Elizabeth Zelaya, Sarah Scott, Connie Maza, Monica Mann, Brittany Hamilton, David Payne, Jocelyn Hauser                                                                                                                                                                                                                                                                                                                                                                                                                                                                                                                                                                                                                                                                                                                                                                |
| EPI_ISL_1160112                                                                                                                                                          | Laboratory Corporation of America                                                                | Respiratory Viruses Branch, Division of Viral Diseases, Centers for Disease Control and Prevention     | Peter W. Cook, Dakota Howard, Dhvani Batra, Ben L. Rambo-Martin, Mino Agarwal, Eyad Almasri Debbie Boles, Ayla Burns, Nuthawin Charoen Sri Cohen, Susan Countryman, Mary Ann Cristobal, Bobbi Croy, Suzanne Dale, Hrushikesh Deshmukh, Amanda Douglas, Vincent Drouillon, Marcia Eisenberg, Howard Engler, Rama Ghatti, Prashant Gupta, Susan Hicks, Jake Humphrey, Lax Iyer, Manoj Jain, Mohan Kolli, Brian Krueger, Tim Kuphal, Stanley Letovsky, Michael Levandoski, Craig Lukasik, Jonathan Meltzer, Brian Norvell, Mindy Nye, Scott Parker, Christos Petropoulos, John Pruitt, Steven Ragan, Scott Ryan, Mike Sapeta, Jana Schroth, Suresh Babu Selvaraju, Goran Stevovic, Amanda Suchanek, Andrea Throop, Lyndon Tilson, Thomas Urban, Joe Voshell, Kimberly Wagner, Jonathan Williams, Mary Williamson, Qian Zeng, Tricia Zwiefelhofer, Clinton R. Paden, Suxiang Tong, Duncan MacCannell |
| EPI_ISL_1164927, EPI_ISL_1164928, EPI_ISL_1164929                                                                                                                        | Genome Analysis Center, Yamanashi Central Hospital                                               | Genome Analysis Center, Yamanashi Central Hospital                                                     | Yosuke Hirotsu                                                                                                                                                                                                                                                                                                                                                                                                                                                                                                                                                                                                                                                                                                                                                                                                                                                                                   |
| EPI_ISL_1165567, EPI_ISL_1165647, EPI_ISL_1165649                                                                                                                        | Dutch COVID-19 response team                                                                     | National Institute for Public Health and the Environment (RIVM)                                        | Adam Meijer, Harry Vennema, Dirk Eggink, Jeroen Cremer, Sharon van den Brink, Bas van der Veer, AnneMarie van den Brandt, Florian Zwagemaker, Dennis Schmitz, Chantal Reusken, on behalf of the national COVID-19 response team                                                                                                                                                                                                                                                                                                                                                                                                                                                                                                                                                                                                                                                                  |
| EPI_ISL_1165877                                                                                                                                                          | University of Liège COVID-19 testing center                                                      | GIGA Medical Genomics                                                                                  | Keith Durkin, Maria Artesi, Bouchra Boujemla, Nathalie Renotte, Cécile Meex, Sébastien Bontems, Fabrice Bureau, Laurent Gillet, Wouter Coppieters, Marie-Pierre Hayette, Vincent Bours                                                                                                                                                                                                                                                                                                                                                                                                                                                                                                                                                                                                                                                                                                           |
| EPI_ISL_1167279, EPI_ISL_1167290                                                                                                                                         | Maryland Public Health Laboratory                                                                | Maryland Public Health Laboratory                                                                      | Maryland Department of Health Laboratories Administration                                                                                                                                                                                                                                                                                                                                                                                                                                                                                                                                                                                                                                                                                                                                                                                                                                        |
| EPI_ISL_1170851, EPI_ISL_1170852                                                                                                                                         | Public Health Ontario Laboratory                                                                 | Public Health Ontario Laboratory                                                                       | Vanessa G Allen, Philip Banh, Yao Chen, Richard de Borja, Alireza Eshaghi, Nahuel Fittipaldi, Christine Frantz, Jonathan B Gubbay, Jennifer L Guthrie, Lawrence Heister, Esha Joshi, Michael Laszloffy, Aimin Li, Michael CY Li, Dean Maxwell, Sandeep Nagra, Samir N Patel, Jared Simpson, Karthikeyan Sivaraman, Ashleigh Sullivan, Yogi Sundaravadanam, Sarah Teatero, Andre Villegas, Matthew Watson, Sandra Zittermann                                                                                                                                                                                                                                                                                                                                                                                                                                                                      |
| EPI_ISL_1171601                                                                                                                                                          | SYNLAB                                                                                           | GIGA Medical Genomics                                                                                  | Keith Durkin, Maria Artesi, Sébastien Bontems, Raphaël Boreux, Bouchra Boujemla, Nathalie Renotte, Cécile Meex, Pierrette Melin, Marie-Pierre Hayette, Vincent Bours                                                                                                                                                                                                                                                                                                                                                                                                                                                                                                                                                                                                                                                                                                                             |
| EPI_ISL_1171783, EPI_ISL_1171787, EPI_ISL_1171793, EPI_ISL_1171796                                                                                                       | Johns Hopkins Hospital Department of Pathology                                                   | Johns Hopkins Hospital Department of Pathology                                                         | C. Paul Morris, Chun Huai Luo, Adannaya Amadi, Matthew Schwartz, Nicholas Gallagher, Heba H. Mostafa                                                                                                                                                                                                                                                                                                                                                                                                                                                                                                                                                                                                                                                                                                                                                                                             |
| EPI_ISL_1172210, EPI_ISL_1172215, EPI_ISL_1172275, EPI_ISL_1172292, EPI_ISL_1172337, EPI_ISL_1172459, EPI_ISL_1172487, EPI_ISL_1172583, EPI_ISL_1172658, EPI_ISL_1173028 | Pandemic Response Lab - NYC                                                                      | Pandemic Response Lab, R&D                                                                             | Henry Lee, Michael Hammerling, Melissa Hopkins, Cybill del Castillo, Shinyoung Clair Kang, William Ward, Pradeep Bugga, Haiping Hao, Jon Laurent                                                                                                                                                                                                                                                                                                                                                                                                                                                                                                                                                                                                                                                                                                                                                 |
| EPI_ISL_1180781, EPI_ISL_1180785, EPI_ISL_1180801, EPI_ISL_1180805, EPI_ISL_1180830                                                                                      | Austrian Agency for Health and Food Safety (AGES)                                                | Bergthaler laboratory, CeMM Research Center for Molecular Medicine of the Austrian Academy of Sciences | Lukas Enderl, Anna Schedl, Fabian Amman, Thomas Penz, Benedikt Agerer, Maelle Le Moing, Michael Schuster, Bekir Erguner, Jan Laine, Martin Senekowitsch, Christoph Bock, Andreas Bergthaler                                                                                                                                                                                                                                                                                                                                                                                                                                                                                                                                                                                                                                                                                                      |
| EPI_ISL_1181642                                                                                                                                                          | DPHL                                                                                             | Delaware Public Health Lab                                                                             | Gregory Hovan                                                                                                                                                                                                                                                                                                                                                                                                                                                                                                                                                                                                                                                                                                                                                                                                                                                                                    |
| EPI_ISL_1181985, EPI_ISL_1181994, EPI_ISL_1181996, EPI_ISL_1181998, EPI_ISL_1182000                                                                                      | Maryland Public Health Laboratory                                                                | Maryland Public Health Laboratory                                                                      | Maryland Department of Health Laboratories Administration                                                                                                                                                                                                                                                                                                                                                                                                                                                                                                                                                                                                                                                                                                                                                                                                                                        |
| EPI_ISL_1182090                                                                                                                                                          | Murphy Medical Association                                                                       | Grubaugh Lab - Yale School of Public Health                                                            | Joseph Fauver, Mallery Breban, Isabell Ott, Tara Alpert, Mary Petrone, Anderson Brito, Chantal Vogels, Annie Watkins, Chaney Kalinich, Caleb Neal, Eva Laszlo, Steven Murphy, Nathan Grubaugh                                                                                                                                                                                                                                                                                                                                                                                                                                                                                                                                                                                                                                                                                                    |
| EPI_ISL_1191140                                                                                                                                                          | Center for Virology                                                                              | Center for Virology                                                                                    | Jeremy V. Camp, Irene Goerzer, Monika Redlberger-Fritz, Stephan W. Aberle                                                                                                                                                                                                                                                                                                                                                                                                                                                                                                                                                                                                                                                                                                                                                                                                                        |
| EPI_ISL_1195765, EPI_ISL_1195777, EPI_ISL_1195797                                                                                                                        | NYU Langone Health                                                                               | Departments of Pathology and Medicine, New York University School of Medicine                          | Adriana Heguy, Dacia Dimartino, Emily Guzman, Christian Marier, Peter Meyn, Sitharam Ramaswami, Gael Westby, Paul Zappile, Yutong Zhang, Paolo Cotzia, Guiqing Wang                                                                                                                                                                                                                                                                                                                                                                                                                                                                                                                                                                                                                                                                                                                              |
| EPI_ISL_1199159, EPI_ISL_1200053                                                                                                                                         | Swedish national genomic surveillance program of SARS-CoV-2                                      | The Public Health Agency of Sweden                                                                     | Swedish national genomic surveillance program of SARS-CoV-2                                                                                                                                                                                                                                                                                                                                                                                                                                                                                                                                                                                                                                                                                                                                                                                                                                      |
| EPI_ISL_1200525                                                                                                                                                          | DOHMH Riverside                                                                                  | New York City Public Health Laboratory                                                                 | Jade Wang, et al.                                                                                                                                                                                                                                                                                                                                                                                                                                                                                                                                                                                                                                                                                                                                                                                                                                                                                |
| EPI_ISL_1200528, EPI_ISL_1200529, EPI_ISL_1200530                                                                                                                        | DOHMH Chelsea                                                                                    | New York City Public Health Laboratory                                                                 | Jade Wang, et al.                                                                                                                                                                                                                                                                                                                                                                                                                                                                                                                                                                                                                                                                                                                                                                                                                                                                                |
| EPI_ISL_1200611                                                                                                                                                          | DOHMH Riverside                                                                                  | New York City Public Health Laboratory                                                                 | Jade Wang, et al.                                                                                                                                                                                                                                                                                                                                                                                                                                                                                                                                                                                                                                                                                                                                                                                                                                                                                |
| EPI_ISL_1209278                                                                                                                                                          | Department of Laboratory Medicine, Division of Clinical Virology, University of Medicine, Vienna | Bergthaler laboratory, CeMM Research Center for Molecular Medicine of the Austrian Academy of Sciences | Lukas Enderl, Anna Schedl, Fabian Amman, Thomas Penz, Benedikt Agerer, Maelle Le Moing, Michael Schuster, Bekir Erguner, Jan Laine, Martin Senekowitsch, Christoph Bock, Andreas Bergthaler                                                                                                                                                                                                                                                                                                                                                                                                                                                                                                                                                                                                                                                                                                      |
| EPI_ISL_1210498                                                                                                                                                          | Laboratorio Genzano - ASL RM 7                                                                   | INMI Lazzaro Spallanzani IRCCS                                                                         | CEM Gruber, B Bartolini, E Giombini, F Messina, M Rueca, O Butera, G Tramini, E Conti, MR Capobianchi, A Di Caro                                                                                                                                                                                                                                                                                                                                                                                                                                                                                                                                                                                                                                                                                                                                                                                 |
| EPI_ISL_1211598                                                                                                                                                          | Labor Dr. Wisplinghoff - Köln                                                                    | Robert Koch Institute                                                                                  | unknown                                                                                                                                                                                                                                                                                                                                                                                                                                                                                                                                                                                                                                                                                                                                                                                                                                                                                          |
| EPI_ISL_1214341                                                                                                                                                          | SYNLAB MVZ Weiden                                                                                | Robert Koch Institute                                                                                  | unknown                                                                                                                                                                                                                                                                                                                                                                                                                                                                                                                                                                                                                                                                                                                                                                                                                                                                                          |
| EPI_ISL_1215936                                                                                                                                                          | Labor Dr. Wisplinghoff - Köln                                                                    | Robert Koch Institute                                                                                  | unknown                                                                                                                                                                                                                                                                                                                                                                                                                                                                                                                                                                                                                                                                                                                                                                                                                                                                                          |
| EPI_ISL_1224774                                                                                                                                                          | M Health Fairview                                                                                | Minnesota Department of Health, Public Health Laboratory                                               | Alexandra Lorentz, Jacob Garfin, Matt Plumb, and Xiong Wang                                                                                                                                                                                                                                                                                                                                                                                                                                                                                                                                                                                                                                                                                                                                                                                                                                      |
| EPI_ISL_1224937                                                                                                                                                          | Houston Health Dept.                                                                             | Houston Health Dept.                                                                                   | Ryker Penn, Pamela Brown, Adolpho Lara                                                                                                                                                                                                                                                                                                                                                                                                                                                                                                                                                                                                                                                                                                                                                                                                                                                           |
| EPI_ISL_1225731                                                                                                                                                          | Yale Clinical Virology Lab                                                                       | Grubaugh Lab - Yale School of Public Health                                                            | Joseph Fauver, Mallery Breban, Isabell Ott, Tara Alpert, Mary Petrone, Anderson Brito, Chantal Vogels, Annie Watkins, Chaney Kalinich, Marie L. Landry,                                                                                                                                                                                                                                                                                                                                                                                                                                                                                                                                                                                                                                                                                                                                          |

|                                                                                                                                                                                                                                                                                                                  |                                                                                |                                                                                |                                                                                                                                                                                                                                                                                           |
|------------------------------------------------------------------------------------------------------------------------------------------------------------------------------------------------------------------------------------------------------------------------------------------------------------------|--------------------------------------------------------------------------------|--------------------------------------------------------------------------------|-------------------------------------------------------------------------------------------------------------------------------------------------------------------------------------------------------------------------------------------------------------------------------------------|
| EPI_ISL_1226457                                                                                                                                                                                                                                                                                                  | MONTEFIORE MEDICAL CENTER LABORATORIES                                         | Wadsworth Center, New York State Department of Health                          | Nathan Grubaugh<br>Kirsten St. George, Daryl M. Lamson, Alexis Russel, Matthew Shudt, Melissa A Leisner, Jonathan Plitnick, Navjot Singh, John Kelly, Erasmus Schneider, Erica Lasek-Nesselquist                                                                                          |
| EPI_ISL_1227232, EPI_ISL_1227233                                                                                                                                                                                                                                                                                 | ALBANY MEDICAL CENTER                                                          | Wadsworth Center, New York State Department of Health                          | Kirsten St. George, Daryl M. Lamson, Alexis Russel, Matthew Shudt, Melissa A Leisner, Jonathan Plitnick, Navjot Singh, John Kelly, Erasmus Schneider, Erica Lasek-Nesselquist                                                                                                             |
| EPI_ISL_1227234                                                                                                                                                                                                                                                                                                  | Wadsworth Center, New York State Department of Health                          | Wadsworth Center, New York State Department of Health                          | Kirsten St. George, Daryl M. Lamson, Alexis Russel, Matthew Shudt, Melissa A Leisner, Jonathan Plitnick, Navjot Singh, John Kelly, Erasmus Schneider, Erica Lasek-Nesselquist                                                                                                             |
| EPI_ISL_1227235                                                                                                                                                                                                                                                                                                  | ALBANY MEDICAL CENTER                                                          | Wadsworth Center, New York State Department of Health                          | Kirsten St. George, Daryl M. Lamson, Alexis Russel, Matthew Shudt, Melissa A Leisner, Jonathan Plitnick, Navjot Singh, John Kelly, Erasmus Schneider, Erica Lasek-Nesselquist                                                                                                             |
| EPI_ISL_1227237                                                                                                                                                                                                                                                                                                  | Columbia University Irving Medical Center                                      | Wadsworth Center, New York State Department of Health                          | Kirsten St. George, Daryl M. Lamson, Alexis Russel, Matthew Shudt, Melissa A Leisner, Jonathan Plitnick, Navjot Singh, John Kelly, Erasmus Schneider, Erica Lasek-Nesselquist                                                                                                             |
| EPI_ISL_1227239, EPI_ISL_1227240, EPI_ISL_1227241                                                                                                                                                                                                                                                                | SUNY UPSTATE MEDICAL UNIVERSITY                                                | Wadsworth Center, New York State Department of Health                          | Kirsten St. George, Daryl M. Lamson, Alexis Russel, Matthew Shudt, Melissa A Leisner, Jonathan Plitnick, Navjot Singh, John Kelly, Erasmus Schneider, Erica Lasek-Nesselquist                                                                                                             |
| EPI_ISL_1227242                                                                                                                                                                                                                                                                                                  | MEMORIAL SLOAN KETTERING CANCER CENTER                                         | Wadsworth Center, New York State Department of Health                          | Kirsten St. George, Daryl M. Lamson, Alexis Russel, Matthew Shudt, Melissa A Leisner, Jonathan Plitnick, Navjot Singh, John Kelly, Erasmus Schneider, Erica Lasek-Nesselquist                                                                                                             |
| EPI_ISL_1227244                                                                                                                                                                                                                                                                                                  | NYC Pandemic Response Lab                                                      | Wadsworth Center, New York State Department of Health                          | Kirsten St. George, Daryl M. Lamson, Alexis Russel, Matthew Shudt, Melissa A Leisner, Jonathan Plitnick, Navjot Singh, John Kelly, Erasmus Schneider, Erica Lasek-Nesselquist                                                                                                             |
| EPI_ISL_1227245                                                                                                                                                                                                                                                                                                  | SARATOGA HOSPITAL LABORATORY                                                   | Wadsworth Center, New York State Department of Health                          | Kirsten St. George, Daryl M. Lamson, Alexis Russel, Matthew Shudt, Melissa A Leisner, Jonathan Plitnick, Navjot Singh, John Kelly, Erasmus Schneider, Erica Lasek-Nesselquist                                                                                                             |
| EPI_ISL_1227246                                                                                                                                                                                                                                                                                                  | Wadsworth Center, New York State Department of Health                          | Wadsworth Center, New York State Department of Health                          | Kirsten St. George, Daryl M. Lamson, Alexis Russel, Matthew Shudt, Melissa A Leisner, Jonathan Plitnick, Navjot Singh, John Kelly, Erasmus Schneider, Erica Lasek-Nesselquist                                                                                                             |
| EPI_ISL_1227247, EPI_ISL_1227248                                                                                                                                                                                                                                                                                 | WESTCHESTER MEDICAL CENTER                                                     | Wadsworth Center, New York State Department of Health                          | Kirsten St. George, Daryl M. Lamson, Alexis Russel, Matthew Shudt, Melissa A Leisner, Jonathan Plitnick, Navjot Singh, John Kelly, Erasmus Schneider, Erica Lasek-Nesselquist                                                                                                             |
| EPI_ISL_1229050                                                                                                                                                                                                                                                                                                  | UNILIANS DECINES                                                               | CNR Virus des Infections Respiratoires - France SUD                            | Antonin Bal, Gregory Destras, Gwendolyne Burfin, Hadrien Regue, Quentin Semanas, Martine Valette, Bruno Lina, Laurence Josset                                                                                                                                                             |
| EPI_ISL_1231615                                                                                                                                                                                                                                                                                                  | Fulgent Genetics                                                               | Fulgent Genetics                                                               | Harry Gao, Mickey Li, John Gao, Joseph Fierro, Benafsh Sapra, Becky Tsai, Yan Meng, Doreen Ng, James Xie                                                                                                                                                                                  |
| EPI_ISL_1232310, EPI_ISL_1232883, EPI_ISL_1232909                                                                                                                                                                                                                                                                | Dutch COVID-19 response team                                                   | National Institute for Public Health and the Environment (RIVM)                | Adam Meijer, Harry Vennema, Dirk Eggink, Jeroen Cremer, Sharon van den Brink, Bas van der Veer, AnneMarie van den Brandt, Florian Zwagemaker, Dennis Schmitz, Chantal Reusken, on behalf of the national COVID-19 response team                                                           |
| EPI_ISL_1233286, EPI_ISL_1233289, EPI_ISL_1233290, EPI_ISL_1233296, EPI_ISL_1233297, EPI_ISL_1233298, EPI_ISL_1233299, EPI_ISL_1233302                                                                                                                                                                           | Massachusetts State Public Health Laboratory                                   | Massachusetts State Public Health Laboratory                                   | Andrew Lang, Timelia Fink, Glen Gallagher, Sandra Smole                                                                                                                                                                                                                                   |
| EPI_ISL_1234359                                                                                                                                                                                                                                                                                                  | Colorado Department of Public Health and Environment                           | Colorado Department of Public Health and Environment                           | Laura Bankers, Molly C. Hetherington-Rauth, Diana Ir, Shannon Ely, Shannon R. Matzinger, Sarah Elizabeth Totten, Emily A. Travanty                                                                                                                                                        |
| EPI_ISL_1235668, EPI_ISL_1235669                                                                                                                                                                                                                                                                                 | INNO Diagnostics Reference Laboratory                                          | RCMI-Center for Research Resources, Ponce Research Institute                   | Vanessa Rivera-Amill, Andrea Arias-García, Raphael Sánchez-Torres                                                                                                                                                                                                                         |
| EPI_ISL_1235902, EPI_ISL_1236250, EPI_ISL_1236275, EPI_ISL_1236398, EPI_ISL_1236456, EPI_ISL_1236698, EPI_ISL_1237071, EPI_ISL_1237355, EPI_ISL_1237578, EPI_ISL_1237614, EPI_ISL_1237646, EPI_ISL_1238043, EPI_ISL_1238055, EPI_ISL_1238056, EPI_ISL_1238143, EPI_ISL_1238513, EPI_ISL_1238521, EPI_ISL_1238560 | see above                                                                      | Houston Methodist Hospital                                                     | S. Wesley Long, Randall J. Olsen, Paul A. Christensen, Sishir Subedi, Robert Olson, James J. Davis, Matthew Ojeda Saavedra, Prasanti Yerramilli, Layne Pruitt, Kristina Reppond, Madison N. Shyer, Jessica Cambric, Ilya J. Finkelstein, Jimmy Gollihar, and James M. Musser              |
| EPI_ISL_1238798, EPI_ISL_1238813                                                                                                                                                                                                                                                                                 | MD PHL                                                                         | MD PHL                                                                         | Maryland Department of Health Laboratories Administration                                                                                                                                                                                                                                 |
| EPI_ISL_1238913, EPI_ISL_1238917, EPI_ISL_1238951, EPI_ISL_1238992                                                                                                                                                                                                                                               | Johns Hopkins Hospital Department of Pathology                                 | Johns Hopkins Hospital Department of Pathology                                 | C. Paul Morris, Chun Huai Luo, Adannaya Amadi, Matthew Schwartz, Nicholas Gallagher, Heba H. Mostafa                                                                                                                                                                                      |
| EPI_ISL_1239140                                                                                                                                                                                                                                                                                                  | Ohio State University Wexner Medical Center                                    | Polaris Molecular Laboratory                                                   | Ru P, Chappell D, Chang Y-S, Tu H, Snyder P, Pancholi P, Koenig S, Corcoran S, Jones D                                                                                                                                                                                                    |
| EPI_ISL_1239141                                                                                                                                                                                                                                                                                                  | Ohio State University Wexner Medical Center                                    | Polaris Molecular Laboratory                                                   | Chappell D, Ru P, Chang Y-S, Tu H, Snyder P, Pancholi P, Koenig S, Corcoran S, Jones D                                                                                                                                                                                                    |
| EPI_ISL_1239142                                                                                                                                                                                                                                                                                                  | Ohio State University Wexner Medical Cente                                     | Polaris Molecular Laboratory                                                   | Chang Y-S, Ru P, Chappell D, Tu H, Snyder P, Pancholi P, Koenig S, Corcoran S, Jones D                                                                                                                                                                                                    |
| EPI_ISL_1240005                                                                                                                                                                                                                                                                                                  | Florida Bureau of Public Health Laboratories                                   | Florida Bureau of Public Health Laboratories                                   | Sarah Schmedes, Jason Blanton                                                                                                                                                                                                                                                             |
| EPI_ISL_1240218                                                                                                                                                                                                                                                                                                  | Jessa                                                                          | Jessa                                                                          | Cruys et al. on behalf of the Jessa_cmdLab                                                                                                                                                                                                                                                |
| EPI_ISL_1240905                                                                                                                                                                                                                                                                                                  | Clinical Molecular Microbiology Laboratory, UNC Hospitals                      | Jeremy Wang                                                                    | Jeremy Wang, Alexander Rubinsteyn, Colleen Rice, Jason Smedberg, Shawn Hawken, Melissa Miller, Corbin Jones, Robert Hagan                                                                                                                                                                 |
| EPI_ISL_1241740                                                                                                                                                                                                                                                                                                  | SYNLAB                                                                         | GIGA Medical Genomics                                                          | Keith Durkin, Maria Artesi, Sébastien Bontems, Raphaël Boreux, Bouchra Boujemla, Nathalie Renotte, Cécile Meex, Pierrette Melin, Marie-Pierre Hayette, Vincent Bours                                                                                                                      |
| EPI_ISL_1241750                                                                                                                                                                                                                                                                                                  | University of Liège COVID-19 testing center                                    | GIGA Medical Genomics                                                          | Keith Durkin, Maria Artesi, Sébastien Bontems, Raphaël Boreux, Bouchra Boujemla, Nathalie Renotte, Cécile Meex, Pierrette Melin, Marie-Pierre Hayette, Vincent Bours                                                                                                                      |
| EPI_ISL_1242142                                                                                                                                                                                                                                                                                                  | Lighthouse Lab in Cambridge                                                    | Wellcome Sanger Institute for the COVID-19 Genomics UK (COG-UK) Consortium     | Rob Howes, The Lighthouse Lab in Cambridge and Alex Alderton, Roberto Amato, Jeffrey Barrett, Sonia Goncalves, Ewan Harrison, David K. Jackson, Ian Johnston, Dominic Kwiatkowski, Cordelia Langford, John Sillitoe on behalf of the Wellcome Sanger Institute COVID-19 Surveillance Team |
| EPI_ISL_1250527                                                                                                                                                                                                                                                                                                  | Michigan Department of Health and Human Services, Bureau of Laboratories       | Michigan Department of Health and Human Services, Bureau of Laboratories       | Blankenship HM, Riner D, Soehnlén MK                                                                                                                                                                                                                                                      |
| EPI_ISL_1252630                                                                                                                                                                                                                                                                                                  | TXDSHS                                                                         | TXDSHS                                                                         | Rashmi Tuladhar, Bonnie Oh, Jenny Zhang, Maliha Rahman, Mayela Pedrueza, Anita Pokharel, Myong Koag, Chun Wang, Rachel Lee, Grace Kubin                                                                                                                                                   |
| EPI_ISL_1252844, EPI_ISL_1252845                                                                                                                                                                                                                                                                                 | INNO Diagnostics Reference Laboratory                                          | RCMI-Center for Research Resources, Ponce Research Institute                   | Vanessa Rivera-Amill, Andrea Arias-García, Raphael Sánchez-Torres                                                                                                                                                                                                                         |
| EPI_ISL_1252858, EPI_ISL_1252882                                                                                                                                                                                                                                                                                 | University of Wisconsin-Madison AIDS Vaccine Research Laboratories             | University of Wisconsin-Madison AIDS Vaccine Research Laboratories             | Gage Moreno, Katarina Braun, et al. AIDS Vaccine Research Laboratories                                                                                                                                                                                                                    |
| EPI_ISL_1253727, EPI_ISL_1253807, EPI_ISL_1253834                                                                                                                                                                                                                                                                | Broad Institute Clinical Research Sequencing Platform                          | Infectious Disease Program, Broad Institute of Harvard and MIT                 | Lemieux,J.E., Siddle,K.J., Adams,G., Gladden-Young,A., Lagerborg,K., Rudy,M., DeRuff,K., Carter,A., Normandin,E., Bauer,M., Reilly,S., Tomkins-Tinch,C., Loreth,C., Chaluvadi,S., Birren,B.W., Gallagher,G., Smole,S., Park,D.J., MacInnis,B.L., and Sabeti,P.C.                          |
| EPI_ISL_1254264                                                                                                                                                                                                                                                                                                  | NJDOH, Public Health and Environmental Laboratories                            | NJ_PHEL                                                                        | Lindsey Bodnar, Shiv K. Verma, Dana Woell, Byeong Jeong                                                                                                                                                                                                                                   |
| EPI_ISL_1258929, EPI_ISL_1258930, EPI_ISL_1258931, EPI_ISL_1258932, EPI_ISL_1258933                                                                                                                                                                                                                              | Pandemic Response Lab - NYC                                                    | Pandemic Response Lab, R&D                                                     | Henry Lee, Michael Hammerling, Melissa Hopkins, Cybill del Castillo, Shinyoung Clair Kang, William Ward, Pradeep Bugga, Haiping Hao, Jon Laurent                                                                                                                                          |
| EPI_ISL_1261141                                                                                                                                                                                                                                                                                                  | Molecular & Genomic Pathology Laboratory, Thomas Jefferson University Hospital | Molecular & Genomic Pathology Laboratory, Thomas Jefferson University Hospital | Nitika Badjatia, Run Jin, Zi-xuan Wang                                                                                                                                                                                                                                                    |

|                                                                                                                                                                                                                                                               |                                                                                      |                                                                                             |                                                                                                                                                                                                                                                                                                                                                                                                                                                                                                                                                                                                                                                                                                                                                                |
|---------------------------------------------------------------------------------------------------------------------------------------------------------------------------------------------------------------------------------------------------------------|--------------------------------------------------------------------------------------|---------------------------------------------------------------------------------------------|----------------------------------------------------------------------------------------------------------------------------------------------------------------------------------------------------------------------------------------------------------------------------------------------------------------------------------------------------------------------------------------------------------------------------------------------------------------------------------------------------------------------------------------------------------------------------------------------------------------------------------------------------------------------------------------------------------------------------------------------------------------|
| EPI_ISL_1261855                                                                                                                                                                                                                                               | DOHMH Chelsea                                                                        | New York City Public Health Laboratory                                                      | Jade Wang, et al.                                                                                                                                                                                                                                                                                                                                                                                                                                                                                                                                                                                                                                                                                                                                              |
| EPI_ISL_1261856                                                                                                                                                                                                                                               | DOHMH Central Harlem                                                                 | New York City Public Health Laboratory                                                      | Jade Wang, et al.                                                                                                                                                                                                                                                                                                                                                                                                                                                                                                                                                                                                                                                                                                                                              |
| EPI_ISL_1262512, EPI_ISL_1262573, EPI_ISL_1262574                                                                                                                                                                                                             | NYU Langone Health                                                                   | Departments of Pathology and Medicine, New York University School of Medicine               | Adriana Heguy, Dacia Dimartino, Emily Guzman, Christian Marier, Peter Meyn, Sitharam Ramaswami, Gael Westby, Paul Zappile, Yutong Zhang, Paolo Cotzia, Guiqing Wang                                                                                                                                                                                                                                                                                                                                                                                                                                                                                                                                                                                            |
| EPI_ISL_1265682, EPI_ISL_1265759                                                                                                                                                                                                                              | CNR Virus des Infections Respiratoires - France SUD                                  | CNR Virus des Infections Respiratoires - France SUD                                         | Antonin Bal, Gregory Destras, Gwendolyne Burfin, Hadrien Regue, Quentin Semanas, Martine Valette, Bruno Lina, Laurence Josset                                                                                                                                                                                                                                                                                                                                                                                                                                                                                                                                                                                                                                  |
| EPI_ISL_1268202                                                                                                                                                                                                                                               | DPHL                                                                                 | Delaware Public Health Lab                                                                  | Rebecca Savage                                                                                                                                                                                                                                                                                                                                                                                                                                                                                                                                                                                                                                                                                                                                                 |
| EPI_ISL_1272197                                                                                                                                                                                                                                               | MD PHL                                                                               | MD PHL                                                                                      | Maryland Department of Health Laboratories Administration                                                                                                                                                                                                                                                                                                                                                                                                                                                                                                                                                                                                                                                                                                      |
| EPI_ISL_1273320, EPI_ISL_1273321, EPI_ISL_1273324, EPI_ISL_1273346, EPI_ISL_1273356                                                                                                                                                                           | The Jackson Laboratory                                                               | The Jackson Laboratory                                                                      | Bergeron D, Renzette N, Adams M, Omerza G, Kelly K, Li L                                                                                                                                                                                                                                                                                                                                                                                                                                                                                                                                                                                                                                                                                                       |
| EPI_ISL_1275651                                                                                                                                                                                                                                               | Lighthouse Lab in Cambridge                                                          | Wellcome Sanger Institute for the COVID-19 Genomics UK (COG-UK) Consortium                  | Rob Howes, The Lighthouse Lab in Cambridge and Alex Alderton, Roberto Amato, Jeffrey Barrett, Sonia Goncalves, Ewan Harrison, David K. Jackson, Ian Johnston, Dominic Kwiatkowski, Cordelia Langford, John Sillitoe on behalf of the Wellcome Sanger Institute COVID-19 Surveillance Team                                                                                                                                                                                                                                                                                                                                                                                                                                                                      |
| EPI_ISL_1279222, EPI_ISL_1279238                                                                                                                                                                                                                              | Microvida                                                                            | Microvida                                                                                   | J. Stohr, S.D. Pas, J. Verweij                                                                                                                                                                                                                                                                                                                                                                                                                                                                                                                                                                                                                                                                                                                                 |
| EPI_ISL_1282555                                                                                                                                                                                                                                               | Labor Dr. Wisplinghoff - Köln                                                        | Robert Koch Institute                                                                       | unknown                                                                                                                                                                                                                                                                                                                                                                                                                                                                                                                                                                                                                                                                                                                                                        |
| EPI_ISL_1284425                                                                                                                                                                                                                                               | SYNLAB MVZ Weiden                                                                    | Robert Koch Institute                                                                       | unknown                                                                                                                                                                                                                                                                                                                                                                                                                                                                                                                                                                                                                                                                                                                                                        |
| EPI_ISL_1292684                                                                                                                                                                                                                                               | State Laboratories Division, Hawaii State Department of Health                       | State Laboratories Division, Hawaii State Department of Health                              | Pamela O'Brien, Drew Kuwazaki, Ayana Garnet, Razvan Sultana, Edward Desmond                                                                                                                                                                                                                                                                                                                                                                                                                                                                                                                                                                                                                                                                                    |
| EPI_ISL_1292822, EPI_ISL_1292833, EPI_ISL_1292834, EPI_ISL_1292836, EPI_ISL_1292851, EPI_ISL_1292854, EPI_ISL_1292874, EPI_ISL_1292896, EPI_ISL_1292899, EPI_ISL_1292901, EPI_ISL_1292903, EPI_ISL_1292930, EPI_ISL_1292932, EPI_ISL_1292938, EPI_ISL_1292940 | see above                                                                            | Maryland Genomics, Institute for Genome Sciences, University of Maryland School of Medicine | Tallon, Luke J; Sadzewicz, Lisa D; Humphys, Mike; Ott, Sandra; Roussey, Holly; Mehta, Aditya; Vavikolanu, Kranthi; Fraser, Claire M; Ravel, Jacques                                                                                                                                                                                                                                                                                                                                                                                                                                                                                                                                                                                                            |
| EPI_ISL_1292982                                                                                                                                                                                                                                               | Yale Clinical Virology Lab                                                           | Grubaugh Lab - Yale School of Public Health                                                 | Joseph Fauver, Mallery Breban, Isabell Ott, Tara Alpert, Mary Petrone, Anderson Brito, Chantal Vogels, Annie Watkins, Chaney Kalinich, Jessica Rothman, Marie L. Landry, Nathan Grubaugh                                                                                                                                                                                                                                                                                                                                                                                                                                                                                                                                                                       |
| EPI_ISL_1293041                                                                                                                                                                                                                                               | MD Public Health Laboratory                                                          | MD Public Health Laboratory                                                                 | Maryland Department of Health Laboratories Administration                                                                                                                                                                                                                                                                                                                                                                                                                                                                                                                                                                                                                                                                                                      |
| EPI_ISL_1293234                                                                                                                                                                                                                                               | Yale Clinical Virology Lab                                                           | Grubaugh Lab - Yale School of Public Health                                                 | Joseph Fauver, Mallery Breban, Isabell Ott, Tara Alpert, Mary Petrone, Anderson Brito, Chantal Vogels, Annie Watkins, Chaney Kalinich, Jessica Rothman, Marie L. Landry, Nathan Grubaugh                                                                                                                                                                                                                                                                                                                                                                                                                                                                                                                                                                       |
| EPI_ISL_1296790, EPI_ISL_1296933, EPI_ISL_1297070                                                                                                                                                                                                             | Sonora Quest Laboratories                                                            | TGen North                                                                                  | "Jolene Bowers, Heather Centner, Chris French, Hayley Yaglom, Ashlyn Pfeiffer, Darrin Lemmer, Dave Engelthaler, The Arizona COVID Genomics Union (ACGU)"                                                                                                                                                                                                                                                                                                                                                                                                                                                                                                                                                                                                       |
| EPI_ISL_1300931, EPI_ISL_1300932, EPI_ISL_1300934, EPI_ISL_1300935                                                                                                                                                                                            | MSHS Clinical Microbiology Laboratories                                              | MSHS Pathogen Surveillance Program                                                          | Ana S. Gonzalez-Reiche, Hala Alshammary, Mitchell J. Sullivan, Brianne Ciferri, Ajay Obla, Angela Amoako, Mahmoud Awawda, Daniel Floda, Julia Matthews, Ashley Salimbangon, Levy Sominsky, Katherine Beach, Kayla Russo, Charles Gleason, Shelcie Fabre, Giulio Kleiner, Zenab Khan, Bremy Alburquerque, Adriana van de Guchte, Komal Srivastava, Matthew M. Hernandez, Jayeeta Dutta, Denise Jurczynszak, Nancy Francoeur, Betsaida Salom Melo, Irina Oussenko, Gintaras Deikus, Juan Soto, Shwetha Hara Sridhar, Ying-Chih Wang, Kathryn Twyman, Deena R. Altman, Robert Sebra, Adolfo Garcia-Sastre, Marta Luksza, Gopi Patel, Sarah Schaefer, Melissa Gitman, Michael D. Nowak, Alberto Paniz-Mondolfi, Emilia Mia Sordillo, Viviana Simon, Harm van Bakel |
| EPI_ISL_1303159, EPI_ISL_1303210                                                                                                                                                                                                                              | Microbiology Division, South Carolina Department of Health and Environmental Control | Microbiology Division, South Carolina Department of Health and Environmental Control        | Flores,H., Freeman,J.                                                                                                                                                                                                                                                                                                                                                                                                                                                                                                                                                                                                                                                                                                                                          |
| EPI_ISL_1303644, EPI_ISL_1303770, EPI_ISL_1303873, EPI_ISL_1303876, EPI_ISL_1304402, EPI_ISL_1305292, EPI_ISL_1305372, EPI_ISL_1305636                                                                                                                        | Houston Methodist Hospital                                                           | Houston Methodist Hospital                                                                  | S. Wesley Long, Randall J. Olsen, Paul A. Christensen, Sishir Subedi, Robert Olson, James J. Davis, Matthew Ojeda Saavedra, Prasanti Yerramilli, Layne Pruitt, Kristina Reppond, Madison N. Shyer, Jessica Cambric, Ilya J. Finkelstein, Jimmy Gollihar, and James M. Musser                                                                                                                                                                                                                                                                                                                                                                                                                                                                                   |
| EPI_ISL_1305838, EPI_ISL_1305905, EPI_ISL_1305932, EPI_ISL_1305933, EPI_ISL_1305934, EPI_ISL_1305935, EPI_ISL_1305936, EPI_ISL_1305937                                                                                                                        | Johns Hopkins Hospital Department of Pathology                                       | Johns Hopkins Hospital Department of Pathology                                              | C. Paul Morris, Chun Huai Luo, Adannaya Amadi, Matthew Schwartz, Heba H. Mostafa                                                                                                                                                                                                                                                                                                                                                                                                                                                                                                                                                                                                                                                                               |
| EPI_ISL_1306025                                                                                                                                                                                                                                               | University Hospital for Infectious Diseases                                          | Croatian Institute of Public Health                                                         | Irena Tabain, Ivana Ferenak                                                                                                                                                                                                                                                                                                                                                                                                                                                                                                                                                                                                                                                                                                                                    |
| EPI_ISL_1306288, EPI_ISL_1306318, EPI_ISL_1306574, EPI_ISL_1306690, EPI_ISL_1307212                                                                                                                                                                           | Pandemic Response Lab - NYC                                                          | Pandemic Response Lab, R&D                                                                  | Henry Lee, Michael Hammerling, Melissa Hopkins, Cybill del Castillo, Shinyoung Clair Kang, William Ward, Pradeep Bugga, Sol Rey, Dylan Law, Haiping Hao, Jon Laurent                                                                                                                                                                                                                                                                                                                                                                                                                                                                                                                                                                                           |
| EPI_ISL_1312344, EPI_ISL_1312345                                                                                                                                                                                                                              | Gravity Diagnostics                                                                  | Kentucky State Public Health Lab                                                            | Stephanie Lunn, Karim George, Joshua Tobias, William Grooms, Vaneet Arora, Matthew Johnson, Rachel Zinner, Rhonda Lucas                                                                                                                                                                                                                                                                                                                                                                                                                                                                                                                                                                                                                                        |
| EPI_ISL_1312346, EPI_ISL_1312347                                                                                                                                                                                                                              | Kentucky State Public Health Lab                                                     | Kentucky State Public Health Lab                                                            | Stephanie Lunn, Karim George, Joshua Tobias, William Grooms, Vaneet Arora, Matthew Johnson, Rachel Zinner, Rhonda Lucas                                                                                                                                                                                                                                                                                                                                                                                                                                                                                                                                                                                                                                        |
| EPI_ISL_1312355, EPI_ISL_1312359, EPI_ISL_1312360                                                                                                                                                                                                             | Gravity Diagnostics                                                                  | Kentucky State Public Health Lab                                                            | Stephanie Lunn, Karim George, Joshua Tobias, William Grooms, Vaneet Arora, Matthew Johnson, Rachel Zinner, Rhonda Lucas                                                                                                                                                                                                                                                                                                                                                                                                                                                                                                                                                                                                                                        |
| EPI_ISL_1312795                                                                                                                                                                                                                                               | Molecular & Genomic Pathology Laboratory, Thomas Jefferson University Hospital       | Molecular & Genomic Pathology Laboratory, Thomas Jefferson University Hospital              | Run Jin, Nitika Badjatia, Zi-xuan Wang                                                                                                                                                                                                                                                                                                                                                                                                                                                                                                                                                                                                                                                                                                                         |
| EPI_ISL_1313423, EPI_ISL_1313458, EPI_ISL_1313509, EPI_ISL_1313510                                                                                                                                                                                            | Karolinska University Hospital                                                       | Karolinska University Hospital                                                              | Jan Albert, Tobias Allander, Annelie Bjerkner, Sandra Broddesson, Robert Dyrdak, Martin Ekman, Lynda Eneh, Lina Guerra Blomqvist, Karolina Ininbergs, Tanja Normark, Isak Sylvin, Zhibing Yun, Martina Wahlund, Valterri Wirta                                                                                                                                                                                                                                                                                                                                                                                                                                                                                                                                 |
| EPI_ISL_1314020                                                                                                                                                                                                                                               | CENTRE HOSPITALIER PIERRE OUDOT                                                      | CNR Virus des Infections Respiratoires - France SUD                                         | Antonin Bal, Gregory Destras, Gwendolyne Burfin, Hadrien Regue, Quentin Semanas, Martine Valette, Bruno Lina, Laurence Josset                                                                                                                                                                                                                                                                                                                                                                                                                                                                                                                                                                                                                                  |
| EPI_ISL_1314170, EPI_ISL_1314171, EPI_ISL_1314172, EPI_ISL_1314173, EPI_ISL_1314174, EPI_ISL_1314175, EPI_ISL_1314176, EPI_ISL_1314177                                                                                                                        | Kentucky State Public Health Lab                                                     | Kentucky State Public Health Lab                                                            | Stephanie Lunn, Karim George, Joshua Tobias, William Grooms, Vaneet Arora, Matthew Johnson, Rachel Zinner, Rhonda Lucas                                                                                                                                                                                                                                                                                                                                                                                                                                                                                                                                                                                                                                        |
| EPI_ISL_1314178, EPI_ISL_1314179, EPI_ISL_1314180, EPI_ISL_1314181, EPI_ISL_1314182, EPI_ISL_1314183, EPI_ISL_1314184, EPI_ISL_1314185, EPI_ISL_1314187, EPI_ISL_1314198                                                                                      | Gravity Diagnostics                                                                  | Kentucky State Public Health Lab                                                            | Stephanie Lunn, Karim George, Joshua Tobias, William Grooms, Vaneet Arora, Matthew Johnson, Rachel Zinner, Rhonda Lucas                                                                                                                                                                                                                                                                                                                                                                                                                                                                                                                                                                                                                                        |
| EPI_ISL_1315137, EPI_ISL_1315171, EPI_ISL_1315220                                                                                                                                                                                                             | The Jackson Laboratory                                                               | The Jackson Laboratory                                                                      | Bergeron D, Renzette N, Adams M, Omerza G, Kelly K, Li L                                                                                                                                                                                                                                                                                                                                                                                                                                                                                                                                                                                                                                                                                                       |
| EPI_ISL_1315310                                                                                                                                                                                                                                               | Waikato Hospital                                                                     | Institute of Environmental Science and Research (ESR)                                       | Rachel Boyle, SallyAnn Harbison, Olivia Stroeven, Xiaoyun Ren, Matt Storey, Nikki Freed, Muhammad Faisal, Jing Wang, Hermes Perez, Anja Werner, Antje van der Linden, Arlo Upton, Chris Mansell, David Hammer, Dragana Drinkovic, Gary McAuliffe, Hana Sofia Andersson, James Ussher, Jill Sherwood,                                                                                                                                                                                                                                                                                                                                                                                                                                                           |

|                                                                                                                                                                                                                                                                                |                                                                                                             |                                                                                                                                        |                                                                                                                                                                                                                                                                                                                                                                                                                            |
|--------------------------------------------------------------------------------------------------------------------------------------------------------------------------------------------------------------------------------------------------------------------------------|-------------------------------------------------------------------------------------------------------------|----------------------------------------------------------------------------------------------------------------------------------------|----------------------------------------------------------------------------------------------------------------------------------------------------------------------------------------------------------------------------------------------------------------------------------------------------------------------------------------------------------------------------------------------------------------------------|
|                                                                                                                                                                                                                                                                                |                                                                                                             |                                                                                                                                        | Josh Freeman, Julia Howard, Juliet Elvy, Mary DeAlmeida, Matt Blakiston, Matthew Rogers, Max Bloomfield, Michael Addidle, Michelle Balm, Sally Roberts, Sarah Jefferies, Sharmini Mutaiyah, Susan Morpeth, Susan Taylor, Timothy Blackmore, Vani Sathyendran, Veronica Playle, Virginia Hope, Erasmus Smit, Lauren Jelly, Olin Silander, Joep de Lig                                                                       |
| EPI_ISL_1318195                                                                                                                                                                                                                                                                | Department of Clinical Microbiology                                                                         | GIGA Medical Genomics                                                                                                                  | Keith Durkin, Maria Artesi, Sébastien Bontems, Raphaël Boreux, Bouchra Boujemla, Nathalie Renotte, Cécile Meex, Pierrette Melin, Marie-Pierre Hayette, Vincent Bours                                                                                                                                                                                                                                                       |
| EPI_ISL_1318201                                                                                                                                                                                                                                                                | University of Liège COVID-19 testing center                                                                 | GIGA Medical Genomics                                                                                                                  | Keith Durkin, Maria Artesi, Sébastien Bontems, Raphaël Boreux, Bouchra Boujemla, Nathalie Renotte, Cécile Meex, Pierrette Melin, Marie-Pierre Hayette, Vincent Bours                                                                                                                                                                                                                                                       |
| EPI_ISL_1318247                                                                                                                                                                                                                                                                | TN Division of Laboratory Services                                                                          | Genomics and Discovery, Respiratory Viruses Branch, Division of Viral Diseases, Centers for Disease Control and Prevention             | Ying Tao, Jing Zhang, Yan Li, Brian Lynch, Anna Kelleher, Krista Queen, Anna Uehara, Peter Cook, Han Jia Justin Ng, Clinton R. Paden, Haibin Wang, Suxiang Tong                                                                                                                                                                                                                                                            |
| EPI_ISL_1324362, EPI_ISL_1324363                                                                                                                                                                                                                                               | LSUHS Emerging Viral Threat Laboratory                                                                      | Microbial Genome Sequencing Center                                                                                                     | Jeremy P. Kamil, Jennifer L. Carroll, Rona S. Scott, Maarten Van Diest, Andrew D. Yurochko, Christopher G. Kevill, Martin J. Sapp, Daniel J. Snyder, Vaughn S. Cooper, John A. Vanchiere                                                                                                                                                                                                                                   |
| EPI_ISL_1324384, EPI_ISL_1324466                                                                                                                                                                                                                                               | Genome Analysis Center, Kamma Memorial Hospital                                                             | Genome Analysis Center, Kamma Memorial Hospital                                                                                        | Hanako Yazawa, Jun Ishii, Satoko Soma, Kaori Watanabe, Takuya Yazawa, Michiaki Masuda, Hiroshi Kamma                                                                                                                                                                                                                                                                                                                       |
| EPI_ISL_1326070                                                                                                                                                                                                                                                                | Lighthouse Lab in Milton Keynes                                                                             | Wellcome Sanger Institute for the COVID-19 Genomics UK (COG-UK) Consortium                                                             | The Lighthouse Lab in Milton Keynes and Alex Alderton, Roberto Amato, Jeffrey Barrett, Sonia Goncalves, Ewan Harrison, David K. Jackson, Ian Johnston, Dominic Kwiatkowski, Cordelia Langford, John Sillitoe on behalf of the Wellcome Sanger Institute COVID-19 Surveillance Team                                                                                                                                         |
| EPI_ISL_1327391, EPI_ISL_1327460, EPI_ISL_1327507, EPI_ISL_1329295                                                                                                                                                                                                             | Lighthouse Lab in Cambridge                                                                                 | Wellcome Sanger Institute for the COVID-19 Genomics UK (COG-UK) Consortium                                                             | Rob Howes, The Lighthouse Lab in Cambridge and Alex Alderton, Roberto Amato, Jeffrey Barrett, Sonia Goncalves, Ewan Harrison, David K. Jackson, Ian Johnston, Dominic Kwiatkowski, Cordelia Langford, John Sillitoe on behalf of the Wellcome Sanger Institute COVID-19 Surveillance Team                                                                                                                                  |
| EPI_ISL_1335012                                                                                                                                                                                                                                                                | Public Health Ontario Laboratory                                                                            | Public Health Ontario Laboratory                                                                                                       | Vanessa G Allen, Philip Banh, Yao Chen, Richard de Borja, Alireza Eshaghi, Nahuel Fittipaldi, Christine Frantz, Jonathan B Gubby, Jennifer L Guthrie, Lawrence Heisler, Esha Joshi, Michael Laszloffy, Aimin Li, Michael CY Li, Dean Maxwell, Sandeep Nagra, Samir N Patel, Jared Simpson, Karthikeyan Sivaraman, Ashleigh Sullivan, Yogi Sundaravadanam, Sarah Teatero, Andre Villegas, Matthew Watson, Sandra Zittermann |
| EPI_ISL_1336326                                                                                                                                                                                                                                                                | MD PHL                                                                                                      | MD PHL                                                                                                                                 | Maryland Department of Health Laboratories Administration                                                                                                                                                                                                                                                                                                                                                                  |
| EPI_ISL_1337484                                                                                                                                                                                                                                                                | DOHMH Corona                                                                                                | New York City Public Health Laboratory                                                                                                 | Jade Wang, et al.                                                                                                                                                                                                                                                                                                                                                                                                          |
| EPI_ISL_1337926                                                                                                                                                                                                                                                                | Dutch COVID-19 response team                                                                                | Medical Microbiology, Maastricht University Medical Centre                                                                             | Jozef Dingemans*, Brian van der Veer*, Erik Beuken, Carmen Reumkens, Lieke van Alphen, Christian Hoebe, Paul Savelkoul                                                                                                                                                                                                                                                                                                     |
| EPI_ISL_1340033                                                                                                                                                                                                                                                                | Houston Health Dept.                                                                                        | Houston Health Dept.                                                                                                                   | Ryker Penn, Pamela Brown, Adolpho Lara, Yanlai Lai                                                                                                                                                                                                                                                                                                                                                                         |
| EPI_ISL_1340835                                                                                                                                                                                                                                                                | Northwestern Memorial Hospital                                                                              | Northwestern University - Ozer Lab                                                                                                     | Ramon Lorenzo-Redondo, Lacy M. Simons, Taylor J. Dean, Chad J. Achenbach, Lawrence J. Jennings, Chao Qi, Michael G. Ison, Judd F. Hultquist, Egon A. Ozer                                                                                                                                                                                                                                                                  |
| EPI_ISL_1344624                                                                                                                                                                                                                                                                | Lighthouse Lab in Cambridge                                                                                 | Wellcome Sanger Institute for the COVID-19 Genomics UK (COG-UK) Consortium                                                             | Rob Howes, The Lighthouse Lab in Cambridge and Alex Alderton, Roberto Amato, Jeffrey Barrett, Sonia Goncalves, Ewan Harrison, David K. Jackson, Ian Johnston, Dominic Kwiatkowski, Cordelia Langford, John Sillitoe on behalf of the Wellcome Sanger Institute COVID-19 Surveillance Team                                                                                                                                  |
| EPI_ISL_1347096                                                                                                                                                                                                                                                                | Microbiology Department, Laboratori Clinic Metropolitana Nord, Hospital Universitari Germans Trias i Pujol. | Can Ruti SARS-CoV-2 Sequencing Hub (HUGTIP/IRSI/CAIXA/IGTP)                                                                            | Marc Noguera-Julian, Pilar Armengol, Ignacio Blanco, Antoni E Bordoy, Francesc Catala-Moll, Pere-Joan Cardona, Maria Casadellà, Cristina Casañ, Gemma Clara, Bonaventura Clotet, Cristina Esteban, Montserrat Giménez, Mercedes Guerrero, Anna Not, Roger Paredes, Mariona Parera, Verónica Saludes, Alba Sánchez, and Elisa Martró on behalf of the Can Ruti SARS-CoV-2 Sequencing Hub.                                   |
| EPI_ISL_1347514                                                                                                                                                                                                                                                                | ZOTZ KLIMAS MVZ Düsseldorf-Centrum GbR ÜBAG für Labormedizin, Genetik, Zytologie, Pathologie                | Center of Medical Microbiology, Virology, and Hospital Hygiene, University of Duesseldorf                                              | Maximilian Damagnez; Alexander Dilthey; Patrick Finzer; Katrin Hoffmann; Torsten Houwaart; Lisanna Hülse; Malte Kohns Vasconcelos; Nadine Lübke; Jessica Nicolai; Klaus Pfeffer; Daniel Strelow; Jörg Timm; Andreas Walker; Tobias Wienemann; Rainer Zotz                                                                                                                                                                  |
| EPI_ISL_1348120, EPI_ISL_1348160, EPI_ISL_1348170, EPI_ISL_1348171, EPI_ISL_1348180, EPI_ISL_1348182, EPI_ISL_1348186, EPI_ISL_1348193, EPI_ISL_1348202, EPI_ISL_1348222, EPI_ISL_1348238, EPI_ISL_1348240, EPI_ISL_1348244, EPI_ISL_1348249, EPI_ISL_1348250, EPI_ISL_1348254 | see above                                                                                                   | Maryland Genomics, Institute for Genome Sciences, University of Maryland School of Medicine                                            | Tallon, Luke J; Sadzewicz, Lisa D; Humphrys, Mike; Ott, Sandra; Roussey, Holly; Mehta, Aditya; Vavikolanu, Kranthi; Fraser, Claire M; Ravel, Jacques                                                                                                                                                                                                                                                                       |
| EPI_ISL_1349209                                                                                                                                                                                                                                                                | MVZ Labor Krone GbR                                                                                         | Robert Koch Institute                                                                                                                  | unknown                                                                                                                                                                                                                                                                                                                                                                                                                    |
| EPI_ISL_1350094                                                                                                                                                                                                                                                                | Medizinische Laboratorien Düsseldorf                                                                        | Robert Koch Institute                                                                                                                  | unknown                                                                                                                                                                                                                                                                                                                                                                                                                    |
| EPI_ISL_1350265, EPI_ISL_1350278                                                                                                                                                                                                                                               | Procomcure Biotech Germany GmbH                                                                             | Robert Koch Institute                                                                                                                  | unknown                                                                                                                                                                                                                                                                                                                                                                                                                    |
| EPI_ISL_1354965, EPI_ISL_1354983, EPI_ISL_1354995                                                                                                                                                                                                                              | Universitätsklinikum Heidelberg                                                                             | Robert Koch Institute                                                                                                                  | unknown                                                                                                                                                                                                                                                                                                                                                                                                                    |
| EPI_ISL_1358210, EPI_ISL_1358211, EPI_ISL_1358213                                                                                                                                                                                                                              | Department of Virology I, National Institute of Infectious Diseases                                         | Department of Veterinary Science, National Institute of Infectious Diseases                                                            | Yudai Kuroda, Tsukasa Yamamoto, Keita Ishijima, Tadaki Suzuki, Souichi Yamada, Shuetsu Fukushima, Ken Maeda                                                                                                                                                                                                                                                                                                                |
| EPI_ISL_1363764, EPI_ISL_1363770, EPI_ISL_1363771, EPI_ISL_1363780                                                                                                                                                                                                             | Maryland Genomics, Institute for Genome Sciences, University of Maryland School of Medicine                 | Maryland Genomics, Institute for Genome Sciences, University of Maryland School of Medicine                                            | Tallon, Luke J; Sadzewicz, Lisa D; Humphrys, Mike; Ott, Sandra; Roussey, Holly; Mehta, Aditya; Vavikolanu, Kranthi; Fraser, Claire M; Ravel, Jacques                                                                                                                                                                                                                                                                       |
| EPI_ISL_1364597                                                                                                                                                                                                                                                                | Virginia Division of Consolidated Laboratory Services                                                       | Virginia Division of Consolidated Laboratory Services                                                                                  | Virginia DCLS                                                                                                                                                                                                                                                                                                                                                                                                              |
| EPI_ISL_1364670, EPI_ISL_1364723, EPI_ISL_1364739, EPI_ISL_1364758, EPI_ISL_1364774                                                                                                                                                                                            | Arizona State University                                                                                    | Arizona State University                                                                                                               | Peter T. Skidmore, LaRinda A. Holland, Rabia Maqsood, Emily A. Kaelin, Nicholas J. Mellor, Kristina Buss, Joy M. Blain, Neal W Woodbury, Valerie Harris, Joshua LaBaer, Vel Murugan, Efrém S. Lim                                                                                                                                                                                                                          |
| EPI_ISL_1364903                                                                                                                                                                                                                                                                | Bundeswehrzentral Krankenhaus Koblenz                                                                       | Bundeswehr Institute of Microbiology                                                                                                   | Markus Antwerpen, Alexandra Rehn, Mathias Walter, Malena Bestehorn-Willmann, Mike Pillukat, Sabine Zange, Enrico Georgi, Roman Wölfel                                                                                                                                                                                                                                                                                      |
| EPI_ISL_1366176                                                                                                                                                                                                                                                                | UW Virology Lab                                                                                             | UW Virology Lab                                                                                                                        | Pavitra Roychoudhury, Hong Xie, Lasata Shrestha, Shah Mohamed Bakhsh, Michelle Lin, Noah R. Baker, Sean Ellis, Saraswathi Sathees, Meei-Li Huang, Keith R Jerome, Alexander Greninger                                                                                                                                                                                                                                      |
| EPI_ISL_1369463                                                                                                                                                                                                                                                                | CHUV                                                                                                        | Laboratory of genomics and metagenomics, Institute of Microbiology, University Hospital Centre and University of Lausanne, Switzerland | Trestan Pillonel, Damien Jacot, Sébastien Aeby, Gilbert Greub, Claire Bertelli                                                                                                                                                                                                                                                                                                                                             |
| EPI_ISL_1370682, EPI_ISL_1371431, EPI_ISL_1371459                                                                                                                                                                                                                              | Dutch COVID-19 response team                                                                                | National Institute for Public Health and the Environment (RIVM)                                                                        | Adam Meijer, Harry Vennema, Dirk Eggink, Jeroen Cremer, Sharon van den Brink, Bas van der Veer, AnneMarie van den Brandt, Florian Zwagemaker, Dennis Schmitz, Chantal Reusken, on behalf of the national COVID-19 response team                                                                                                                                                                                            |
| EPI_ISL_1371709, EPI_ISL_1371718                                                                                                                                                                                                                                               | Virginia Division of Consolidated Laboratory Services                                                       | Virginia Division of Consolidated Laboratory Services                                                                                  | Virginia DCLS                                                                                                                                                                                                                                                                                                                                                                                                              |
| EPI_ISL_1373319, EPI_ISL_1373322, EPI_ISL_1373323, EPI_ISL_1373328, EPI_ISL_1373355, EPI_ISL_1373356                                                                                                                                                                           | MD PHL                                                                                                      | MD PHL                                                                                                                                 | Maryland Department of Health Laboratories Administration                                                                                                                                                                                                                                                                                                                                                                  |
| EPI_ISL_1373445                                                                                                                                                                                                                                                                | UNC-CH COVID Surveillance Lab                                                                               | Jeremy Wang                                                                                                                            | Jeremy Wang, Alexander Rubinsteyn, Melissa Miller, Corbin Jones, Amy James Loftis, Amir Barzin, Susan Fiscus                                                                                                                                                                                                                                                                                                               |
| EPI_ISL_1373547                                                                                                                                                                                                                                                                | Vault Health                                                                                                | Minnesota Department of Health, Public Health Laboratory                                                                               | Alexandra Lorentz, Jacob Garfin, Matt Plumb, and Xiong Wang                                                                                                                                                                                                                                                                                                                                                                |
| EPI_ISL_1374224                                                                                                                                                                                                                                                                | Lighthouse Lab in Cambridge                                                                                 | Wellcome Sanger Institute for the COVID-19 Genomics UK (COG-UK) Consortium                                                             | Rob Howes, The Lighthouse Lab in Cambridge and Alex Alderton, Roberto Amato, Jeffrey Barrett, Sonia Goncalves, Ewan Harrison, David K. Jackson, Ian Johnston, Dominic Kwiatkowski, Cordelia Langford, John Sillitoe on behalf of the Wellcome Sanger Institute COVID-19 Surveillance Team                                                                                                                                  |
| EPI_ISL_1378794, EPI_ISL_1378795, EPI_ISL_1378796, EPI_ISL_1378800                                                                                                                                                                                                             | Tempus                                                                                                      | Grubaug Lab - Yale School of Public Health                                                                                             | Joseph Fauver, Mallery Breban, Isabell Ott, Tara Alpert, Mary Petrone, Anderson Brito, Chantal Vogels, Annie Watkins, Chaney Kalinich, Jessica Rothman, Matthew J. MacKay, Gaurav Khullar, Jessica Metti, Joel T. Dudley, Megan Nash, Nike Beaubier, Christopher E. Mason, Nathan Grubaug                                                                                                                                  |
| EPI_ISL_1378822, EPI_ISL_1378823, EPI_ISL_1378828                                                                                                                                                                                                                              | Murphy Medical Association                                                                                  | Grubaug Lab - Yale School of Public Health                                                                                             | Joseph Fauver, Mallery Breban, Isabell Ott, Tara Alpert, Mary Petrone, Anderson Brito, Chantal Vogels, Annie Watkins, Chaney Kalinich, Jessica Rothman, Caleb Neal, Eva Laszlo, Steven Murphy, Nathan Grubaug                                                                                                                                                                                                              |

|                                                                                                                                                                                                                                                                                                                                                    |                                                                                                             |                                                                                             |                                                                                                                                                                                                                                                                                                                                                                                                                                                                                                                                                                                                |
|----------------------------------------------------------------------------------------------------------------------------------------------------------------------------------------------------------------------------------------------------------------------------------------------------------------------------------------------------|-------------------------------------------------------------------------------------------------------------|---------------------------------------------------------------------------------------------|------------------------------------------------------------------------------------------------------------------------------------------------------------------------------------------------------------------------------------------------------------------------------------------------------------------------------------------------------------------------------------------------------------------------------------------------------------------------------------------------------------------------------------------------------------------------------------------------|
| EPI_ISL_1379274, EPI_ISL_1379326, EPI_ISL_1379332                                                                                                                                                                                                                                                                                                  | Hackensack Meridian Health                                                                                  | New York Genome Center                                                                      | Michael Zody, Andre Corvelo, Dayna M. Oschwald, Samantha Fennessey, Tom Maniatis, Liang Chen, Jose Mediavilla, Marcus Cunningham, Kaelea Composto, Kar Chow, David Perlin, Barry Kreiswirth                                                                                                                                                                                                                                                                                                                                                                                                    |
| EPI_ISL_1381885, EPI_ISL_1381886, EPI_ISL_1381887, EPI_ISL_1381888, EPI_ISL_1381889                                                                                                                                                                                                                                                                | Virginia Division of Consolidated Laboratory Services                                                       | Virginia Division of Consolidated Laboratory Services                                       | Virginia DCLS                                                                                                                                                                                                                                                                                                                                                                                                                                                                                                                                                                                  |
| EPI_ISL_1382071                                                                                                                                                                                                                                                                                                                                    | Department of Clinical Microbiology                                                                         | GIGA Medical Genomics                                                                       | Keith Durkin, Maria Artesi, Sébastien Bontems, Raphaël Boreux, Bouchra Boujemla, Nathalie Renotte, Cécile Meex, Pierrette Melin, Marie-Pierre Hayette, Vincent Bours                                                                                                                                                                                                                                                                                                                                                                                                                           |
| EPI_ISL_1382072                                                                                                                                                                                                                                                                                                                                    | University of Liège COVID-19 testing center                                                                 | GIGA Medical Genomics                                                                       | Keith Durkin, Maria Artesi, Sébastien Bontems, Raphaël Boreux, Bouchra Boujemla, Nathalie Renotte, Cécile Meex, Pierrette Melin, Marie-Pierre Hayette, Vincent Bours                                                                                                                                                                                                                                                                                                                                                                                                                           |
| EPI_ISL_1382073                                                                                                                                                                                                                                                                                                                                    | Department of Clinical Microbiology                                                                         | GIGA Medical Genomics                                                                       | Keith Durkin, Maria Artesi, Sébastien Bontems, Raphaël Boreux, Bouchra Boujemla, Nathalie Renotte, Cécile Meex, Pierrette Melin, Marie-Pierre Hayette, Vincent Bours                                                                                                                                                                                                                                                                                                                                                                                                                           |
| EPI_ISL_1382078, EPI_ISL_1382107, EPI_ISL_1382108                                                                                                                                                                                                                                                                                                  | Virginia Division of Consolidated Laboratory Services                                                       | Virginia Division of Consolidated Laboratory Services                                       | Virginia DCLS                                                                                                                                                                                                                                                                                                                                                                                                                                                                                                                                                                                  |
| EPI_ISL_1384922, EPI_ISL_1385148, EPI_ISL_1385149, EPI_ISL_1385293, EPI_ISL_1385357, EPI_ISL_1385422, EPI_ISL_1385507, EPI_ISL_1385539, EPI_ISL_1385593, EPI_ISL_1385714, EPI_ISL_1385764                                                                                                                                                          | see above                                                                                                   | Pandemic Response Lab - NYC                                                                 | Pandemic Response Lab, R&D                                                                                                                                                                                                                                                                                                                                                                                                                                                                                                                                                                     |
| EPI_ISL_1386037, EPI_ISL_1386038                                                                                                                                                                                                                                                                                                                   | Microbiology Department, Laboratori Clínic Metropolitana Nord. Hospital Universitari Germans Trias i Pujol. | Can Ruti SARS-CoV-2 Sequencing Hub (HUGTIP/IRSI/CAIXA/IGTP)                                 | Marc Noguera-Julian, Pilar Armengol, Ignacio Blanco, Antoni E Bordo, Francesc Catala-Moll, Pere-Joan Cardona, Maria Casadellà, Cristina Casañ, Gemma Clara, Bonaventura Clotet, Cristina Esteban, Montserrat Giménez, Mercedes Guerrero, Anna Not, Roger Paredes, Mariona Parera, Verónica Saludes, Alba Sánchez, and Elisa Martró on behalf of the Can Ruti SARS-CoV-2 Sequencing Hub.                                                                                                                                                                                                        |
| EPI_ISL_1389336                                                                                                                                                                                                                                                                                                                                    | Labo Analyses Med                                                                                           | National Reference Center for Viruses of Respiratory Infections, Institut Pasteur, Paris    | Marion Barbet, Sylvie Behillil, Méline Bizard, Angela Brisebarre, Camille Capel, Louise Lefrançois, Etienne Simon-Lorière, Vincent Enouf, Maud Vanpeene, Sylvie van der Werf, Felloni Claire                                                                                                                                                                                                                                                                                                                                                                                                   |
| EPI_ISL_1391378                                                                                                                                                                                                                                                                                                                                    | DC Public Health Lab/ Dept. of Forensic Sciences                                                            | DC Public Health Lab/ Dept. of Forensic Sciences                                            | Janis Doss, Scott Nguyen, Elizabeth Zelaya, Sarah Scott, Connie Maza, Monica Mann, Brittany Hamilton, David Payne, Jocelyn Hauser                                                                                                                                                                                                                                                                                                                                                                                                                                                              |
| EPI_ISL_1391992                                                                                                                                                                                                                                                                                                                                    | Helix/Illumina                                                                                              | Centers for Disease Control and Prevention Division of Viral Diseases, Pathogen Discovery   | Peter W. Cook, Dakota Howard, Dhvani Batra, Ben L. Rambo-Martin, Eileen de Feo, Jan Antico, Christine Tran, Matthew Tolentino, Shannon Wickline, Kim Gietzen, Brad Sickler, Jingtao Liu, Eric Allen, Phil Febbo, Summer Galloway, Nicole L. Washington, Simon White, Geraint Levan, Kelly Schiabor Barrett, Elizabeth Cirulli, Alexandre Bolze, Ary Ascencio, Charlotte Rivera-García, Ryan Cho, Jason Nguyen, Sherry Wang, Jimmy Ramirez, Tyler Cassens, Efen Sandoval, Magnus Isaksson, William Lee, David Becker, Marc Laurent, James Lu, Clinton R. Paden, Suxiang Tong, Duncan MacCannell |
| EPI_ISL_1393289, EPI_ISL_1393291, EPI_ISL_1393292                                                                                                                                                                                                                                                                                                  | Servicio de Microbiología Clínica (Complejo Hospitalario de Navarra, Pamplona)                              | Centro de Secuenciación NASERTIC                                                            | Carmen Ezpeleta Baquedano, Ana Navascués, Ana Miqueleiz                                                                                                                                                                                                                                                                                                                                                                                                                                                                                                                                        |
| EPI_ISL_1394610                                                                                                                                                                                                                                                                                                                                    | WESTCHESTER MEDICAL CENTER                                                                                  | Wadsworth Center, New York State Department of Health                                       | Kirsten St. George, Daryl M. Lamson, Alexis Russel, Matthew Shudt, Melissa A Leisner, Jonathan Plitnick, Navjot Singh, John Kelly, Erasmus Schneider, Erica Lasek-Nesselquist                                                                                                                                                                                                                                                                                                                                                                                                                  |
| EPI_ISL_1397592, EPI_ISL_1397609                                                                                                                                                                                                                                                                                                                   | SUNY UPSTATE MEDICAL UNIVERSITY                                                                             | Wadsworth Center, New York State Department of Health                                       | Kirsten St. George, Daryl M. Lamson, Alexis Russel, Matthew Shudt, Melissa A Leisner, Jonathan Plitnick, Navjot Singh, John Kelly, Erasmus Schneider, Erica Lasek-Nesselquist                                                                                                                                                                                                                                                                                                                                                                                                                  |
| EPI_ISL_1397699                                                                                                                                                                                                                                                                                                                                    | BIO-REFERENCE LABORATORIES                                                                                  | Wadsworth Center, New York State Department of Health                                       | Kirsten St. George, Daryl M. Lamson, Alexis Russel, Matthew Shudt, Melissa A Leisner, Jonathan Plitnick, Navjot Singh, John Kelly, Erasmus Schneider, Erica Lasek-Nesselquist                                                                                                                                                                                                                                                                                                                                                                                                                  |
| EPI_ISL_1397787                                                                                                                                                                                                                                                                                                                                    | SUNY UPSTATE MEDICAL UNIVERSITY                                                                             | Wadsworth Center, New York State Department of Health                                       | Kirsten St. George, Daryl M. Lamson, Alexis Russel, Matthew Shudt, Melissa A Leisner, Jonathan Plitnick, Navjot Singh, John Kelly, Erasmus Schneider, Erica Lasek-Nesselquist                                                                                                                                                                                                                                                                                                                                                                                                                  |
| EPI_ISL_1397853, EPI_ISL_1397869                                                                                                                                                                                                                                                                                                                   | ALBANY MEDICAL CENTER                                                                                       | Wadsworth Center, New York State Department of Health                                       | Kirsten St. George, Daryl M. Lamson, Alexis Russel, Matthew Shudt, Melissa A Leisner, Jonathan Plitnick, Navjot Singh, John Kelly, Erasmus Schneider, Erica Lasek-Nesselquist                                                                                                                                                                                                                                                                                                                                                                                                                  |
| EPI_ISL_1398093                                                                                                                                                                                                                                                                                                                                    | NORTHWELL HEALTH LABORATORIES                                                                               | Wadsworth Center, New York State Department of Health                                       | Kirsten St. George, Daryl M. Lamson, Alexis Russel, Matthew Shudt, Melissa A Leisner, Jonathan Plitnick, Navjot Singh, John Kelly, Erasmus Schneider, Erica Lasek-Nesselquist                                                                                                                                                                                                                                                                                                                                                                                                                  |
| EPI_ISL_1398144                                                                                                                                                                                                                                                                                                                                    | Columbia University Irving Medical Center                                                                   | Wadsworth Center, New York State Department of Health                                       | Kirsten St. George, Daryl M. Lamson, Alexis Russel, Matthew Shudt, Melissa A Leisner, Jonathan Plitnick, Navjot Singh, John Kelly, Erasmus Schneider, Erica Lasek-Nesselquist                                                                                                                                                                                                                                                                                                                                                                                                                  |
| EPI_ISL_1398149                                                                                                                                                                                                                                                                                                                                    | ALBANY MEDICAL CENTER                                                                                       | Wadsworth Center, New York State Department of Health                                       | Kirsten St. George, Daryl M. Lamson, Alexis Russel, Matthew Shudt, Melissa A Leisner, Jonathan Plitnick, Navjot Singh, John Kelly, Erasmus Schneider, Erica Lasek-Nesselquist                                                                                                                                                                                                                                                                                                                                                                                                                  |
| EPI_ISL_1398159, EPI_ISL_1398160                                                                                                                                                                                                                                                                                                                   | SUNY UPSTATE MEDICAL UNIVERSITY                                                                             | Wadsworth Center, New York State Department of Health                                       | Kirsten St. George, Daryl M. Lamson, Alexis Russel, Matthew Shudt, Melissa A Leisner, Jonathan Plitnick, Navjot Singh, John Kelly, Erasmus Schneider, Erica Lasek-Nesselquist                                                                                                                                                                                                                                                                                                                                                                                                                  |
| EPI_ISL_1398257                                                                                                                                                                                                                                                                                                                                    | KALEIDA CENTER FOR LABORATORY MEDICINE                                                                      | Wadsworth Center, New York State Department of Health                                       | Kirsten St. George, Daryl M. Lamson, Alexis Russel, Matthew Shudt, Melissa A Leisner, Jonathan Plitnick, Navjot Singh, John Kelly, Erasmus Schneider, Erica Lasek-Nesselquist                                                                                                                                                                                                                                                                                                                                                                                                                  |
| EPI_ISL_1398274, EPI_ISL_1398275, EPI_ISL_1398277                                                                                                                                                                                                                                                                                                  | ALBANY MEDICAL CENTER                                                                                       | Wadsworth Center, New York State Department of Health                                       | Kirsten St. George, Daryl M. Lamson, Alexis Russel, Matthew Shudt, Melissa A Leisner, Jonathan Plitnick, Navjot Singh, John Kelly, Erasmus Schneider, Erica Lasek-Nesselquist                                                                                                                                                                                                                                                                                                                                                                                                                  |
| EPI_ISL_1399579                                                                                                                                                                                                                                                                                                                                    | Instituto Nacional de Saude (INSA)                                                                          | Instituto Nacional de Saude (INSA)                                                          | Borges et al                                                                                                                                                                                                                                                                                                                                                                                                                                                                                                                                                                                   |
| EPI_ISL_1400837, EPI_ISL_1400849, EPI_ISL_1400860, EPI_ISL_1400862, EPI_ISL_1400872, EPI_ISL_1400875, EPI_ISL_1400877, EPI_ISL_1400878, EPI_ISL_1400879, EPI_ISL_1400887, EPI_ISL_1400892, EPI_ISL_1400893, EPI_ISL_1400895, EPI_ISL_1400896, EPI_ISL_1400897, EPI_ISL_1400898, EPI_ISL_1400912, EPI_ISL_1400913, EPI_ISL_1400922, EPI_ISL_1400932 | see above                                                                                                   | Maryland Genomics, Institute for Genome Sciences, University of Maryland School of Medicine | Maryland Genomics, Institute for Genome Sciences, University of Maryland School of Medicine                                                                                                                                                                                                                                                                                                                                                                                                                                                                                                    |
| EPI_ISL_1402805, EPI_ISL_1402832, EPI_ISL_1402861, EPI_ISL_1402870, EPI_ISL_1402876, EPI_ISL_1402914                                                                                                                                                                                                                                               | Johns Hopkins Hospital Department of Pathology                                                              | Johns Hopkins Hospital Department of Pathology                                              | C. Paul Morris, Chun Huai Luo, Adannaya Amadi, Matthew Schwartz, Heba H. Mostafa                                                                                                                                                                                                                                                                                                                                                                                                                                                                                                               |
| EPI_ISL_1402987, EPI_ISL_1402996, EPI_ISL_1403023, EPI_ISL_1403032                                                                                                                                                                                                                                                                                 | Hospital of the University of Pennsylvania Molecular Pathology Lab                                          | Bushman Lab - University of Pennsylvania                                                    | John Everett, Kyle Rodino, Shantan Reddy, Pascha Hokama, Aoife M. Roche, Young Hwang, Abigail Glascock, Scott Sherrill-Mix, Samantha A. Whiteside, Jevon Graham-Wooten, Layla A. Khatib, Ayannah S. Fitzgerald, Arupa Ganguly, Mike Feldman, Brendan Kelly, Ronald G. Collman and Frederic Bushman                                                                                                                                                                                                                                                                                             |
| EPI_ISL_1403814                                                                                                                                                                                                                                                                                                                                    | University of Wisconsin-Madison AIDS Vaccine Research Laboratories                                          | University of Wisconsin-Madison AIDS Vaccine Research Laboratories                          | Gage Moreno, Katarina Braun, et al. AIDS Vaccine Research Laboratories                                                                                                                                                                                                                                                                                                                                                                                                                                                                                                                         |
| EPI_ISL_1405030                                                                                                                                                                                                                                                                                                                                    | NJDOH, Public Health and Environmental Laboratories                                                         | New Jersey Public Health and Environmental Laboratories (NJ PHEL)                           | Lindsey Bodnar, Shiv K. Verma, Dana Woell, Byeong Jeong                                                                                                                                                                                                                                                                                                                                                                                                                                                                                                                                        |
| EPI_ISL_1405105, EPI_ISL_1405111, EPI_ISL_1405279                                                                                                                                                                                                                                                                                                  | UW Virology Lab                                                                                             | UW Virology Lab                                                                             | Pavitra Roychoudhury, Hong Xie, Lasata Shrestha, Shah Mohamed Bakhsh, Michelle Lin, Noah R. Baker, Sean Ellis, Saraswathi Sathees, Meei-Li Huang, Keith R Jerome, Alexander Greninger                                                                                                                                                                                                                                                                                                                                                                                                          |
| EPI_ISL_1405565, EPI_ISL_1405573, EPI_ISL_1405577                                                                                                                                                                                                                                                                                                  | Johns Hopkins Hospital Department of Pathology                                                              | Johns Hopkins Hospital Department of Pathology                                              | C. Paul Morris, Chun Huai Luo, Adannaya Amadi, Matthew Schwartz, Heba H. Mostafa                                                                                                                                                                                                                                                                                                                                                                                                                                                                                                               |
| EPI_ISL_1405980, EPI_ISL_1406020                                                                                                                                                                                                                                                                                                                   | Microbiology Department, Laboratori Clínic Metropolitana Nord. Hospital Universitari Germans Trias i Pujol. | Can Ruti SARS-CoV-2 Sequencing Hub (HUGTIP/IRSI/CAIXA/IGTP)                                 | Marc Noguera-Julian, Pilar Armengol, Ignacio Blanco, Antoni E Bordo, Francesc Catala-Moll, Pere-Joan Cardona, Maria Casadellà, Cristina Casañ, Gemma Clara, Bonaventura Clotet, Cristina Esteban, Montserrat Giménez, Mercedes Guerrero, Anna Not, Roger Paredes, Mariona Parera, Verónica Saludes, Alba Sánchez, and Elisa Martró on behalf of the Can Ruti SARS-CoV-2 Sequencing Hub.                                                                                                                                                                                                        |

|                                                                                                                                                                                                                                                                                                                                                                                                                                                                                                                                                                                                                                                                                                                                                                                                                                                                                                                                                                                                                                                                                                                                                                                                                                                                                                                                                                                                                                                                                                                                                                                                                                                                                                                                                                                                                                                                                                                                              |                                                                           |                                                                               |                                                                                                                                                                                                                                                                                                                                                                                                                                      |
|----------------------------------------------------------------------------------------------------------------------------------------------------------------------------------------------------------------------------------------------------------------------------------------------------------------------------------------------------------------------------------------------------------------------------------------------------------------------------------------------------------------------------------------------------------------------------------------------------------------------------------------------------------------------------------------------------------------------------------------------------------------------------------------------------------------------------------------------------------------------------------------------------------------------------------------------------------------------------------------------------------------------------------------------------------------------------------------------------------------------------------------------------------------------------------------------------------------------------------------------------------------------------------------------------------------------------------------------------------------------------------------------------------------------------------------------------------------------------------------------------------------------------------------------------------------------------------------------------------------------------------------------------------------------------------------------------------------------------------------------------------------------------------------------------------------------------------------------------------------------------------------------------------------------------------------------|---------------------------------------------------------------------------|-------------------------------------------------------------------------------|--------------------------------------------------------------------------------------------------------------------------------------------------------------------------------------------------------------------------------------------------------------------------------------------------------------------------------------------------------------------------------------------------------------------------------------|
| EPI_ISL_1407256, EPI_ISL_1407282, EPI_ISL_1407292, EPI_ISL_1413173, EPI_ISL_1413226, EPI_ISL_1413238, EPI_ISL_1413249, EPI_ISL_1413274, EPI_ISL_1413434, EPI_ISL_1413511                                                                                                                                                                                                                                                                                                                                                                                                                                                                                                                                                                                                                                                                                                                                                                                                                                                                                                                                                                                                                                                                                                                                                                                                                                                                                                                                                                                                                                                                                                                                                                                                                                                                                                                                                                     | Broad Institute Clinical Research Sequencing Platform                     | Infectious Disease Program, Broad Institute of Harvard and MIT                | Siddle,K.J., Adams,G., Peariman,L., Gladden-Young,A., Vicente,G., Blumenstiel,B., DeFelice,M., Lee,M., McGovern,S., Lagerborg,K., Rudy,M., DeRuff,K., Carter,A., Normandin,E., Bauer,M., Reilly,S., Tomkins-Tinch,C., Loreth,C., Chaluvadi,S., Meldrim,J., Granger,B., Lemieux,J.E., Birren,B.W., Sabeti,P.C., Larkin,K., Dodge,S., Lennon,N., Madoff,L., Brown,C., Gallagher,G., Smole,S., Park,D.J., Gabriel,S., and MacInnis,B.L. |
| EPI_ISL_1413574                                                                                                                                                                                                                                                                                                                                                                                                                                                                                                                                                                                                                                                                                                                                                                                                                                                                                                                                                                                                                                                                                                                                                                                                                                                                                                                                                                                                                                                                                                                                                                                                                                                                                                                                                                                                                                                                                                                              | Rhode Island Department of Health                                         | Infectious Disease Program, Broad Institute of Harvard and MIT                | Siddle,K.J., Azevedo,K., Miller,A., Adams,G., Pearlman,L., Gladden-Young,A., Lagerborg,K., Rudy,M., DeRuff,K., Carter,A., Normandin,E., Bauer,M., Reilly,S., Tomkins-Tinch,C., Loreth,C., Chaluvadi,S., Lemieux,J.E., Birren,B.W., Sabeti,P.C., Huard,R., King,E., Park,D.J., and MacInnis,B.L.                                                                                                                                      |
| EPI_ISL_1418775, EPI_ISL_1418776                                                                                                                                                                                                                                                                                                                                                                                                                                                                                                                                                                                                                                                                                                                                                                                                                                                                                                                                                                                                                                                                                                                                                                                                                                                                                                                                                                                                                                                                                                                                                                                                                                                                                                                                                                                                                                                                                                             | Swedish national genomic surveillance program of SARS-CoV-2               | The Public Health Agency of Sweden                                            | Swedish national genomic surveillance program of SARS-CoV-2                                                                                                                                                                                                                                                                                                                                                                          |
| EPI_ISL_1421495                                                                                                                                                                                                                                                                                                                                                                                                                                                                                                                                                                                                                                                                                                                                                                                                                                                                                                                                                                                                                                                                                                                                                                                                                                                                                                                                                                                                                                                                                                                                                                                                                                                                                                                                                                                                                                                                                                                              | Wisconsin State Laboratory of Hygiene Communicable Disease Division       | Wisconsin State Laboratory of Hygiene Communicable Disease Division           | Kelsey R. Florek, Abigail C. Shockey                                                                                                                                                                                                                                                                                                                                                                                                 |
| EPI_ISL_1423188                                                                                                                                                                                                                                                                                                                                                                                                                                                                                                                                                                                                                                                                                                                                                                                                                                                                                                                                                                                                                                                                                                                                                                                                                                                                                                                                                                                                                                                                                                                                                                                                                                                                                                                                                                                                                                                                                                                              | WVU Rapid Development Laboratory                                          | WVU and Marshall University Combined Genomics Core Facilities                 | "James Denvir, Peter Stoilov, Peter Perrotta, Wesley Kimble, Ryan Percifield"                                                                                                                                                                                                                                                                                                                                                        |
| EPI_ISL_1423220                                                                                                                                                                                                                                                                                                                                                                                                                                                                                                                                                                                                                                                                                                                                                                                                                                                                                                                                                                                                                                                                                                                                                                                                                                                                                                                                                                                                                                                                                                                                                                                                                                                                                                                                                                                                                                                                                                                              | Berkeley Medical Center                                                   | WVU and Marshall University Combined Genomics Core Facilities                 | "James Denvir, Peter Stoilov, Peter Perrotta, Wesley Kimble, Ryan Percifield"                                                                                                                                                                                                                                                                                                                                                        |
| EPI_ISL_1423274                                                                                                                                                                                                                                                                                                                                                                                                                                                                                                                                                                                                                                                                                                                                                                                                                                                                                                                                                                                                                                                                                                                                                                                                                                                                                                                                                                                                                                                                                                                                                                                                                                                                                                                                                                                                                                                                                                                              | LabCorp Dublin                                                            | WVU and Marshall University Combined Genomics Core Facilities                 | "James Denvir, Peter Stoilov, Peter Perrotta, Wesley Kimble, Ryan Percifield"                                                                                                                                                                                                                                                                                                                                                        |
| EPI_ISL_1423450                                                                                                                                                                                                                                                                                                                                                                                                                                                                                                                                                                                                                                                                                                                                                                                                                                                                                                                                                                                                                                                                                                                                                                                                                                                                                                                                                                                                                                                                                                                                                                                                                                                                                                                                                                                                                                                                                                                              | NYU Langone Health                                                        | Departments of Pathology and Medicine, New York University School of Medicine | Adriana Heguy, Dacia Dimartino, Emily Guzman, Christian Marier, Peter Meyn, Sitharam Ramaswami, Gael Westby, Paul Zappile, Yutong Zhang, Paolo Cotzia, Guiqing Wang                                                                                                                                                                                                                                                                  |
| EPI_ISL_1425101, EPI_ISL_1425123, EPI_ISL_1425206, EPI_ISL_1425253, EPI_ISL_1425458, EPI_ISL_1425490                                                                                                                                                                                                                                                                                                                                                                                                                                                                                                                                                                                                                                                                                                                                                                                                                                                                                                                                                                                                                                                                                                                                                                                                                                                                                                                                                                                                                                                                                                                                                                                                                                                                                                                                                                                                                                         | Department of Infectious Diseases, Kobe Institute of Health               | Department of Infectious Diseases, Kobe Institute of Health                   | Ryohei Nomoto, Noriko Nakanishi, Tomotada Iwamoto, Tsuyoshi Sekizuka, Kentaro Itokawa, Rina Tanaka, Masanori Hashino, Makoto Kuroda                                                                                                                                                                                                                                                                                                  |
| EPI_ISL_1425698                                                                                                                                                                                                                                                                                                                                                                                                                                                                                                                                                                                                                                                                                                                                                                                                                                                                                                                                                                                                                                                                                                                                                                                                                                                                                                                                                                                                                                                                                                                                                                                                                                                                                                                                                                                                                                                                                                                              | Pathogen Genomics Center, National Institute of Infectious Diseases       | Pathogen Genomics Center, National Institute of Infectious Diseases           | Tsuyoshi Sekizuka, Kentaro Itokawa, Rina Tanaka, Masanori Hashino, Makoto Kuroda                                                                                                                                                                                                                                                                                                                                                     |
| EPI_ISL_1425719                                                                                                                                                                                                                                                                                                                                                                                                                                                                                                                                                                                                                                                                                                                                                                                                                                                                                                                                                                                                                                                                                                                                                                                                                                                                                                                                                                                                                                                                                                                                                                                                                                                                                                                                                                                                                                                                                                                              | SARS-CoV-2 testing team, National Institute of Infectious Diseases        | Pathogen Genomics Center, National Institute of Infectious Diseases           | Tsuyoshi Sekizuka, Kentaro Itokawa, Rina Tanaka, Masanori Hashino, Koichi Ishikawa, Midori Nakamura-Hoshi, Shigeru Kusagawa, Makoto Kuroda                                                                                                                                                                                                                                                                                           |
| EPI_ISL_1425720                                                                                                                                                                                                                                                                                                                                                                                                                                                                                                                                                                                                                                                                                                                                                                                                                                                                                                                                                                                                                                                                                                                                                                                                                                                                                                                                                                                                                                                                                                                                                                                                                                                                                                                                                                                                                                                                                                                              | SARS-CoV-2 testing team, National Institute of Infectious Diseases        | Pathogen Genomics Center, National Institute of Infectious Diseases           | Tsuyoshi Sekizuka, Kentaro Itokawa, Rina Tanaka, Masanori Hashino, Eri Nakayama, Motohiko Ogawa, Takahiro Maeki, Shigeru Tanjima, Chang-Kweng Lim, Makoto Kuroda                                                                                                                                                                                                                                                                     |
| EPI_ISL_1425721, EPI_ISL_1425722, EPI_ISL_1425724                                                                                                                                                                                                                                                                                                                                                                                                                                                                                                                                                                                                                                                                                                                                                                                                                                                                                                                                                                                                                                                                                                                                                                                                                                                                                                                                                                                                                                                                                                                                                                                                                                                                                                                                                                                                                                                                                            | Pathogen Genomics Center, National Institute of Infectious Diseases       | Pathogen Genomics Center, National Institute of Infectious Diseases           | Tsuyoshi Sekizuka, Kentaro Itokawa, Rina Tanaka, Masanori Hashino, Makoto Kuroda                                                                                                                                                                                                                                                                                                                                                     |
| EPI_ISL_1425725, EPI_ISL_1425726, EPI_ISL_1425727, EPI_ISL_1425728, EPI_ISL_1425729, EPI_ISL_1425730, EPI_ISL_1425731, EPI_ISL_1425732, EPI_ISL_1425733, EPI_ISL_1425734                                                                                                                                                                                                                                                                                                                                                                                                                                                                                                                                                                                                                                                                                                                                                                                                                                                                                                                                                                                                                                                                                                                                                                                                                                                                                                                                                                                                                                                                                                                                                                                                                                                                                                                                                                     | SARS-CoV-2 testing team, National Institute of Infectious Diseases        | Pathogen Genomics Center, National Institute of Infectious Diseases           | Tsuyoshi Sekizuka, Kentaro Itokawa, Rina Tanaka, Masanori Hashino, Shigeru Tanjima, Eri Nakayama, Takahiro Maeki, Motohiko Ogawa, Chang-Kweng Lim, Makoto Kuroda                                                                                                                                                                                                                                                                     |
| EPI_ISL_1425735, EPI_ISL_1425736, EPI_ISL_1425737, EPI_ISL_1425738, EPI_ISL_1425739, EPI_ISL_1425748                                                                                                                                                                                                                                                                                                                                                                                                                                                                                                                                                                                                                                                                                                                                                                                                                                                                                                                                                                                                                                                                                                                                                                                                                                                                                                                                                                                                                                                                                                                                                                                                                                                                                                                                                                                                                                         | Saitama Prefectural Institute of Public Health                            | Pathogen Genomics Center, National Institute of Infectious Diseases           | Tsuyoshi Sekizuka, Kentaro Itokawa, Rina Tanaka, Masanori Hashino, Makoto Kuroda                                                                                                                                                                                                                                                                                                                                                     |
| EPI_ISL_1426646                                                                                                                                                                                                                                                                                                                                                                                                                                                                                                                                                                                                                                                                                                                                                                                                                                                                                                                                                                                                                                                                                                                                                                                                                                                                                                                                                                                                                                                                                                                                                                                                                                                                                                                                                                                                                                                                                                                              | Pathogen Genomics Center, National Institute of Infectious Diseases       | Pathogen Genomics Center, National Institute of Infectious Diseases           | Tsuyoshi Sekizuka, Kentaro Itokawa, Rina Tanaka, Masanori Hashino, Makoto Kuroda                                                                                                                                                                                                                                                                                                                                                     |
| EPI_ISL_1426648, EPI_ISL_1426649                                                                                                                                                                                                                                                                                                                                                                                                                                                                                                                                                                                                                                                                                                                                                                                                                                                                                                                                                                                                                                                                                                                                                                                                                                                                                                                                                                                                                                                                                                                                                                                                                                                                                                                                                                                                                                                                                                             | SARS-CoV-2 testing team, National Institute of Infectious Diseases        | Pathogen Genomics Center, National Institute of Infectious Diseases           | Tsuyoshi Sekizuka, Kentaro Itokawa, Rina Tanaka, Masanori Hashino, Hidemasa Izumiya, Hideyuki Takahashi, Masatomo Morita, Nobuo Koizumi, , Makoto Kuroda                                                                                                                                                                                                                                                                             |
| EPI_ISL_1426650, EPI_ISL_1426651, EPI_ISL_1426652                                                                                                                                                                                                                                                                                                                                                                                                                                                                                                                                                                                                                                                                                                                                                                                                                                                                                                                                                                                                                                                                                                                                                                                                                                                                                                                                                                                                                                                                                                                                                                                                                                                                                                                                                                                                                                                                                            | Saitama Prefectural Institute of Public Health                            | Pathogen Genomics Center, National Institute of Infectious Diseases           | Tsuyoshi Sekizuka, Kentaro Itokawa, Rina Tanaka, Masanori Hashino, Makoto Kuroda                                                                                                                                                                                                                                                                                                                                                     |
| EPI_ISL_1426653, EPI_ISL_1426654, EPI_ISL_1426655, EPI_ISL_1426656, EPI_ISL_1426657, EPI_ISL_1426658                                                                                                                                                                                                                                                                                                                                                                                                                                                                                                                                                                                                                                                                                                                                                                                                                                                                                                                                                                                                                                                                                                                                                                                                                                                                                                                                                                                                                                                                                                                                                                                                                                                                                                                                                                                                                                         | Chiba Prefectural Institute of Public Health                              | Pathogen Genomics Center, National Institute of Infectious Diseases           | Tsuyoshi Sekizuka, Kentaro Itokawa, Rina Tanaka, Masanori Hashino, Makoto Kuroda                                                                                                                                                                                                                                                                                                                                                     |
| EPI_ISL_1426659, EPI_ISL_1426660                                                                                                                                                                                                                                                                                                                                                                                                                                                                                                                                                                                                                                                                                                                                                                                                                                                                                                                                                                                                                                                                                                                                                                                                                                                                                                                                                                                                                                                                                                                                                                                                                                                                                                                                                                                                                                                                                                             | Pathogen Genomics Center, National Institute of Infectious Diseases       | Pathogen Genomics Center, National Institute of Infectious Diseases           | Tsuyoshi Sekizuka, Kentaro Itokawa, Rina Tanaka, Masanori Hashino, Makoto Kuroda                                                                                                                                                                                                                                                                                                                                                     |
| EPI_ISL_1427689, EPI_ISL_1427690, EPI_ISL_1427691, EPI_ISL_1427692                                                                                                                                                                                                                                                                                                                                                                                                                                                                                                                                                                                                                                                                                                                                                                                                                                                                                                                                                                                                                                                                                                                                                                                                                                                                                                                                                                                                                                                                                                                                                                                                                                                                                                                                                                                                                                                                           | Gunma Prefectural Institute of Public Health and Environmental Sciences   | Pathogen Genomics Center, National Institute of Infectious Diseases           | Tsuyoshi Sekizuka, Kentaro Itokawa, Rina Tanaka, Masanori Hashino, Makoto Kuroda                                                                                                                                                                                                                                                                                                                                                     |
| EPI_ISL_1427693                                                                                                                                                                                                                                                                                                                                                                                                                                                                                                                                                                                                                                                                                                                                                                                                                                                                                                                                                                                                                                                                                                                                                                                                                                                                                                                                                                                                                                                                                                                                                                                                                                                                                                                                                                                                                                                                                                                              | SARS-CoV-2 testing team, National Institute of Infectious Diseases        | Pathogen Genomics Center, National Institute of Infectious Diseases           | Tsuyoshi Sekizuka, Kentaro Itokawa, Rina Tanaka, Masanori Hashino, Daisuke Kobayashi, Kento Fukano, Yasuyuki Morishima, Takanobu Kato, , Makoto Kuroda                                                                                                                                                                                                                                                                               |
| EPI_ISL_1427694, EPI_ISL_1427695, EPI_ISL_1427696, EPI_ISL_1427697, EPI_ISL_1427698, EPI_ISL_1427699, EPI_ISL_1427700, EPI_ISL_1427701, EPI_ISL_1427702, EPI_ISL_1427703, EPI_ISL_1427704, EPI_ISL_1427705, EPI_ISL_1427706, EPI_ISL_1427707, EPI_ISL_1427708, EPI_ISL_1427709, EPI_ISL_1427710, EPI_ISL_1427711, EPI_ISL_1427712, EPI_ISL_1427713, EPI_ISL_1427714                                                                                                                                                                                                                                                                                                                                                                                                                                                                                                                                                                                                                                                                                                                                                                                                                                                                                                                                                                                                                                                                                                                                                                                                                                                                                                                                                                                                                                                                                                                                                                          | Pathogen Genomics Center, National Institute of Infectious Diseases       | Pathogen Genomics Center, National Institute of Infectious Diseases           | Tsuyoshi Sekizuka, Kentaro Itokawa, Rina Tanaka, Masanori Hashino, Makoto Kuroda                                                                                                                                                                                                                                                                                                                                                     |
| see above                                                                                                                                                                                                                                                                                                                                                                                                                                                                                                                                                                                                                                                                                                                                                                                                                                                                                                                                                                                                                                                                                                                                                                                                                                                                                                                                                                                                                                                                                                                                                                                                                                                                                                                                                                                                                                                                                                                                    | Pathogen Genomics Center, National Institute of Infectious Diseases       | Pathogen Genomics Center, National Institute of Infectious Diseases           | Tsuyoshi Sekizuka, Kentaro Itokawa, Rina Tanaka, Masanori Hashino, Makoto Kuroda                                                                                                                                                                                                                                                                                                                                                     |
| EPI_ISL_1427716                                                                                                                                                                                                                                                                                                                                                                                                                                                                                                                                                                                                                                                                                                                                                                                                                                                                                                                                                                                                                                                                                                                                                                                                                                                                                                                                                                                                                                                                                                                                                                                                                                                                                                                                                                                                                                                                                                                              | Sakai City Institute of Public Health                                     | Pathogen Genomics Center, National Institute of Infectious Diseases           | Tsuyoshi Sekizuka, Kentaro Itokawa, Rina Tanaka, Masanori Hashino, Makoto Kuroda                                                                                                                                                                                                                                                                                                                                                     |
| EPI_ISL_1427717, EPI_ISL_1427718                                                                                                                                                                                                                                                                                                                                                                                                                                                                                                                                                                                                                                                                                                                                                                                                                                                                                                                                                                                                                                                                                                                                                                                                                                                                                                                                                                                                                                                                                                                                                                                                                                                                                                                                                                                                                                                                                                             | Chiba Prefectural Institute of Public Health                              | Pathogen Genomics Center, National Institute of Infectious Diseases           | Tsuyoshi Sekizuka, Kentaro Itokawa, Rina Tanaka, Masanori Hashino, Makoto Kuroda                                                                                                                                                                                                                                                                                                                                                     |
| EPI_ISL_1428665, EPI_ISL_1428694, EPI_ISL_1428695, EPI_ISL_1428696, EPI_ISL_1428697, EPI_ISL_1428698, EPI_ISL_1428699, EPI_ISL_1428700, EPI_ISL_1428701, EPI_ISL_1428702, EPI_ISL_1428703, EPI_ISL_1428704, EPI_ISL_1428705, EPI_ISL_1428706, EPI_ISL_1428707, EPI_ISL_1428708, EPI_ISL_1428709, EPI_ISL_1428710, EPI_ISL_1428711, EPI_ISL_1428712, EPI_ISL_1428713, EPI_ISL_1428714, EPI_ISL_1428715, EPI_ISL_1428716, EPI_ISL_1428717, EPI_ISL_1428718, EPI_ISL_1428719, EPI_ISL_1428720, EPI_ISL_1428721, EPI_ISL_1428722, EPI_ISL_1428723, EPI_ISL_1428724, EPI_ISL_1428725, EPI_ISL_1428726, EPI_ISL_1428727, EPI_ISL_1428728, EPI_ISL_1428729, EPI_ISL_1428730, EPI_ISL_1428731, EPI_ISL_1428732, EPI_ISL_1428733, EPI_ISL_1428734, EPI_ISL_1428735, EPI_ISL_1428736, EPI_ISL_1428737, EPI_ISL_1428738, EPI_ISL_1428739, EPI_ISL_1428740, EPI_ISL_1428741, EPI_ISL_1428742, EPI_ISL_1428743, EPI_ISL_1428744, EPI_ISL_1428745, EPI_ISL_1428746, EPI_ISL_1428747, EPI_ISL_1428748, EPI_ISL_1428749, EPI_ISL_1428750, EPI_ISL_1428751, EPI_ISL_1428752, EPI_ISL_1428753, EPI_ISL_1428754, EPI_ISL_1428755, EPI_ISL_1428756, EPI_ISL_1428757, EPI_ISL_1428758, EPI_ISL_1428759, EPI_ISL_1428760, EPI_ISL_1428761, EPI_ISL_1428762, EPI_ISL_1428763, EPI_ISL_1428764, EPI_ISL_1428765, EPI_ISL_1428766, EPI_ISL_1428767, EPI_ISL_1428768, EPI_ISL_1428769, EPI_ISL_1428770, EPI_ISL_1428771, EPI_ISL_1428772, EPI_ISL_1428773, EPI_ISL_1428774, EPI_ISL_1428775, EPI_ISL_1428776, EPI_ISL_1428777, EPI_ISL_1428778, EPI_ISL_1428779, EPI_ISL_1428780, EPI_ISL_1428781, EPI_ISL_1428782, EPI_ISL_1428783, EPI_ISL_1428784, EPI_ISL_1428785, EPI_ISL_1428786, EPI_ISL_1428787, EPI_ISL_1428788, EPI_ISL_1428789, EPI_ISL_1428790, EPI_ISL_1428791, EPI_ISL_1428792, EPI_ISL_1428793, EPI_ISL_1428794, EPI_ISL_1428795, EPI_ISL_1428796, EPI_ISL_1428797, EPI_ISL_1428798, EPI_ISL_1428799, EPI_ISL_1429635, EPI_ISL_1429637, EPI_ISL_1429638 | Pathogen Genomics Center, National Institute of Infectious Diseases       | Pathogen Genomics Center, National Institute of Infectious Diseases           | Tsuyoshi Sekizuka, Kentaro Itokawa, Rina Tanaka, Masanori Hashino, Makoto Kuroda                                                                                                                                                                                                                                                                                                                                                     |
| see above                                                                                                                                                                                                                                                                                                                                                                                                                                                                                                                                                                                                                                                                                                                                                                                                                                                                                                                                                                                                                                                                                                                                                                                                                                                                                                                                                                                                                                                                                                                                                                                                                                                                                                                                                                                                                                                                                                                                    | Pathogen Genomics Center, National Institute of Infectious Diseases       | Pathogen Genomics Center, National Institute of Infectious Diseases           | Tsuyoshi Sekizuka, Kentaro Itokawa, Rina Tanaka, Masanori Hashino, Makoto Kuroda                                                                                                                                                                                                                                                                                                                                                     |
| EPI_ISL_1429639                                                                                                                                                                                                                                                                                                                                                                                                                                                                                                                                                                                                                                                                                                                                                                                                                                                                                                                                                                                                                                                                                                                                                                                                                                                                                                                                                                                                                                                                                                                                                                                                                                                                                                                                                                                                                                                                                                                              | Toyama Institute of Health                                                | Pathogen Genomics Center, National Institute of Infectious Diseases           | Tsuyoshi Sekizuka, Kentaro Itokawa, Rina Tanaka, Masanori Hashino, Makoto Kuroda                                                                                                                                                                                                                                                                                                                                                     |
| EPI_ISL_1430685                                                                                                                                                                                                                                                                                                                                                                                                                                                                                                                                                                                                                                                                                                                                                                                                                                                                                                                                                                                                                                                                                                                                                                                                                                                                                                                                                                                                                                                                                                                                                                                                                                                                                                                                                                                                                                                                                                                              | Niigata Prefectural Institute of Public Health and Environmental Sciences | Pathogen Genomics Center, National Institute of Infectious Diseases           | Tsuyoshi Sekizuka, Kentaro Itokawa, Rina Tanaka, Masanori Hashino, Makoto Kuroda                                                                                                                                                                                                                                                                                                                                                     |
| EPI_ISL_1430702, EPI_ISL_1430703, EPI_ISL_1430704, EPI_ISL_1430735, EPI_ISL_1430741, EPI_ISL_1430742, EPI_ISL_1430743, EPI_ISL_1430744, EPI_ISL_1430745, EPI_ISL_1430746, EPI_ISL_1430747, EPI_ISL_1430748                                                                                                                                                                                                                                                                                                                                                                                                                                                                                                                                                                                                                                                                                                                                                                                                                                                                                                                                                                                                                                                                                                                                                                                                                                                                                                                                                                                                                                                                                                                                                                                                                                                                                                                                   |                                                                           |                                                                               |                                                                                                                                                                                                                                                                                                                                                                                                                                      |





|                                                                                                                                                                                                                                                                                                                                                                                                                                                                                                                                                                                                                                                                                                                                                                                                                                                                                                                                                                                                                                                                                                                                                                                                                                                                                                                                                                                                                                                                                                                                                                                                                                                                                                                                                                                                                                                                                                                                                                                                                                                                                                                                                                                                                                                                                                                                                                                                                                                                                                                                                                                                                                                                                                                                                                                                                                                                                                                                                                                                                                                                                                                |                 |                                                                                             |                                                                                             |                                                                                                                                                                                                                                                                 |
|----------------------------------------------------------------------------------------------------------------------------------------------------------------------------------------------------------------------------------------------------------------------------------------------------------------------------------------------------------------------------------------------------------------------------------------------------------------------------------------------------------------------------------------------------------------------------------------------------------------------------------------------------------------------------------------------------------------------------------------------------------------------------------------------------------------------------------------------------------------------------------------------------------------------------------------------------------------------------------------------------------------------------------------------------------------------------------------------------------------------------------------------------------------------------------------------------------------------------------------------------------------------------------------------------------------------------------------------------------------------------------------------------------------------------------------------------------------------------------------------------------------------------------------------------------------------------------------------------------------------------------------------------------------------------------------------------------------------------------------------------------------------------------------------------------------------------------------------------------------------------------------------------------------------------------------------------------------------------------------------------------------------------------------------------------------------------------------------------------------------------------------------------------------------------------------------------------------------------------------------------------------------------------------------------------------------------------------------------------------------------------------------------------------------------------------------------------------------------------------------------------------------------------------------------------------------------------------------------------------------------------------------------------------------------------------------------------------------------------------------------------------------------------------------------------------------------------------------------------------------------------------------------------------------------------------------------------------------------------------------------------------------------------------------------------------------------------------------------------------|-----------------|---------------------------------------------------------------------------------------------|---------------------------------------------------------------------------------------------|-----------------------------------------------------------------------------------------------------------------------------------------------------------------------------------------------------------------------------------------------------------------|
| EPI_ISL_1431749, EPI_ISL_1431750, EPI_ISL_1431751, EPI_ISL_1431752, EPI_ISL_1431753, EPI_ISL_1431754, EPI_ISL_1431755, EPI_ISL_1431756, EPI_ISL_1431757, EPI_ISL_1431758, EPI_ISL_1431759, EPI_ISL_1431760, EPI_ISL_1431761, EPI_ISL_1431762, EPI_ISL_1431763, EPI_ISL_1431764                                                                                                                                                                                                                                                                                                                                                                                                                                                                                                                                                                                                                                                                                                                                                                                                                                                                                                                                                                                                                                                                                                                                                                                                                                                                                                                                                                                                                                                                                                                                                                                                                                                                                                                                                                                                                                                                                                                                                                                                                                                                                                                                                                                                                                                                                                                                                                                                                                                                                                                                                                                                                                                                                                                                                                                                                                 | see above       | Chiba Prefectural Institute of Public Health                                                | Pathogen Genomics Center, National Institute of Infectious Diseases                         | Tsuyoshi Sekizuka, Kentaro Itokawa, Rina Tanaka, Masanori Hashino, Makoto Kuroda                                                                                                                                                                                |
| EPI_ISL_1431765, EPI_ISL_1431766, EPI_ISL_1431767, EPI_ISL_1431768, EPI_ISL_1431769, EPI_ISL_1431770, EPI_ISL_1431771, EPI_ISL_1431772, EPI_ISL_1431773, EPI_ISL_1431774, EPI_ISL_1431775, EPI_ISL_1431776, EPI_ISL_1431777, EPI_ISL_1431778, EPI_ISL_1431779, EPI_ISL_1431780, EPI_ISL_1431781, EPI_ISL_1431782, EPI_ISL_1431783, EPI_ISL_1431784, EPI_ISL_1431785, EPI_ISL_1431786, EPI_ISL_1431787, EPI_ISL_1431788, EPI_ISL_1431789, EPI_ISL_1431790, EPI_ISL_1431791, EPI_ISL_1431792, EPI_ISL_1431793, EPI_ISL_1431794, EPI_ISL_1431795, EPI_ISL_1431796, EPI_ISL_1431797, EPI_ISL_1431798, EPI_ISL_1431799, EPI_ISL_1431800, EPI_ISL_1431801                                                                                                                                                                                                                                                                                                                                                                                                                                                                                                                                                                                                                                                                                                                                                                                                                                                                                                                                                                                                                                                                                                                                                                                                                                                                                                                                                                                                                                                                                                                                                                                                                                                                                                                                                                                                                                                                                                                                                                                                                                                                                                                                                                                                                                                                                                                                                                                                                                                            | see above       | Pathogen Genomics Center, National Institute of Infectious Diseases                         | Pathogen Genomics Center, National Institute of Infectious Diseases                         | Tsuyoshi Sekizuka, Kentaro Itokawa, Rina Tanaka, Masanori Hashino, Makoto Kuroda                                                                                                                                                                                |
| EPI_ISL_1431802, EPI_ISL_1431803, EPI_ISL_1431804                                                                                                                                                                                                                                                                                                                                                                                                                                                                                                                                                                                                                                                                                                                                                                                                                                                                                                                                                                                                                                                                                                                                                                                                                                                                                                                                                                                                                                                                                                                                                                                                                                                                                                                                                                                                                                                                                                                                                                                                                                                                                                                                                                                                                                                                                                                                                                                                                                                                                                                                                                                                                                                                                                                                                                                                                                                                                                                                                                                                                                                              | EPI_ISL_1431805 | Gunma Prefectural Institute of Public Health and Environmental Sciences                     | Pathogen Genomics Center, National Institute of Infectious Diseases                         | Tsuyoshi Sekizuka, Kentaro Itokawa, Rina Tanaka, Masanori Hashino, Makoto Kuroda                                                                                                                                                                                |
| EPI_ISL_1431805                                                                                                                                                                                                                                                                                                                                                                                                                                                                                                                                                                                                                                                                                                                                                                                                                                                                                                                                                                                                                                                                                                                                                                                                                                                                                                                                                                                                                                                                                                                                                                                                                                                                                                                                                                                                                                                                                                                                                                                                                                                                                                                                                                                                                                                                                                                                                                                                                                                                                                                                                                                                                                                                                                                                                                                                                                                                                                                                                                                                                                                                                                |                 | Toyama Institute of Health                                                                  | Pathogen Genomics Center, National Institute of Infectious Diseases                         | Tsuyoshi Sekizuka, Kentaro Itokawa, Rina Tanaka, Masanori Hashino, Makoto Kuroda                                                                                                                                                                                |
| EPI_ISL_1431806, EPI_ISL_1431807, EPI_ISL_1431808, EPI_ISL_1431809, EPI_ISL_1431810, EPI_ISL_1431811, EPI_ISL_1431812, EPI_ISL_1431813, EPI_ISL_1431814, EPI_ISL_1431815, EPI_ISL_1431816, EPI_ISL_1431817, EPI_ISL_1431818, EPI_ISL_1431819, EPI_ISL_1431820, EPI_ISL_1431821, EPI_ISL_1431822, EPI_ISL_1431823                                                                                                                                                                                                                                                                                                                                                                                                                                                                                                                                                                                                                                                                                                                                                                                                                                                                                                                                                                                                                                                                                                                                                                                                                                                                                                                                                                                                                                                                                                                                                                                                                                                                                                                                                                                                                                                                                                                                                                                                                                                                                                                                                                                                                                                                                                                                                                                                                                                                                                                                                                                                                                                                                                                                                                                               | see above       | Pathogen Genomics Center, National Institute of Infectious Diseases                         | Pathogen Genomics Center, National Institute of Infectious Diseases                         | Tsuyoshi Sekizuka, Kentaro Itokawa, Rina Tanaka, Masanori Hashino, Makoto Kuroda                                                                                                                                                                                |
| EPI_ISL_1431824, EPI_ISL_1431825, EPI_ISL_1431826, EPI_ISL_1431827, EPI_ISL_1431828                                                                                                                                                                                                                                                                                                                                                                                                                                                                                                                                                                                                                                                                                                                                                                                                                                                                                                                                                                                                                                                                                                                                                                                                                                                                                                                                                                                                                                                                                                                                                                                                                                                                                                                                                                                                                                                                                                                                                                                                                                                                                                                                                                                                                                                                                                                                                                                                                                                                                                                                                                                                                                                                                                                                                                                                                                                                                                                                                                                                                            |                 | Chiba Prefectural Institute of Public Health                                                | Pathogen Genomics Center, National Institute of Infectious Diseases                         | Tsuyoshi Sekizuka, Kentaro Itokawa, Rina Tanaka, Masanori Hashino, Makoto Kuroda                                                                                                                                                                                |
| EPI_ISL_1431829, EPI_ISL_1431830, EPI_ISL_1431831, EPI_ISL_1431832, EPI_ISL_1431833, EPI_ISL_1431834, EPI_ISL_1431835, EPI_ISL_1431836, EPI_ISL_1431837, EPI_ISL_1431838, EPI_ISL_1431839, EPI_ISL_1431840, EPI_ISL_1431841, EPI_ISL_1431842, EPI_ISL_1431843, EPI_ISL_1431844, EPI_ISL_1431845, EPI_ISL_1431846, EPI_ISL_1431847, EPI_ISL_1431848, EPI_ISL_1431849, EPI_ISL_1431850, EPI_ISL_1431851, EPI_ISL_1431852, EPI_ISL_1431853, EPI_ISL_1431854, EPI_ISL_1431855, EPI_ISL_1431856, EPI_ISL_1431857, EPI_ISL_1431858, EPI_ISL_1431859, EPI_ISL_1431860, EPI_ISL_1431861, EPI_ISL_1431862, EPI_ISL_1431863, EPI_ISL_1431864, EPI_ISL_1431865, EPI_ISL_1431866, EPI_ISL_1431867, EPI_ISL_1431868, EPI_ISL_1431869, EPI_ISL_1431870, EPI_ISL_1431871, EPI_ISL_1431872, EPI_ISL_1431873, EPI_ISL_1431874, EPI_ISL_1431875, EPI_ISL_1431876, EPI_ISL_1431877, EPI_ISL_1431878, EPI_ISL_1431879, EPI_ISL_1431880, EPI_ISL_1431881, EPI_ISL_1431882, EPI_ISL_1431883, EPI_ISL_1431884, EPI_ISL_1431885, EPI_ISL_1431886, EPI_ISL_1431887, EPI_ISL_1431888, EPI_ISL_1431889, EPI_ISL_1431890, EPI_ISL_1431891, EPI_ISL_1431892, EPI_ISL_1431893, EPI_ISL_1431894, EPI_ISL_1431895, EPI_ISL_1431896, EPI_ISL_1431897, EPI_ISL_1431898, EPI_ISL_1431899, EPI_ISL_1431900, EPI_ISL_1431901, EPI_ISL_1431902, EPI_ISL_1431903, EPI_ISL_1431904, EPI_ISL_1431905, EPI_ISL_1431906, EPI_ISL_1431907, EPI_ISL_1431908, EPI_ISL_1431909, EPI_ISL_1431910, EPI_ISL_1431911, EPI_ISL_1431912, EPI_ISL_1431913, EPI_ISL_1431914, EPI_ISL_1431915, EPI_ISL_1431916, EPI_ISL_1431917, EPI_ISL_1431918, EPI_ISL_1431919, EPI_ISL_1431920, EPI_ISL_1431921, EPI_ISL_1431922, EPI_ISL_1431923, EPI_ISL_1431924, EPI_ISL_1431925, EPI_ISL_1431926, EPI_ISL_1431927, EPI_ISL_1431928, EPI_ISL_1431929, EPI_ISL_1431930, EPI_ISL_1431931, EPI_ISL_1431932, EPI_ISL_1431933, EPI_ISL_1431934, EPI_ISL_1431935, EPI_ISL_1431936, EPI_ISL_1431937, EPI_ISL_1431938, EPI_ISL_1431939, EPI_ISL_1431940, EPI_ISL_1431941, EPI_ISL_1431942, EPI_ISL_1431943, EPI_ISL_1431944, EPI_ISL_1431945, EPI_ISL_1431946, EPI_ISL_1431947, EPI_ISL_1431948, EPI_ISL_1431949, EPI_ISL_1431950, EPI_ISL_1431951, EPI_ISL_1431952, EPI_ISL_1431953, EPI_ISL_1431954, EPI_ISL_1431955, EPI_ISL_1431956, EPI_ISL_1431957, EPI_ISL_1431958, EPI_ISL_1431959, EPI_ISL_1431960, EPI_ISL_1431961, EPI_ISL_1431962, EPI_ISL_1431963, EPI_ISL_1431964, EPI_ISL_1431965, EPI_ISL_1431966, EPI_ISL_1431967, EPI_ISL_1431968, EPI_ISL_1431969, EPI_ISL_1431970, EPI_ISL_1431971, EPI_ISL_1431972, EPI_ISL_1431973, EPI_ISL_1431974, EPI_ISL_1431975, EPI_ISL_1431976, EPI_ISL_1431977, EPI_ISL_1431978, EPI_ISL_1431979, EPI_ISL_1431980, EPI_ISL_1431981, EPI_ISL_1431982, EPI_ISL_1431983, EPI_ISL_1431984, EPI_ISL_1431985, EPI_ISL_1431986, EPI_ISL_1431987, EPI_ISL_1431988, EPI_ISL_1431989, EPI_ISL_1431990, EPI_ISL_1431991, EPI_ISL_1431992, EPI_ISL_1431993, EPI_ISL_1431994, EPI_ISL_1431995, EPI_ISL_1431996, EPI_ISL_1431997, EPI_ISL_1431998, EPI_ISL_1431999, EPI_ISL_1432000, EPI_ISL_1432001, EPI_ISL_1432002, EPI_ISL_1432003, EPI_ISL_1432004 | see above       | Pathogen Genomics Center, National Institute of Infectious Diseases                         | Pathogen Genomics Center, National Institute of Infectious Diseases                         | Tsuyoshi Sekizuka, Kentaro Itokawa, Rina Tanaka, Masanori Hashino, Makoto Kuroda                                                                                                                                                                                |
| EPI_ISL_1432005                                                                                                                                                                                                                                                                                                                                                                                                                                                                                                                                                                                                                                                                                                                                                                                                                                                                                                                                                                                                                                                                                                                                                                                                                                                                                                                                                                                                                                                                                                                                                                                                                                                                                                                                                                                                                                                                                                                                                                                                                                                                                                                                                                                                                                                                                                                                                                                                                                                                                                                                                                                                                                                                                                                                                                                                                                                                                                                                                                                                                                                                                                |                 | Toyama Institute of Health                                                                  | Pathogen Genomics Center, National Institute of Infectious Diseases                         | Tsuyoshi Sekizuka, Kentaro Itokawa, Rina Tanaka, Masanori Hashino, Makoto Kuroda                                                                                                                                                                                |
| EPI_ISL_1432006, EPI_ISL_1433318, EPI_ISL_1433320, EPI_ISL_1433322, EPI_ISL_1433324, EPI_ISL_1433326, EPI_ISL_1433328, EPI_ISL_1433330, EPI_ISL_1433331, EPI_ISL_1433333, EPI_ISL_1433335, EPI_ISL_1433337, EPI_ISL_1433339, EPI_ISL_1433341, EPI_ISL_1433343, EPI_ISL_1433345, EPI_ISL_1433348, EPI_ISL_1433350, EPI_ISL_1433352, EPI_ISL_1433353, EPI_ISL_1433355, EPI_ISL_1433357, EPI_ISL_1433359, EPI_ISL_1433361, EPI_ISL_1433363, EPI_ISL_1433365, EPI_ISL_1433367, EPI_ISL_1433369, EPI_ISL_1433371, EPI_ISL_1433373                                                                                                                                                                                                                                                                                                                                                                                                                                                                                                                                                                                                                                                                                                                                                                                                                                                                                                                                                                                                                                                                                                                                                                                                                                                                                                                                                                                                                                                                                                                                                                                                                                                                                                                                                                                                                                                                                                                                                                                                                                                                                                                                                                                                                                                                                                                                                                                                                                                                                                                                                                                   | see above       | Pathogen Genomics Center, National Institute of Infectious Diseases                         | Pathogen Genomics Center, National Institute of Infectious Diseases                         | Tsuyoshi Sekizuka, Kentaro Itokawa, Rina Tanaka, Masanori Hashino, Makoto Kuroda                                                                                                                                                                                |
| EPI_ISL_1433375, EPI_ISL_1433377, EPI_ISL_1433379, EPI_ISL_1433381, EPI_ISL_1433383, EPI_ISL_1433385, EPI_ISL_1433387, EPI_ISL_1433389                                                                                                                                                                                                                                                                                                                                                                                                                                                                                                                                                                                                                                                                                                                                                                                                                                                                                                                                                                                                                                                                                                                                                                                                                                                                                                                                                                                                                                                                                                                                                                                                                                                                                                                                                                                                                                                                                                                                                                                                                                                                                                                                                                                                                                                                                                                                                                                                                                                                                                                                                                                                                                                                                                                                                                                                                                                                                                                                                                         |                 | Ibaraki Prefectural Institute of Public Health                                              | Pathogen Genomics Center, National Institute of Infectious Diseases                         | Tsuyoshi Sekizuka, Kentaro Itokawa, Rina Tanaka, Masanori Hashino, Makoto Kuroda                                                                                                                                                                                |
| EPI_ISL_1433764, EPI_ISL_1434074, EPI_ISL_1434130, EPI_ISL_1434325                                                                                                                                                                                                                                                                                                                                                                                                                                                                                                                                                                                                                                                                                                                                                                                                                                                                                                                                                                                                                                                                                                                                                                                                                                                                                                                                                                                                                                                                                                                                                                                                                                                                                                                                                                                                                                                                                                                                                                                                                                                                                                                                                                                                                                                                                                                                                                                                                                                                                                                                                                                                                                                                                                                                                                                                                                                                                                                                                                                                                                             |                 | Labor Dr. Wisplinghoff - Köln                                                               | Robert Koch Institute                                                                       | unknown                                                                                                                                                                                                                                                         |
| EPI_ISL_1434432, EPI_ISL_1434434, EPI_ISL_1434436, EPI_ISL_1434438, EPI_ISL_1434440, EPI_ISL_1434442, EPI_ISL_1434444, EPI_ISL_1434446, EPI_ISL_1434448, EPI_ISL_1434450, EPI_ISL_1434452, EPI_ISL_1434454, EPI_ISL_1434456, EPI_ISL_1434458, EPI_ISL_1434460, EPI_ISL_1434462, EPI_ISL_1434464, EPI_ISL_1434466, EPI_ISL_1434468, EPI_ISL_1434470, EPI_ISL_1434472, EPI_ISL_1434474, EPI_ISL_1434476, EPI_ISL_1434478, EPI_ISL_1434480, EPI_ISL_1434482, EPI_ISL_1434484, EPI_ISL_1434486, EPI_ISL_1434488, EPI_ISL_1434490, EPI_ISL_1434492, EPI_ISL_1434494, EPI_ISL_1434496, EPI_ISL_1434498, EPI_ISL_1434500, EPI_ISL_1434502, EPI_ISL_1434504, EPI_ISL_1434506, EPI_ISL_1434508, EPI_ISL_1434510, EPI_ISL_1434512, EPI_ISL_1434514, EPI_ISL_1434516, EPI_ISL_1434518, EPI_ISL_1434520, EPI_ISL_1434522, EPI_ISL_1434524, EPI_ISL_1434526, EPI_ISL_1434528, EPI_ISL_1434530, EPI_ISL_1434532, EPI_ISL_1434534, EPI_ISL_1434536, EPI_ISL_1434538, EPI_ISL_1434540, EPI_ISL_1434542, EPI_ISL_1434544, EPI_ISL_1434546, EPI_ISL_1434548, EPI_ISL_1434550, EPI_ISL_1434552, EPI_ISL_1434554, EPI_ISL_1434556, EPI_ISL_1434558, EPI_ISL_1434560, EPI_ISL_1434562, EPI_ISL_1434564, EPI_ISL_1434566, EPI_ISL_1434568, EPI_ISL_1434570, EPI_ISL_1434572, EPI_ISL_1434574, EPI_ISL_1434576, EPI_ISL_1434578, EPI_ISL_1434580, EPI_ISL_1434582, EPI_ISL_1434584, EPI_ISL_1434586, EPI_ISL_1434588, EPI_ISL_1434590, EPI_ISL_1434592, EPI_ISL_1434594, EPI_ISL_1434596, EPI_ISL_1434598, EPI_ISL_1434600                                                                                                                                                                                                                                                                                                                                                                                                                                                                                                                                                                                                                                                                                                                                                                                                                                                                                                                                                                                                                                                                                                                                                                                                                                                                                                                                                                                                                                                                                                                                                                                                            | see above       | Ibaraki Prefectural Institute of Public Health                                              | Ibaraki Prefectural Institute of Public Health                                              | Keiko Goto, Tsuyoshi Sekizuka, Kentaro Itokawa, Rina Tanaka, Masanori Hashino, Makoto Kuroda                                                                                                                                                                    |
| EPI_ISL_1435375                                                                                                                                                                                                                                                                                                                                                                                                                                                                                                                                                                                                                                                                                                                                                                                                                                                                                                                                                                                                                                                                                                                                                                                                                                                                                                                                                                                                                                                                                                                                                                                                                                                                                                                                                                                                                                                                                                                                                                                                                                                                                                                                                                                                                                                                                                                                                                                                                                                                                                                                                                                                                                                                                                                                                                                                                                                                                                                                                                                                                                                                                                |                 | MVZ Dr. Eberhard & Partner Dortmund                                                         | Robert Koch Institute                                                                       | unknown                                                                                                                                                                                                                                                         |
| EPI_ISL_1437816, EPI_ISL_1440277, EPI_ISL_1440317, EPI_ISL_1440341, EPI_ISL_1440363, EPI_ISL_1440417, EPI_ISL_1440424, EPI_ISL_1440427, EPI_ISL_1440428, EPI_ISL_1440434, EPI_ISL_1440436, EPI_ISL_1440468, EPI_ISL_1440469, EPI_ISL_1440483, EPI_ISL_1440556, EPI_ISL_1442604, EPI_ISL_1442609, EPI_ISL_1442613, EPI_ISL_1442633, EPI_ISL_1442711, EPI_ISL_1442732, EPI_ISL_1442744                                                                                                                                                                                                                                                                                                                                                                                                                                                                                                                                                                                                                                                                                                                                                                                                                                                                                                                                                                                                                                                                                                                                                                                                                                                                                                                                                                                                                                                                                                                                                                                                                                                                                                                                                                                                                                                                                                                                                                                                                                                                                                                                                                                                                                                                                                                                                                                                                                                                                                                                                                                                                                                                                                                           | see above       | SYNLAB MVZ Weiden                                                                           | Robert Koch Institute                                                                       | unknown                                                                                                                                                                                                                                                         |
| EPI_ISL_1442956, EPI_ISL_1442957, EPI_ISL_1442958, EPI_ISL_1442959, EPI_ISL_1442960, EPI_ISL_1442961, EPI_ISL_1442962, EPI_ISL_1442963                                                                                                                                                                                                                                                                                                                                                                                                                                                                                                                                                                                                                                                                                                                                                                                                                                                                                                                                                                                                                                                                                                                                                                                                                                                                                                                                                                                                                                                                                                                                                                                                                                                                                                                                                                                                                                                                                                                                                                                                                                                                                                                                                                                                                                                                                                                                                                                                                                                                                                                                                                                                                                                                                                                                                                                                                                                                                                                                                                         |                 | Gunma Prefectural Institute of Public Health and Environmental Sciences                     | Gunma Prefectural Institute of Public Health and Environmental Sciences                     | Tsuyoshi Sekizuka, Kentaro Itokawa, Rina Tanaka, Masanori Hashino, Makoto Kuroda, Hiroyuki Tsukagoshi, Daisuke Shinoda, Mariko Saito                                                                                                                            |
| EPI_ISL_1443315                                                                                                                                                                                                                                                                                                                                                                                                                                                                                                                                                                                                                                                                                                                                                                                                                                                                                                                                                                                                                                                                                                                                                                                                                                                                                                                                                                                                                                                                                                                                                                                                                                                                                                                                                                                                                                                                                                                                                                                                                                                                                                                                                                                                                                                                                                                                                                                                                                                                                                                                                                                                                                                                                                                                                                                                                                                                                                                                                                                                                                                                                                |                 | Clinical Molecular Microbiology Laboratory, UNC Hospital                                    | Dirk Dittmer                                                                                | Justin T. Landis , Razia Moorad , Brent A. Eason, Melissa B. Miller, Linda Pluta, Dirk Dittmer, Angelica Juarez, Cecilia Thompson, Shawn Hawken, Cameron Grant, Evelyn Hoffman, Patricia Cano, Jason Wong, Carolina Caro-Vegas, Ryan McNamara, Blossom Damania. |
| EPI_ISL_1443429                                                                                                                                                                                                                                                                                                                                                                                                                                                                                                                                                                                                                                                                                                                                                                                                                                                                                                                                                                                                                                                                                                                                                                                                                                                                                                                                                                                                                                                                                                                                                                                                                                                                                                                                                                                                                                                                                                                                                                                                                                                                                                                                                                                                                                                                                                                                                                                                                                                                                                                                                                                                                                                                                                                                                                                                                                                                                                                                                                                                                                                                                                |                 | Lab voor klinische biologie                                                                 | Lab voor klinische biologie                                                                 | Marija Janevska, Hannelore Hamerlinck, Bruno Verhassel                                                                                                                                                                                                          |
| EPI_ISL_1444820, EPI_ISL_1444822, EPI_ISL_1444826, EPI_ISL_1444827, EPI_ISL_1444828, EPI_ISL_1444850, EPI_ISL_1444856, EPI_ISL_1444859, EPI_ISL_1444867, EPI_ISL_1444901                                                                                                                                                                                                                                                                                                                                                                                                                                                                                                                                                                                                                                                                                                                                                                                                                                                                                                                                                                                                                                                                                                                                                                                                                                                                                                                                                                                                                                                                                                                                                                                                                                                                                                                                                                                                                                                                                                                                                                                                                                                                                                                                                                                                                                                                                                                                                                                                                                                                                                                                                                                                                                                                                                                                                                                                                                                                                                                                       |                 | Maryland Genomics, Institute for Genome Sciences, University of Maryland School of Medicine | Maryland Genomics, Institute for Genome Sciences, University of Maryland School of Medicine | Tallon, Luke J; Sadzewicz, Lisa D; Humphrys, Mike; Ott, Sandra; Roussey, Holly; Mehta, Aditya; Vavikolanu, Kranthi; Fraser, Claire M; Ravel, Jacques                                                                                                            |
| EPI_ISL_1446224                                                                                                                                                                                                                                                                                                                                                                                                                                                                                                                                                                                                                                                                                                                                                                                                                                                                                                                                                                                                                                                                                                                                                                                                                                                                                                                                                                                                                                                                                                                                                                                                                                                                                                                                                                                                                                                                                                                                                                                                                                                                                                                                                                                                                                                                                                                                                                                                                                                                                                                                                                                                                                                                                                                                                                                                                                                                                                                                                                                                                                                                                                |                 | Texas Children's Hospital                                                                   | Texas Children's Microbiome Center                                                          | Ruth Ann Luna, Jennifer K. Spinler, James Dunn, James Versalovic, Ila Singh                                                                                                                                                                                     |
| EPI_ISL_1447099                                                                                                                                                                                                                                                                                                                                                                                                                                                                                                                                                                                                                                                                                                                                                                                                                                                                                                                                                                                                                                                                                                                                                                                                                                                                                                                                                                                                                                                                                                                                                                                                                                                                                                                                                                                                                                                                                                                                                                                                                                                                                                                                                                                                                                                                                                                                                                                                                                                                                                                                                                                                                                                                                                                                                                                                                                                                                                                                                                                                                                                                                                |                 | DOHMH PHL                                                                                   | New York City Public Health Laboratory                                                      | Jade Wang, et al.                                                                                                                                                                                                                                               |
| EPI_ISL_1447112                                                                                                                                                                                                                                                                                                                                                                                                                                                                                                                                                                                                                                                                                                                                                                                                                                                                                                                                                                                                                                                                                                                                                                                                                                                                                                                                                                                                                                                                                                                                                                                                                                                                                                                                                                                                                                                                                                                                                                                                                                                                                                                                                                                                                                                                                                                                                                                                                                                                                                                                                                                                                                                                                                                                                                                                                                                                                                                                                                                                                                                                                                |                 | DOHMH Fort Greene                                                                           | New York City Public Health Laboratory                                                      | Jade Wang, et al.                                                                                                                                                                                                                                               |
| EPI_ISL_1447184                                                                                                                                                                                                                                                                                                                                                                                                                                                                                                                                                                                                                                                                                                                                                                                                                                                                                                                                                                                                                                                                                                                                                                                                                                                                                                                                                                                                                                                                                                                                                                                                                                                                                                                                                                                                                                                                                                                                                                                                                                                                                                                                                                                                                                                                                                                                                                                                                                                                                                                                                                                                                                                                                                                                                                                                                                                                                                                                                                                                                                                                                                |                 | DOHMH PHL                                                                                   | New York City Public Health Laboratory                                                      | Jade Wang, et al.                                                                                                                                                                                                                                               |
| EPI_ISL_1447185                                                                                                                                                                                                                                                                                                                                                                                                                                                                                                                                                                                                                                                                                                                                                                                                                                                                                                                                                                                                                                                                                                                                                                                                                                                                                                                                                                                                                                                                                                                                                                                                                                                                                                                                                                                                                                                                                                                                                                                                                                                                                                                                                                                                                                                                                                                                                                                                                                                                                                                                                                                                                                                                                                                                                                                                                                                                                                                                                                                                                                                                                                |                 | DOHMH Corona                                                                                | New York City Public Health Laboratory                                                      | Jade Wang, et al.                                                                                                                                                                                                                                               |
| EPI_ISL_1447186                                                                                                                                                                                                                                                                                                                                                                                                                                                                                                                                                                                                                                                                                                                                                                                                                                                                                                                                                                                                                                                                                                                                                                                                                                                                                                                                                                                                                                                                                                                                                                                                                                                                                                                                                                                                                                                                                                                                                                                                                                                                                                                                                                                                                                                                                                                                                                                                                                                                                                                                                                                                                                                                                                                                                                                                                                                                                                                                                                                                                                                                                                |                 | DOHMH Central Harlem                                                                        | New York City Public Health Laboratory                                                      | Jade Wang, et al.                                                                                                                                                                                                                                               |
| EPI_ISL_1447627, EPI_ISL_1447647, EPI_ISL_1447660, EPI_ISL_1447669,                                                                                                                                                                                                                                                                                                                                                                                                                                                                                                                                                                                                                                                                                                                                                                                                                                                                                                                                                                                                                                                                                                                                                                                                                                                                                                                                                                                                                                                                                                                                                                                                                                                                                                                                                                                                                                                                                                                                                                                                                                                                                                                                                                                                                                                                                                                                                                                                                                                                                                                                                                                                                                                                                                                                                                                                                                                                                                                                                                                                                                            |                 | Yale Clinical Virology Lab                                                                  | Grubaugh Lab - Yale School of Public Health                                                 | Joseph Fauver, Mallery Breban, Isabel Ott, Tara Alpert, Mary Petrone, Anderson Brito, Chantal Vogels, Annie Watkins, Chaney Kalinich, Jessica Rothman, Marie L. Landry, Nathan Grubaugh                                                                         |

|                                                                                                                                                         |                                                                                             |                                                                                                                    |                                                                                                                                                                                                                                                                                                                                                                                                                                                                                                                                                                                                                                                                                                                                                                    |  |
|---------------------------------------------------------------------------------------------------------------------------------------------------------|---------------------------------------------------------------------------------------------|--------------------------------------------------------------------------------------------------------------------|--------------------------------------------------------------------------------------------------------------------------------------------------------------------------------------------------------------------------------------------------------------------------------------------------------------------------------------------------------------------------------------------------------------------------------------------------------------------------------------------------------------------------------------------------------------------------------------------------------------------------------------------------------------------------------------------------------------------------------------------------------------------|--|
| EPI_ISL_1447670                                                                                                                                         |                                                                                             |                                                                                                                    |                                                                                                                                                                                                                                                                                                                                                                                                                                                                                                                                                                                                                                                                                                                                                                    |  |
| EPI_ISL_1448034, EPI_ISL_1448041                                                                                                                        | Maryland Genomics, Institute for Genome Sciences, University of Maryland School of Medicine | Maryland Genomics, Institute for Genome Sciences, University of Maryland School of Medicine                        | Tallon, Luke J; Sadzewicz, Lisa D; Humphrys, Mike; Ott, Sandra; Roussey, Holly; Mehta, Aditya; Vavikolanu, Kranthi; Fraser, Claire M; Ravel, Jacques                                                                                                                                                                                                                                                                                                                                                                                                                                                                                                                                                                                                               |  |
| EPI_ISL_1448375                                                                                                                                         | UW Virology Lab                                                                             | UW Virology Lab                                                                                                    | Pavitra Roychoudhury, Hong Xie, Lasata Shrestha, Shah Mohamed Bakhsh, Michelle Lin, Noah R. Baker, Sean Ellis, Saraswathi Sathees, Meei-Li Huang, Keith R Jerome, Alexander Greninger                                                                                                                                                                                                                                                                                                                                                                                                                                                                                                                                                                              |  |
| EPI_ISL_1454536                                                                                                                                         | Lighthouse Lab in Cambridge                                                                 | Wellcome Sanger Institute for the COVID-19 Genomics UK (COG-UK) Consortium                                         | Rob Howes, The Lighthouse Lab in Cambridge and Alex Alderton, Roberto Amato, Jeffrey Barrett, Sonia Goncalves, Ewan Harrison, David K. Jackson, Ian Johnston, Dominic Kwiatkowski, Cordelia Langford, John Sillitoe on behalf of the Wellcome Sanger Institute COVID-19 Surveillance Team                                                                                                                                                                                                                                                                                                                                                                                                                                                                          |  |
| EPI_ISL_1457561                                                                                                                                         | Dutch COVID-19 response team                                                                | National Institute for Public Health and the Environment (RIVM)                                                    | Adam Meijer, Harry Vennema, Dirk Eggink, Jeroen Cremer, Sharon van den Brink, Bas van der Veer, AnneMarie van den Brandt, Lisa Wijsman, Kim Freriks, Rianne Jaarsma, Eunice Then, Jolienke Hardeman, Lynn Aarts, Sanne Bos, Melissa van Tuil, Robert Kohl, Linda van de Nes, Sjoerd Kulling, James Groot, Florian Zwagemaker, Dennis Schmitz, Annelies Kroneman, Karim Hajji, Chantal Reusken, on behalf of the national COVID-19 response team                                                                                                                                                                                                                                                                                                                    |  |
| EPI_ISL_1461295                                                                                                                                         | ALBANY MEDICAL CENTER                                                                       | Wadsworth Center, New York State Department of Health                                                              | Kirsten St. George, Daryl M. Lamson, Alexis Russell, Matthew Shudt, Melissa A Leisner, Jonathan Plitnick, Catharine Prussing, Navjot Singh, John Kelly, Erasmus Schneider, Erica Lasek-Nesselquist                                                                                                                                                                                                                                                                                                                                                                                                                                                                                                                                                                 |  |
| EPI_ISL_1461365, EPI_ISL_1461366, EPI_ISL_1461367                                                                                                       | TEMPUS LABS INC                                                                             | Wadsworth Center, New York State Department of Health                                                              | Kirsten St. George, Daryl M. Lamson, Alexis Russell, Matthew Shudt, Melissa A Leisner, Jonathan Plitnick, Catharine Prussing, Navjot Singh, John Kelly, Erasmus Schneider, Erica Lasek-Nesselquist                                                                                                                                                                                                                                                                                                                                                                                                                                                                                                                                                                 |  |
| EPI_ISL_1461644                                                                                                                                         | CHU NIMES                                                                                   | CHU NIMES                                                                                                          | Stephan Robin, Marie-josée Carles, Sophie Bravo, Agathe Boudet                                                                                                                                                                                                                                                                                                                                                                                                                                                                                                                                                                                                                                                                                                     |  |
| EPI_ISL_1461683                                                                                                                                         | Virginia Division of Consolidated Laboratory Services                                       | Virginia Division of Consolidated Laboratory Services                                                              | Virginia DCLS                                                                                                                                                                                                                                                                                                                                                                                                                                                                                                                                                                                                                                                                                                                                                      |  |
| EPI_ISL_1462500                                                                                                                                         | SUNY UPSTATE MEDICAL UNIVERSITY                                                             | Wadsworth Center, New York State Department of Health                                                              | Kirsten St. George, Daryl M. Lamson, Alexis Russell, Matthew Shudt, Melissa A Leisner, Jonathan Plitnick, Catharine Prussing, Navjot Singh, John Kelly, Erasmus Schneider, Erica Lasek-Nesselquist                                                                                                                                                                                                                                                                                                                                                                                                                                                                                                                                                                 |  |
| EPI_ISL_1465674, EPI_ISL_1465677                                                                                                                        | THE MARY IMOGENE BASSETT HOSPITAL                                                           | Wadsworth Center, New York State Department of Health                                                              | Kirsten St. George, Daryl M. Lamson, Alexis Russell, Matthew Shudt, Melissa A Leisner, Jonathan Plitnick, Catharine Prussing, Navjot Singh, John Kelly, Erasmus Schneider, Erica Lasek-Nesselquist                                                                                                                                                                                                                                                                                                                                                                                                                                                                                                                                                                 |  |
| EPI_ISL_1465691                                                                                                                                         | SUNY UPSTATE MEDICAL UNIVERSITY                                                             | Wadsworth Center, New York State Department of Health                                                              | Kirsten St. George, Daryl M. Lamson, Alexis Russell, Matthew Shudt, Melissa A Leisner, Jonathan Plitnick, Catharine Prussing, Navjot Singh, John Kelly, Erasmus Schneider, Erica Lasek-Nesselquist                                                                                                                                                                                                                                                                                                                                                                                                                                                                                                                                                                 |  |
| EPI_ISL_1465865                                                                                                                                         | TEMPUS LABS INC                                                                             | Wadsworth Center, New York State Department of Health                                                              | Kirsten St. George, Daryl M. Lamson, Alexis Russell, Matthew Shudt, Melissa A Leisner, Jonathan Plitnick, Catharine Prussing, Navjot Singh, John Kelly, Erasmus Schneider, Erica Lasek-Nesselquist                                                                                                                                                                                                                                                                                                                                                                                                                                                                                                                                                                 |  |
| EPI_ISL_1468561                                                                                                                                         | Johns Hopkins Hospital Department of Pathology                                              | Johns Hopkins Hospital Department of Pathology                                                                     | C. Paul Morris, Chun Huai Luo, Adannaya Amadi, Matthew Schwartz, Heba H. Mostafa                                                                                                                                                                                                                                                                                                                                                                                                                                                                                                                                                                                                                                                                                   |  |
| EPI_ISL_1468693                                                                                                                                         | Altius Institute                                                                            | Seattle Flu Study                                                                                                  | Deborah A. Nickerson, Chris D. Frazar, Jover Lee, Benjamin Pelle, Erica Ryke, Matthew Richardson, Amanda Adler, Elisabeth Brandstetter, Peter D. Han, Kairsten Fay, Misja Ilicisin, Kirsten Lacombe, Thomas R. Sibley, Melissa Truong, Caitlin R. Wolf, Ryan Alexander, Daniel Bates, Rebecca Bruders, Stephanie DeBaun, Clem Green, Muhammad Halimun, Jessica Halow, Kneshay Harper, Matt Hartman, Andrew Meuser, Alex Nguyen, Truong Nguyen, Sofia Olsson, Sadie Patraw, Hannah Petersen, Tobias Ragoczy, Joshua Richards, Jacob Rodriguez, John Stamatoyannopoulos, Julia Wald, Olivia Waltner, Michael Boeckh, Janet A. Englund, Michael Famulare, Barry R. Lutz, Mark J. Rieder, Lea M. Starita, Matthew Thompson, Helen Y. Chu, Jay Shendure, Trevor Bedford |  |
| EPI_ISL_1470380, EPI_ISL_1470381, EPI_ISL_1470382, EPI_ISL_1470383, EPI_ISL_1470397, EPI_ISL_1470398, EPI_ISL_1470399, EPI_ISL_1470400, EPI_ISL_1470401 | Kentucky State Public Health Lab                                                            | Kentucky State Public Health Lab                                                                                   | Stephanie Lunn, Karim George, Joshua Tobias, William Grooms, Vaneet Arora, Matthew Johnson, Rachel Zinner, Rhonda Lucas                                                                                                                                                                                                                                                                                                                                                                                                                                                                                                                                                                                                                                            |  |
| EPI_ISL_1470810, EPI_ISL_1471392, EPI_ISL_1471594, EPI_ISL_1471660, EPI_ISL_1471681, EPI_ISL_1471711, EPI_ISL_1471937, EPI_ISL_1471985                  | Pandemic Response Lab - NYC                                                                 | Pandemic Response Lab, R&D                                                                                         | Henry Lee, Michael Hammerling, Melissa Hopkins, Cybill del Castillo, Shinyoung Clair Kang, William Ward, Pradeep Bugga, Sol Rey, Dylan Law, Haiping Hao, Jon Laurent                                                                                                                                                                                                                                                                                                                                                                                                                                                                                                                                                                                               |  |
| EPI_ISL_1472331, EPI_ISL_1472332, EPI_ISL_1472333, EPI_ISL_1472334                                                                                      | Hokkaido Institute of Public Health                                                         | Hokkaido Institute of Public Health                                                                                | Yuta Ohno, Kazuhiro Okubo, Hiroki Yamaguchi, Tetsuya Ikeda, Tsuyoshi Sekizuka, Kentaro Itokawa, Rina Tanaka, Masanori Hashino, Makoto Kuroda                                                                                                                                                                                                                                                                                                                                                                                                                                                                                                                                                                                                                       |  |
| EPI_ISL_1481630, EPI_ISL_1481650, EPI_ISL_1482193, EPI_ISL_1482261                                                                                      | Fulgent Genetics                                                                            | Centers for Disease Control and Prevention Division of Viral Diseases, Pathogen Discovery                          | Dakota Howard, Dhvani Batra, Peter W. Cook, Kara Moser, Adrian Paskey, Jason Caravas, Benjamin Rambo-Martin, Shatavia Morrison, Christopher Gulvick, Scott Sammons, Yvette Unoarumhi, Darlene Wagner, Matthew Schmeer, Harry Gao, Mickey Li, John Gao, Joseph Fierro, Benafsh Saprà, Becky Tsai, Yan Meng, Doreen Ng, James Xie, Clinton R. Paden, Duncan MacCannell                                                                                                                                                                                                                                                                                                                                                                                               |  |
| EPI_ISL_1482275                                                                                                                                         | SUNY UPSTATE MEDICAL UNIVERSITY                                                             | Wadsworth Center, New York State Department of Health                                                              | Kirsten St. George, Daryl M. Lamson, Alexis Russell, Matthew Shudt, Melissa A Leisner, Jonathan Plitnick, Catharine Prussing, Navjot Singh, John Kelly, Erasmus Schneider, Erica Lasek-Nesselquist                                                                                                                                                                                                                                                                                                                                                                                                                                                                                                                                                                 |  |
| EPI_ISL_1482447                                                                                                                                         | BOSTON HEART DIAGNOSTICS CORP                                                               | Wadsworth Center, New York State Department of Health                                                              | Kirsten St. George, Daryl M. Lamson, Alexis Russell, Matthew Shudt, Melissa A Leisner, Jonathan Plitnick, Catharine Prussing, Navjot Singh, John Kelly, Erasmus Schneider, Erica Lasek-Nesselquist                                                                                                                                                                                                                                                                                                                                                                                                                                                                                                                                                                 |  |
| EPI_ISL_1482919                                                                                                                                         | MUSC Molecular Pathology Laboratory                                                         | MUSC Molecular Pathology Laboratory                                                                                | Julie W. Hirschhorn, W. Bailey Glen Jr, Dariusz Pytel, Jaclyn Dunne, Kristen Maurer, Frederick S. Nolte                                                                                                                                                                                                                                                                                                                                                                                                                                                                                                                                                                                                                                                            |  |
| EPI_ISL_1483301                                                                                                                                         | Tampa General Hospital Esoteric Lab                                                         | Tampa General Hospital Esoteric Research & Development Lab                                                         | Grant Vestal, Deanna Becker, Dominic Uy, Vicki Healer, Amorce Lima, Suzanne Silbert                                                                                                                                                                                                                                                                                                                                                                                                                                                                                                                                                                                                                                                                                |  |
| EPI_ISL_1489702, EPI_ISL_1489703, EPI_ISL_1489705, EPI_ISL_1489716                                                                                      | NJDOH, Public Health and Environmental Laboratories                                         | New Jersey Public Health and Environmental Laboratories (NJ PHEL)                                                  | Lindsey Bodnar, Shiv K. Verma, Dana Woell, Byeong Jeong                                                                                                                                                                                                                                                                                                                                                                                                                                                                                                                                                                                                                                                                                                            |  |
| EPI_ISL_1490666, EPI_ISL_1490714                                                                                                                        | The Caribbean Public Health Agency                                                          | Carrington Lab, Department of PreClinical Sciences, Faculty of Medical Sciences, The University of the West Indies | Nikita S. D. Sahadeo, Arianne Brown-Jordan, Sarah Hill, Vernie Ramkissoon, Roshan Parasram, Naresh Nandram, Avery Hinds, Jerome Foster, Stanley Giddings, Karla Georges, Marsha Ivey, Rahul Naidu, Risha Singh, SueMin Nathaniel, Rajini Haraksingh, Jaya Jayaraman, Chhina Chinnadurai, Adesh Ramsubhag, Nuno Faria, Oliver Pybus, Christopher Oura, Gabriel Escobar, Christine V. F. Carrington                                                                                                                                                                                                                                                                                                                                                                  |  |
| EPI_ISL_1491347, EPI_ISL_1491353                                                                                                                        | Kentucky State Public Health Lab                                                            | Kentucky State Public Health Lab                                                                                   | Stephanie Lunn, Karim George, Joshua Tobias, William Grooms, Vaneet Arora, Matthew Johnson, Rachel Zinner, Rhonda Lucas                                                                                                                                                                                                                                                                                                                                                                                                                                                                                                                                                                                                                                            |  |
| EPI_ISL_1491789, EPI_ISL_1491800, EPI_ISL_1491835, EPI_ISL_1491864, EPI_ISL_1491889, EPI_ISL_1491921                                                    | Aegis Sciences Corporation                                                                  | Centers for Disease Control and Prevention Division of Viral Diseases, Pathogen Discovery                          | Dakota Howard, Dhvani Batra, Peter W. Cook, Kara Moser, Adrian Paskey, Jason Caravas, Benjamin Rambo-Martin, Shatavia Morrison, Christopher Gulvick, Scott Sammons, Yvette Unoarumhi, Darlene Wagner, Matthew Schmeer, Cyndi Clark, Patrick Campbell, Rob Case, Vikramsinha Ghorpade, Holly Houdeshell, Ola Kvalvaag, Dillon Nall, Ethan Sanders, Alec Vest, Shaun Westlund, Matthew Hardison, Clinton R. Paden, Duncan MacCannell                                                                                                                                                                                                                                                                                                                                 |  |
| EPI_ISL_1491962, EPI_ISL_1491973, EPI_ISL_1492016                                                                                                       | Quest Diagnostics Incorporated                                                              | Centers for Disease Control and Prevention Division of Viral Diseases, Pathogen Discovery                          | Dakota Howard, Dhvani Batra, Peter W. Cook, Kara Moser, Adrian Paskey, Jason Caravas, Benjamin Rambo-Martin, Shatavia Morrison, Christopher Gulvick, Scott Sammons, Yvette Unoarumhi, Darlene Wagner, Matthew Schmeer, S. H. Rosenthal, A. Gerasimova, R. M. Kagan, B. Anderson, M. Hua, Y. Liu, L.E. Bernstein, K.E. Livingston, A. Perez, I. A. Shlyakhter, R. V. Rolando, R. Owen, P. Tanpaiboon, F. Lacbawan, Clinton R. Paden, Duncan MacCannell                                                                                                                                                                                                                                                                                                              |  |
| EPI_ISL_1493191, EPI_ISL_1493213                                                                                                                        | MD PHL                                                                                      | MD PHL                                                                                                             | Maryland Department of Health Laboratories Administration                                                                                                                                                                                                                                                                                                                                                                                                                                                                                                                                                                                                                                                                                                          |  |
| EPI_ISL_1494559, EPI_ISL_1494572, EPI_ISL_1494608                                                                                                       | Virginia Division of Consolidated Laboratory Services                                       | Virginia Division of Consolidated Laboratory Services                                                              | Virginia DCLS                                                                                                                                                                                                                                                                                                                                                                                                                                                                                                                                                                                                                                                                                                                                                      |  |
| EPI_ISL_1495528, EPI_ISL_1495529, EPI_ISL_1495530, EPI_ISL_1495531, EPI_ISL_1495532, EPI_ISL_1495533, EPI_ISL_1495534, EPI_ISL_1495535                  | Klinikum Wels-Grieskirchen                                                                  | Bergthaler laboratory, CeMM Research Center for Molecular Medicine of the Austrian Academy of Sciences             | Lukas Enderl, Anna Schedl, Fabian Amman, Petr Triska, Thomas Penz, Benedikt Agerer, Maelle Le Moing, Michael Schuster, Bekir Erguner, Jan Laine, Martin Senekowitsch, Christoph Bock, Andreas Bergthaler                                                                                                                                                                                                                                                                                                                                                                                                                                                                                                                                                           |  |

|                                                                                                                                                                                                                                                                                                                                                                                                                                                                                                             |                                                                                             |                                                                                                                                                  |                                                                                                                                                                                                                                                                                                                                                                                                                                                                                                                                                                                                                                                                                                                          |
|-------------------------------------------------------------------------------------------------------------------------------------------------------------------------------------------------------------------------------------------------------------------------------------------------------------------------------------------------------------------------------------------------------------------------------------------------------------------------------------------------------------|---------------------------------------------------------------------------------------------|--------------------------------------------------------------------------------------------------------------------------------------------------|--------------------------------------------------------------------------------------------------------------------------------------------------------------------------------------------------------------------------------------------------------------------------------------------------------------------------------------------------------------------------------------------------------------------------------------------------------------------------------------------------------------------------------------------------------------------------------------------------------------------------------------------------------------------------------------------------------------------------|
| EPI_ISL_1495633, EPI_ISL_1495635, EPI_ISL_1495636, EPI_ISL_1495653, EPI_ISL_1495692, EPI_ISL_1495703, EPI_ISL_1495704, EPI_ISL_1495712, EPI_ISL_1495715                                                                                                                                                                                                                                                                                                                                                     | Austrian Agency for Health and Food Safety (AGES)                                           | Bergthaler laboratory, CeMM Research Center for Molecular Medicine of the Austrian Academy of Sciences                                           | Lukas Endler, Anna Schedl, Fabian Amman, Petr Triska, Thomas Penz, Benedikt Agerer, Maelle Le Moing, Michael Schuster, Bekir Erguner, Jan Laine, Martin Senekowitsch, Christoph Bock, Andreas Bergthaler                                                                                                                                                                                                                                                                                                                                                                                                                                                                                                                 |
| EPI_ISL_1495719, EPI_ISL_1495720, EPI_ISL_1495742, EPI_ISL_1495743, EPI_ISL_1495744, EPI_ISL_1495745, EPI_ISL_1495746, EPI_ISL_1495747, EPI_ISL_1495748                                                                                                                                                                                                                                                                                                                                                     | Eiling group, Institute of Molecular Biotechnology (IMBA)                                   | Bergthaler laboratory, CeMM Research Center for Molecular Medicine of the Austrian Academy of Sciences                                           | Lukas Endler, Anna Schedl, Fabian Amman, Petr Triska, Thomas Penz, Benedikt Agerer, Maelle Le Moing, Michael Schuster, Bekir Erguner, Jan Laine, Martin Senekowitsch, Christoph Bock, Andreas Bergthaler                                                                                                                                                                                                                                                                                                                                                                                                                                                                                                                 |
| EPI_ISL_1498095, EPI_ISL_1498262, EPI_ISL_1498379                                                                                                                                                                                                                                                                                                                                                                                                                                                           | The Caribbean Public Health Agency                                                          | Carrington Lab, Department of PreClinical Sciences, Faculty of Medical Sciences, The University of the West Indies                               | Nikita S. D. Sahadeo, Arianne Brown-Jordan, Sarah Hill, Vernie Ramkissoon, Roshan Parasram, Naresh Nandram, Avery Hinds, Jerome Foster, Stanley Giddings, Karla Georges, Marsha Ivey, Rahul Naidu, Risha Singh, SueMin Nathaniel, Rajini Haraksingh, Jaya Jayaraman, Chinna Chinnadurai, Adesh Ramsubhag, Nuno Faria, Oliver Pybus, Christopher Oura, Gabriel Escobar, Christine V. F. Carrington                                                                                                                                                                                                                                                                                                                        |
| EPI_ISL_1499113, EPI_ISL_1499115                                                                                                                                                                                                                                                                                                                                                                                                                                                                            | Trinidad Public Health Laboratory                                                           | Carrington Lab, Department of PreClinical Sciences, Faculty of Medical Sciences, The University of the West Indies                               | Nikita S. D. Sahadeo, Arianne Brown-Jordan, Sarah Hill, Vernie Ramkissoon, Roshan Parasram, Naresh Nandram, Avery Hinds, Jerome Foster, Stanley Giddings, Karla Georges, Marsha Ivey, Rahul Naidu, Risha Singh, SueMin Nathaniel, Rajini Haraksingh, Jaya Jayaraman, Chinna Chinnadurai, Adesh Ramsubhag, Nuno Faria, Oliver Pybus, Christopher Oura, Gabriel Escobar, Christine V. F. Carrington                                                                                                                                                                                                                                                                                                                        |
| EPI_ISL_1500250, EPI_ISL_1500251, EPI_ISL_1500349, EPI_ISL_1500369, EPI_ISL_1500419, EPI_ISL_1500425                                                                                                                                                                                                                                                                                                                                                                                                        | Maryland Genomics, Institute for Genome Sciences, University of Maryland School of Medicine | Maryland Genomics, Institute for Genome Sciences, University of Maryland School of Medicine                                                      | Tallon, Luke J; Sadzewicz, Lisa D; Humphys, Mike; Ott, Sandra; Roussey, Holly; Mehta, Aditya; Vavikolanu, Kranthi; Fraser, Claire M; Ravel, Jacques                                                                                                                                                                                                                                                                                                                                                                                                                                                                                                                                                                      |
| EPI_ISL_1500772                                                                                                                                                                                                                                                                                                                                                                                                                                                                                             | TGen North                                                                                  | TGen North                                                                                                                                       | "Jolene Bowers, Heather Centner, Chris French, Hayley Yaglom, Ashlyn Pfeiffer, Darrin Lemmer, Dave Engelthaler, The Arizona COVID Genomics Union (ACGU)"                                                                                                                                                                                                                                                                                                                                                                                                                                                                                                                                                                 |
| EPI_ISL_1503466, EPI_ISL_1503602, EPI_ISL_1503717, EPI_ISL_1503762, EPI_ISL_1503778, EPI_ISL_1503780                                                                                                                                                                                                                                                                                                                                                                                                        | Massachusetts State Public Health Laboratory                                                | Massachusetts State Public Health Laboratory                                                                                                     | Andrew Lang, Timelia Fink, Glen Gallagher, Sandra Smole                                                                                                                                                                                                                                                                                                                                                                                                                                                                                                                                                                                                                                                                  |
| EPI_ISL_1506119                                                                                                                                                                                                                                                                                                                                                                                                                                                                                             | MD Laboratories                                                                             | Los Angeles County PHL                                                                                                                           | P. Hemarajata et al.                                                                                                                                                                                                                                                                                                                                                                                                                                                                                                                                                                                                                                                                                                     |
| EPI_ISL_1508984                                                                                                                                                                                                                                                                                                                                                                                                                                                                                             | Kaiser Regional                                                                             | Santa Clara County Public Health Laboratory                                                                                                      | Santa Clara County Public Health Department                                                                                                                                                                                                                                                                                                                                                                                                                                                                                                                                                                                                                                                                              |
| EPI_ISL_1509050, EPI_ISL_1509053, EPI_ISL_1509054, EPI_ISL_1509085, EPI_ISL_1509087                                                                                                                                                                                                                                                                                                                                                                                                                         | Department of Laboratory Medicine, Clinical Center, National Institutes of Health           | Laboratory of Parasitic Diseases, Systems Genomics Section, National Institute of Allergy and Infectious Diseases, National Institutes of Health | Allison Roder, Stephanie Banakis, Matthew Chung, Jung-ho Youn, Rachel Mercado, Wei Wang, Tara Palmore, Michael Bell, Heike Bailin, Jessica McCormick-Ell, Sanchita Das, Jennifer Kwan, Elodie Ghedin                                                                                                                                                                                                                                                                                                                                                                                                                                                                                                                     |
| EPI_ISL_1509144, EPI_ISL_1509192                                                                                                                                                                                                                                                                                                                                                                                                                                                                            | Yale Clinical Virology Lab                                                                  | Grubaugh Lab - Yale School of Public Health                                                                                                      | Joseph Fauver, Mallery Breban, Isabell Ott, Tara Alpert, Mary Petrone, Anderson Brito, Chantal Vogels, Annie Watkins, Chaney Kalinich, Jessica Rothman, Marie L. Landry, Nathan Grubaugh                                                                                                                                                                                                                                                                                                                                                                                                                                                                                                                                 |
| EPI_ISL_1509929                                                                                                                                                                                                                                                                                                                                                                                                                                                                                             | "AR Dept. of Health-PHL, Molecular Diagnostics"                                             | Genomics and Discovery, Respiratory Viruses Branch, Division of Viral Diseases, Centers for Disease Control and Prevention                       | Yan Li, Ying Tao, Jing Zhang, Brian Lynch, Anna Kelleher, Anna Montmayeur, Krista Queen, Anna Uehara, Peter Cook, Rachel Marine, Mark Burroughs, Han Jia Justin Ng, Clinton R. Paden, Haibin Wang, Justin Lee, Adam Retchless, Suxiang Tong                                                                                                                                                                                                                                                                                                                                                                                                                                                                              |
| EPI_ISL_1511565, EPI_ISL_1511592, EPI_ISL_1511595                                                                                                                                                                                                                                                                                                                                                                                                                                                           | Hospital of the University of Pennsylvania Molecular Pathology Lab                          | Bushman Lab - University of Pennsylvania                                                                                                         | John Everett, Kyle Rodino, Shantanu Reddy, Pascha Hokama, Aoife M. Roche, Young Hwang, Abigail Glascock, Scott Sherrill-Mix, Samantha A. Whiteside, Jevon Graham-Wooten, Layla A. Khatib, Ayannah S. Fitzgerald, Arupa Ganguly, Mike Feldman, Brendan Kelly, Ronald G. Collman and Frederic Bushman                                                                                                                                                                                                                                                                                                                                                                                                                      |
| EPI_ISL_1511665, EPI_ISL_1511689, EPI_ISL_1511784, EPI_ISL_1511796, EPI_ISL_1511831, EPI_ISL_1511844                                                                                                                                                                                                                                                                                                                                                                                                        | Quest Diagnostics Incorporated                                                              | Centers for Disease Control and Prevention Division of Viral Diseases, Pathogen Discovery                                                        | Dakota Howard, Dhvani Batra, Peter W. Cook, Kara Moser, Adrian Paskey, Jason Caravas, Benjamin Rambo-Martin, Shatavia Morrison, Christopher Gulvick, Scott Sammons, Yvette Unoarumhi, Darlene Wagner, Matthew Schmecher, S. H. Rosenthal, A. Gerasimova, R. M. Kagan, B. Anderson, M. Hua, Y. Liu, L.E. Bernstein, K.E. Livingston, A. Perez, I. A. Shlyakhter, R. V. Rolando, R. Owen, P. Tanpaiboon, F. Lacbawan, Clinton R. Paden, Duncan MacCannell                                                                                                                                                                                                                                                                  |
| EPI_ISL_1511944, EPI_ISL_1511993, EPI_ISL_1511994, EPI_ISL_1512015, EPI_ISL_1512142, EPI_ISL_1512147, EPI_ISL_1512159, EPI_ISL_1512192, EPI_ISL_1512228, EPI_ISL_1512256, EPI_ISL_1512262, EPI_ISL_1512265, EPI_ISL_1512276, EPI_ISL_1512288, EPI_ISL_1512290, EPI_ISL_1512297, EPI_ISL_1512361, EPI_ISL_1512375, EPI_ISL_1512406, EPI_ISL_1512455, EPI_ISL_1512483, EPI_ISL_1512507, EPI_ISL_1512517, EPI_ISL_1512534, EPI_ISL_1512555, EPI_ISL_1512625, EPI_ISL_1512627, EPI_ISL_1512638, EPI_ISL_1512655 | see above                                                                                   | Centers for Disease Control and Prevention Division of Viral Diseases, Pathogen Discovery                                                        | Dakota Howard, Dhvani Batra, Peter W. Cook, Kara Moser, Adrian Paskey, Jason Caravas, Benjamin Rambo-Martin, Shatavia Morrison, Christopher Gulvick, Scott Sammons, Yvette Unoarumhi, Darlene Wagner, Matthew Schmecher, Eileen de Feo, Jan Antico, Christine Tran, Matthew Tolentino, Shannon Wickline, Kim Gietzen, Brad Sickler, Jingtao Liu, Eric Allen, Phil Febbo, Nicole L. Washington, Simon White, Geraint Levan, Kelly Schiabor Barrett, Elizabeth Cirulli, Alexandre Bolze, Ary Ascencio, Charlotte Rivera-Garcia, Ryan Cho, Jason Nguyen, Sherry Wang, Jimmy Ramirez, Tyler Cassens, Efrén Sandoval, Magnus Isaksson, William Lee, David Becker, Marc Laurent, James Lu, Clinton R. Paden, Duncan MacCannell |
| EPI_ISL_1512833, EPI_ISL_1512838, EPI_ISL_1512905, EPI_ISL_1512920, EPI_ISL_1512952, EPI_ISL_1512954, EPI_ISL_1513028, EPI_ISL_1513031, EPI_ISL_1513080, EPI_ISL_1513097                                                                                                                                                                                                                                                                                                                                    | Infinity Biologix                                                                           | Centers for Disease Control and Prevention Division of Viral Diseases, Pathogen Discovery                                                        | Dakota Howard, Dhvani Batra, Peter W. Cook, Kara Moser, Adrian Paskey, Jason Caravas, Benjamin Rambo-Martin, Shatavia Morrison, Christopher Gulvick, Scott Sammons, Yvette Unoarumhi, Darlene Wagner, Matthew Schmecher, Christian Bixby, Yihe Wang, Jonathan Schultz, Chirayu Goswami, Russ Hager, Robin Grimwood, Clinton R. Paden, Duncan MacCannell                                                                                                                                                                                                                                                                                                                                                                  |
| EPI_ISL_1513157, EPI_ISL_1513230, EPI_ISL_1513281, EPI_ISL_1513282, EPI_ISL_1513285, EPI_ISL_1513292, EPI_ISL_1513355, EPI_ISL_1513444, EPI_ISL_1513463, EPI_ISL_1513469, EPI_ISL_1513492, EPI_ISL_1513512                                                                                                                                                                                                                                                                                                  | see above                                                                                   | Aegis Sciences Corporation                                                                                                                       | Centers for Disease Control and Prevention Division of Viral Diseases, Pathogen Discovery                                                                                                                                                                                                                                                                                                                                                                                                                                                                                                                                                                                                                                |
| EPI_ISL_1513800, EPI_ISL_1513921, EPI_ISL_1513933, EPI_ISL_1513950, EPI_ISL_1513951, EPI_ISL_1513952, EPI_ISL_1513983, EPI_ISL_1514018, EPI_ISL_1514041, EPI_ISL_1514097, EPI_ISL_1514221, EPI_ISL_1514225, EPI_ISL_1514314, EPI_ISL_1514340, EPI_ISL_1514388, EPI_ISL_1514495, EPI_ISL_1514520, EPI_ISL_1514607, EPI_ISL_1514662, EPI_ISL_1514677, EPI_ISL_1514909, EPI_ISL_1515028, EPI_ISL_1515506                                                                                                       | see above                                                                                   | Laboratory Corporation of America                                                                                                                | Centers for Disease Control and Prevention Division of Viral Diseases, Pathogen Discovery                                                                                                                                                                                                                                                                                                                                                                                                                                                                                                                                                                                                                                |
| EPI_ISL_1516177                                                                                                                                                                                                                                                                                                                                                                                                                                                                                             | NJ Public Health and Environmental Laboratories                                             | Centers for Disease Control and Prevention Division of Viral Diseases, Pathogen Discovery                                                        | Mili Sheth, Sarah Nobles, Jasmine Padilla, Mark Burroughs, Shoshona Le, Katie Dillon, Peter Cook, Clinton R. Paden, Dhvani Batra, Krista Queen, Kristen Knipe, Dakota Howard, Yvette Unoarumhi, Darlene Wagner, Matthew Schmecher, Ben L. Rambo-Martin, Kristine Lacek, Sam Shepard, Alison Laufer Halpin, Dave Wentworth, Vivien Dugan, Suxiang Tong, Justin Lee                                                                                                                                                                                                                                                                                                                                                        |
| EPI_ISL_1516268                                                                                                                                                                                                                                                                                                                                                                                                                                                                                             | VVDHHR - Office of Laboratory Services                                                      | Centers for Disease Control and Prevention Division of Viral Diseases, Pathogen Discovery                                                        | Mili Sheth, Sarah Nobles, Jasmine Padilla, Mark Burroughs, Shoshona Le, Katie Dillon, Peter Cook, Clinton R. Paden, Dhvani Batra, Krista Queen, Kristen Knipe, Dakota Howard, Yvette Unoarumhi, Darlene Wagner, Matthew Schmecher, Ben L. Rambo-Martin, Kristine Lacek, Sam Shepard, Alison Laufer Halpin, Dave Wentworth, Vivien Dugan, Suxiang Tong, Justin Lee                                                                                                                                                                                                                                                                                                                                                        |
| EPI_ISL_1516353, EPI_ISL_1516356                                                                                                                                                                                                                                                                                                                                                                                                                                                                            | KY State Public Health Lab                                                                  | Centers for Disease Control and Prevention Division of Viral Diseases, Pathogen Discovery                                                        | Mili Sheth, Sarah Nobles, Jasmine Padilla, Mark Burroughs, Shoshona Le, Katie Dillon, Peter Cook, Clinton R. Paden, Dhvani Batra, Krista Queen, Kristen Knipe, Dakota Howard, Yvette Unoarumhi, Darlene Wagner, Matthew Schmecher, Ben L. Rambo-Martin, Kristine Lacek, Sam Shepard, Alison Laufer Halpin, Dave Wentworth, Vivien Dugan, Suxiang Tong, Justin Lee                                                                                                                                                                                                                                                                                                                                                        |

|                                                                                                                                                                          |                                                                          |                                                                                           |                                                                                                                                                                                                                                                                                                                                                                                                                                                        |
|--------------------------------------------------------------------------------------------------------------------------------------------------------------------------|--------------------------------------------------------------------------|-------------------------------------------------------------------------------------------|--------------------------------------------------------------------------------------------------------------------------------------------------------------------------------------------------------------------------------------------------------------------------------------------------------------------------------------------------------------------------------------------------------------------------------------------------------|
| EPI_ISL_1516459, EPI_ISL_1516462, EPI_ISL_1516515, EPI_ISL_1516571                                                                                                       | Broad Institute Clinical Research Sequencing Platform                    | Infectious Disease Program, Broad Institute of Harvard and MIT                            | Siddle,K.J., Adams,G., Peariman,L., Gladden-Young,A., Vicente,G., Blumenstiel,B., DeFelice,M., Lee,M., McGovern,S., Lagerborg,K., Rudy,M., DeRuff,K., Carter,A., Normandin,E., Bauer,M., Reilly,S., Tomkins-Tinch,C., Loreth,C., Chaluvadi,S., Meldrim,J., Granger,B., Lemieux,J.E., Birren,B.W., Sabeti,P.C., Larkin,K., Dodge,S., Lennon.N., Madoff,L., Brown,C., Gallagher,G., Smole,S., Park,D.J., Gabriel,S., and MacInnis.B.L.                   |
| EPI_ISL_1516604, EPI_ISL_1516629, EPI_ISL_1516639, EPI_ISL_1516640, EPI_ISL_1516658, EPI_ISL_1516664                                                                     | Rhode Island Department of Health                                        | Infectious Disease Program, Broad Institute of Harvard and MIT                            | Siddle,K.J., Azevedo,K., Miller,A., Adams,G., Pearlman,L., Gladden-Young,A., Lagerborg,K., Rudy,M., DeRuff,K., Carter,A., Normandin,E., Bauer,M., Reilly,S., Tomkins-Tinch,C., Loreth,C., Chaluvadi,S., Lemieux,J.E., Birren,B.W., Sabeti,P.C., Huard,R., King,E., Park,D.J., and MacInnis,B.L.                                                                                                                                                        |
| EPI_ISL_1516691, EPI_ISL_1516695, EPI_ISL_1516697, EPI_ISL_1516699, EPI_ISL_1516703, EPI_ISL_1516704, EPI_ISL_1516713, EPI_ISL_1516714, EPI_ISL_1516731, EPI_ISL_1516741 | Broad Institute Clinical Research Sequencing Platform                    | Infectious Disease Program, Broad Institute of Harvard and MIT                            | Siddle,K.J., Adams,G., Peariman,L., Gladden-Young,A., Vicente,G., Blumenstiel,B., DeFelice,M., Lee,M., McGovern,S., Lagerborg,K., Rudy,M., DeRuff,K., Carter,A., Normandin,E., Bauer,M., Reilly,S., Tomkins-Tinch,C., Loreth,C., Chaluvadi,S., Meldrim,J., Granger,B., Lemieux,J.E., Birren,B.W., Sabeti,P.C., Larkin,K., Dodge,S., Lennon.N., Madoff,L., Brown,C., Gallagher,G., Smole,S., Park,D.J., Gabriel,S., and MacInnis.B.L.                   |
| EPI_ISL_1522085, EPI_ISL_1522233                                                                                                                                         | Dutch COVID-19 response team                                             | National Institute for Public Health and the Environment (RIVM)                           | Adam Meijer, Harry Vennema, Dirk Eggink, Jeroen Cremer, Sharon van den Brink, Bas van der Veer, AnneMarie van den Brandt, Lisa Wijsman, Kim Freeriks, Ryanne Jaarsma, Eunice Then, Jolienke Hardeman, Lynn Aarts, Sanne Bos, Melissa van Tuil, Robert Kohl, Linda van de Nes, Sjoerd Kuitling, James Groot, Florian Zwagemaker, Dennis Schmitz, Annelies Kroneman, Karim Hajji, Chantal Reusken, on behalf of the national COVID-19 response team      |
| EPI_ISL_1523778                                                                                                                                                          | Maine Health and Environmental Testing Laboratory                        | Tewhey Lab, The Jackson Laboratory                                                        | Matluk,N., Dewey,H., Iosue,F., Barter,M., Lynch,R., Munger,H. and Tewhey,R.                                                                                                                                                                                                                                                                                                                                                                            |
| EPI_ISL_1525032, EPI_ISL_1525136, EPI_ISL_1525202, EPI_ISL_1525213                                                                                                       | Aegis Sciences Corporation                                               | Centers for Disease Control and Prevention Division of Viral Diseases, Pathogen Discovery | Dakota Howard, Dhvani Batra, Peter W. Cook, Kara Moser, Adrian Paskey, Jason Caravas, Benjamin Rambo-Martin, Shatavia Morrison, Christopher Gulvick, Scott Sammons, Yvette Unoarumhi, Darlene Wagner, Matthew Schmerer, Cyndi Clark, Patrick Campbell, Rob Case, Vikramsinha Ghorpade, Holly Houdeshell, Ola Kvalvaag, Dillon Nall, Ethan Sanders, Alec Vest, Shaun Westlund, Matthew Hardison, Clinton R. Paden, Duncan MacCannell                    |
| EPI_ISL_1525374, EPI_ISL_1525379, EPI_ISL_1525386, EPI_ISL_1525472, EPI_ISL_1525684, EPI_ISL_1525805, EPI_ISL_1525823                                                    | Fulgent Genetics                                                         | Centers for Disease Control and Prevention Division of Viral Diseases, Pathogen Discovery | Dakota Howard, Dhvani Batra, Peter W. Cook, Kara Moser, Adrian Paskey, Jason Caravas, Benjamin Rambo-Martin, Shatavia Morrison, Christopher Gulvick, Scott Sammons, Yvette Unoarumhi, Darlene Wagner, Matthew Schmerer, Harry Gao, Mickey Li, John Gao, Joseph Fierro, Benafsh Sapra, Becky Tsai, Yan Meng, Doreen Ng, James Xie, Clinton R. Paden, Duncan MacCannell                                                                                  |
| EPI_ISL_1525936, EPI_ISL_1526011, EPI_ISL_1526036                                                                                                                        | Quest Diagnostics Incorporated                                           | Centers for Disease Control and Prevention Division of Viral Diseases, Pathogen Discovery | Dakota Howard, Dhvani Batra, Peter W. Cook, Kara Moser, Adrian Paskey, Jason Caravas, Benjamin Rambo-Martin, Shatavia Morrison, Christopher Gulvick, Scott Sammons, Yvette Unoarumhi, Darlene Wagner, Matthew Schmerer, S. H. Rosenthal, A. Gerasimova, R. M. Kagan, B. Anderson, M. Hua, Y. Liu, L.E. Bernstein, K.E. Livingston, A. Perez, I. A. Shlyakhter, R. V. Rolando, R. Owen, P. Tanpaiboon, F. Lacbawan, Clinton R. Paden, Duncan MacCannell |
| EPI_ISL_1526517                                                                                                                                                          | CNR Virus des Infections Respiratoires - France SUD                      | CNR Virus des Infections Respiratoires - France SUD                                       | Antonin Bal, Gregory Destras, Gwendolyne Burfin, Hadrien Regue, Quentin Semanas, Martine Valette, Bruno Lina, Laurence Josset                                                                                                                                                                                                                                                                                                                          |
| EPI_ISL_1526859, EPI_ISL_1526863, EPI_ISL_1526864, EPI_ISL_1526888, EPI_ISL_1526897, EPI_ISL_1526902, EPI_ISL_1526908                                                    | Virginia Division of Consolidated Laboratory Services                    | Virginia Division of Consolidated Laboratory Services                                     | Virginia DCLS                                                                                                                                                                                                                                                                                                                                                                                                                                          |
| EPI_ISL_1527047, EPI_ISL_1527051                                                                                                                                         | University of Mississippi Medical Center, Department of Pathology        | University of Mississippi Medical Center, Molecular and Genomics Core Facility            | Ashley C. Johnson, Ithiel J. Frame, Krishna K. Ayyalasomayajula, Michael R. Garrett, D. Ashley Robinson                                                                                                                                                                                                                                                                                                                                                |
| EPI_ISL_1527096, EPI_ISL_1527104, EPI_ISL_1527208, EPI_ISL_1527215                                                                                                       | Massachusetts State Public Health Laboratory                             | Massachusetts State Public Health Laboratory                                              | Andrew Lang, Timelia Fink, Glen Gallagher, Sandra Smole                                                                                                                                                                                                                                                                                                                                                                                                |
| EPI_ISL_1527243                                                                                                                                                          | University of Mississippi Medical Center, Department of Pathology        | University of Mississippi Medical Center, Molecular and Genomics Core Facility            | Ashley C. Johnson, Ithiel J. Frame, Krishna K. Ayyalasomayajula, Michael R. Garrett, D. Ashley Robinson                                                                                                                                                                                                                                                                                                                                                |
| EPI_ISL_1527536                                                                                                                                                          | School of Pharmacy, Shenandoah University                                | School of Pharmacy, Shenandoah University                                                 | Adams,S.M., Harralson,A.F., Kidd,R.S., Sawyer,G.W.                                                                                                                                                                                                                                                                                                                                                                                                     |
| EPI_ISL_1528048                                                                                                                                                          | Michigan Department of Health and Human Services, Bureau of Laboratories | Michigan Department of Health and Human Services, Bureau of Laboratories                  | Blankenship HM, Riner D, Soehnlén MK                                                                                                                                                                                                                                                                                                                                                                                                                   |
| EPI_ISL_1528096                                                                                                                                                          | Massachusetts State Public Health Laboratory                             | Massachusetts State Public Health Laboratory                                              | Andrew Lang, Timelia Fink, Glen Gallagher, Sandra Smole                                                                                                                                                                                                                                                                                                                                                                                                |
| EPI_ISL_1528444                                                                                                                                                          | WVDHHR - Office of Laboratory Services                                   | Centers for Disease Control and Prevention Division of Viral Diseases, Pathogen Discovery | Mili Sheth, Sarah Nobles, Jasmine Padilla, Mark Burroughs, Shoshona Le, Katie Dillon, Peter Cook, Clinton R. Paden, Dhvani Batra, Krista Queen, Kristen Knipe, Dakota Howard, Yvette Unoarumhi, Darlene Wagner, Matthew Schmerer, Ben L. Rambo-Martin, Kristine Lacek, Sam Shepard, Alison Laufer Halpin, Dave Wentworth, Vivien Dugan, Suxiang Tong, Justin Lee                                                                                       |
| EPI_ISL_1528451, EPI_ISL_1528455, EPI_ISL_1528458                                                                                                                        | MD DOH Laboratories Administration                                       | Centers for Disease Control and Prevention Division of Viral Diseases, Pathogen Discovery | Mili Sheth, Sarah Nobles, Jasmine Padilla, Mark Burroughs, Shoshona Le, Katie Dillon, Peter Cook, Clinton R. Paden, Dhvani Batra, Krista Queen, Kristen Knipe, Dakota Howard, Yvette Unoarumhi, Darlene Wagner, Matthew Schmerer, Ben L. Rambo-Martin, Kristine Lacek, Sam Shepard, Alison Laufer Halpin, Dave Wentworth, Vivien Dugan, Suxiang Tong, Justin Lee                                                                                       |
| EPI_ISL_1528464, EPI_ISL_1528474                                                                                                                                         | RI State Health Laboratories                                             | Centers for Disease Control and Prevention Division of Viral Diseases, Pathogen Discovery | Mili Sheth, Sarah Nobles, Jasmine Padilla, Mark Burroughs, Shoshona Le, Katie Dillon, Peter Cook, Clinton R. Paden, Dhvani Batra, Krista Queen, Kristen Knipe, Dakota Howard, Yvette Unoarumhi, Darlene Wagner, Matthew Schmerer, Ben L. Rambo-Martin, Kristine Lacek, Sam Shepard, Alison Laufer Halpin, Dave Wentworth, Vivien Dugan, Suxiang Tong, Justin Lee                                                                                       |
| EPI_ISL_1528506                                                                                                                                                          | *PA Department of Health, Bureau of Laboratories*                        | Centers for Disease Control and Prevention Division of Viral Diseases, Pathogen Discovery | Mili Sheth, Sarah Nobles, Jasmine Padilla, Mark Burroughs, Shoshona Le, Katie Dillon, Peter Cook, Clinton R. Paden, Dhvani Batra, Krista Queen, Kristen Knipe, Dakota Howard, Yvette Unoarumhi, Darlene Wagner, Matthew Schmerer, Ben L. Rambo-Martin, Kristine Lacek, Sam Shepard, Alison Laufer Halpin, Dave Wentworth, Vivien Dugan, Suxiang Tong, Justin Lee                                                                                       |
| EPI_ISL_1528529                                                                                                                                                          | GA Department of Public Health Laboratory                                | Centers for Disease Control and Prevention Division of Viral Diseases, Pathogen Discovery | Mili Sheth, Sarah Nobles, Jasmine Padilla, Mark Burroughs, Shoshona Le, Katie Dillon, Peter Cook, Clinton R. Paden, Dhvani Batra, Krista Queen, Kristen Knipe, Dakota Howard, Yvette Unoarumhi, Darlene Wagner, Matthew Schmerer, Ben L. Rambo-Martin, Kristine Lacek, Sam Shepard, Alison Laufer Halpin, Dave Wentworth, Vivien Dugan, Suxiang Tong, Justin Lee                                                                                       |
| EPI_ISL_1528554, EPI_ISL_1528561, EPI_ISL_1528568, EPI_ISL_1528571, EPI_ISL_1528577                                                                                      | WVU Rapid Development Lab                                                | WVU and Marshall University Combined Genomics Core Facilities                             | *James Denvir, Peter Stoilov, Peter Perrotta, Wesley Kimble, Ryan Percifield*                                                                                                                                                                                                                                                                                                                                                                          |
| EPI_ISL_1528579, EPI_ISL_1528591, EPI_ISL_1528746                                                                                                                        | Berkeley Medical Center                                                  | WVU and Marshall University Combined Genomics Core Facilities                             | *James Denvir, Peter Stoilov, Peter Perrotta, Wesley Kimble, Ryan Percifield*                                                                                                                                                                                                                                                                                                                                                                          |
| EPI_ISL_1528888                                                                                                                                                          | 4952 MacCorkle Ave SE, Charleston, WV 25304                              | WVU and Marshall University Combined Genomics Core Facilities                             | *James Denvir, Peter Stoilov, Peter Perrotta, Wesley Kimble, Ryan Percifield*                                                                                                                                                                                                                                                                                                                                                                          |
| EPI_ISL_1530700                                                                                                                                                          | Sonora Quest Laboratories                                                | TGen North                                                                                | Jolene Bowers, Heather Centner, Chris French, Hayley Yaglom, Ashlyn Pfeiffer, Darrin Lemmer, Dave Engelthaler, The Arizona COVID Genomics Union (ACGU)                                                                                                                                                                                                                                                                                                 |
| EPI_ISL_1530875, EPI_ISL_1530876                                                                                                                                         | Genome Analysis Center, Kamma Memorial Hospital                          | Genome Analysis Center, Kamma Memorial Hospital                                           | Hanako Yazawa, Jun Ishii, Satoko Soma, Kaori Watanabe, Takuya Yazawa, Michiaki Masuda, Hiroshi Kamma                                                                                                                                                                                                                                                                                                                                                   |
| EPI_ISL_1531013, EPI_ISL_1531017, EPI_ISL_1531078, EPI_ISL_1531079, EPI_ISL_1531083, EPI_ISL_1531085, EPI_ISL_1531090                                                    | Florida Bureau of Public Health Laboratories                             | Florida Bureau of Public Health Laboratories                                              | Sarah Schmedes, Jason Blanton                                                                                                                                                                                                                                                                                                                                                                                                                          |
| EPI_ISL_1531741                                                                                                                                                          | School of Pharmacy, Shenandoah University                                | School of Pharmacy, Shenandoah University                                                 | Adams,S.M., Harralson,A.F., Kidd,R.S., Sawyer,G.W.                                                                                                                                                                                                                                                                                                                                                                                                     |
| EPI_ISL_1533880                                                                                                                                                          | SYNLAB                                                                   | GIGA Medical Genomics                                                                     | Keith Durkin, Maria Artesi, Sébastien Bontems, Raphaël Boreux, Bouchra Boujemla, Nathalie Renotte, Cécile Meex, Pierrette Melin, Marie-Pierre Hayette,                                                                                                                                                                                                                                                                                                 |

|                                                                                                                                                                                                                                                                                                                                                                                                                                                                                                                                                                                                                                                                                                                                                                                                                                                                                                                                                                                                                                                                                                               |                                                                          |                                                                                           |                                                                                                                                                                                                                                                                                                                                                                                                                                                        |                                                                                                                                                                                                                                                                                                                                                                                                                                                                                                                                                                                                                                                                                                                          |
|---------------------------------------------------------------------------------------------------------------------------------------------------------------------------------------------------------------------------------------------------------------------------------------------------------------------------------------------------------------------------------------------------------------------------------------------------------------------------------------------------------------------------------------------------------------------------------------------------------------------------------------------------------------------------------------------------------------------------------------------------------------------------------------------------------------------------------------------------------------------------------------------------------------------------------------------------------------------------------------------------------------------------------------------------------------------------------------------------------------|--------------------------------------------------------------------------|-------------------------------------------------------------------------------------------|--------------------------------------------------------------------------------------------------------------------------------------------------------------------------------------------------------------------------------------------------------------------------------------------------------------------------------------------------------------------------------------------------------------------------------------------------------|--------------------------------------------------------------------------------------------------------------------------------------------------------------------------------------------------------------------------------------------------------------------------------------------------------------------------------------------------------------------------------------------------------------------------------------------------------------------------------------------------------------------------------------------------------------------------------------------------------------------------------------------------------------------------------------------------------------------------|
|                                                                                                                                                                                                                                                                                                                                                                                                                                                                                                                                                                                                                                                                                                                                                                                                                                                                                                                                                                                                                                                                                                               |                                                                          |                                                                                           | Vincent Bours                                                                                                                                                                                                                                                                                                                                                                                                                                          |                                                                                                                                                                                                                                                                                                                                                                                                                                                                                                                                                                                                                                                                                                                          |
| EPI_ISL_1534497, EPI_ISL_1534498, EPI_ISL_1534506                                                                                                                                                                                                                                                                                                                                                                                                                                                                                                                                                                                                                                                                                                                                                                                                                                                                                                                                                                                                                                                             | Ministry of Health Turkey                                                | Ministry of Health Turkey                                                                 | Fatma Bayraktar, Yasemin Cosgun, Suleyman Yalcin, Gulay Korukluoglu                                                                                                                                                                                                                                                                                                                                                                                    |                                                                                                                                                                                                                                                                                                                                                                                                                                                                                                                                                                                                                                                                                                                          |
| EPI_ISL_1540460                                                                                                                                                                                                                                                                                                                                                                                                                                                                                                                                                                                                                                                                                                                                                                                                                                                                                                                                                                                                                                                                                               | Virginia Division of Consolidated Laboratory Services                    | Virginia Division of Consolidated Laboratory Services                                     | Virginia DCLS                                                                                                                                                                                                                                                                                                                                                                                                                                          |                                                                                                                                                                                                                                                                                                                                                                                                                                                                                                                                                                                                                                                                                                                          |
| EPI_ISL_1540737                                                                                                                                                                                                                                                                                                                                                                                                                                                                                                                                                                                                                                                                                                                                                                                                                                                                                                                                                                                                                                                                                               | The Jackson Laboratory                                                   | The Jackson Laboratory                                                                    | Bergeron D, Renzette N, Adams M, Omerza G, Kelly K, Long J, Li L                                                                                                                                                                                                                                                                                                                                                                                       |                                                                                                                                                                                                                                                                                                                                                                                                                                                                                                                                                                                                                                                                                                                          |
| EPI_ISL_1542144, EPI_ISL_1542363, EPI_ISL_1542386, EPI_ISL_1542390, EPI_ISL_1542533, EPI_ISL_1542538, EPI_ISL_1542725, EPI_ISL_1542760, EPI_ISL_1542778, EPI_ISL_1542782, EPI_ISL_1543140, EPI_ISL_1543156, EPI_ISL_1543664, EPI_ISL_1543753, EPI_ISL_1543830                                                                                                                                                                                                                                                                                                                                                                                                                                                                                                                                                                                                                                                                                                                                                                                                                                                 | see above                                                                | Pandemic Response Lab - NYC                                                               | Henry Lee, Michael Hammerling, Melissa Hopkins, Cybill del Castillo, Shinyoung Clair Kang, William Ward, Pradeep Bugga, Sol Rey, Dylan Law, Katharine Nelson, Haiping Hao, Jon Laurent                                                                                                                                                                                                                                                                 |                                                                                                                                                                                                                                                                                                                                                                                                                                                                                                                                                                                                                                                                                                                          |
| EPI_ISL_1547987, EPI_ISL_1548036                                                                                                                                                                                                                                                                                                                                                                                                                                                                                                                                                                                                                                                                                                                                                                                                                                                                                                                                                                                                                                                                              | Johns Hopkins Hospital Department of Pathology                           | Johns Hopkins Hospital Department of Pathology                                            | C. Paul Morris, Chun Huai Luo, Adannaya Amadi, Matthew Schwartz, Heba H. Mostafa                                                                                                                                                                                                                                                                                                                                                                       |                                                                                                                                                                                                                                                                                                                                                                                                                                                                                                                                                                                                                                                                                                                          |
| EPI_ISL_1553195                                                                                                                                                                                                                                                                                                                                                                                                                                                                                                                                                                                                                                                                                                                                                                                                                                                                                                                                                                                                                                                                                               | Illinois Department of Public Health - Springfield Lab                   | Illinois Department of Public Health - Springfield Lab                                    | Bryan Sim, Gordon McCall                                                                                                                                                                                                                                                                                                                                                                                                                               |                                                                                                                                                                                                                                                                                                                                                                                                                                                                                                                                                                                                                                                                                                                          |
| EPI_ISL_1558789                                                                                                                                                                                                                                                                                                                                                                                                                                                                                                                                                                                                                                                                                                                                                                                                                                                                                                                                                                                                                                                                                               | Pathology and Laboratory Medicine Institute, Cleveland Clinic, Ohio, USA | Pathology and Laboratory Medicine Institute, Cleveland Clinic, Ohio, USA                  | Joy Nakitandwe, Zheng Jin Tu, Jay Brock, Yu-Wei Cheng, Gary Procop, Daniel Rhoads, Daniel H. Farkas, David Bosler                                                                                                                                                                                                                                                                                                                                      |                                                                                                                                                                                                                                                                                                                                                                                                                                                                                                                                                                                                                                                                                                                          |
| EPI_ISL_1559127                                                                                                                                                                                                                                                                                                                                                                                                                                                                                                                                                                                                                                                                                                                                                                                                                                                                                                                                                                                                                                                                                               | Public Health Ontario Laboratory                                         | Public Health Ontario Laboratory                                                          | Vanessa G Allen, Philip Banh, Yao Chen, Richard de Borja, Alireza Eshaghi, Nahuel Fittipaldi, Christine Frantz, Jonathan B Gubbay, Jennifer L Guthrie, Lawrence Heisler, Esha Joshi, Michael Laszloffy, Aimin Li, Michael CY Li, Dean Maxwell, Sandeep Nagra, Samir N Patel, Jared Simpson, Karthikeyan Sivaraman, Ashleigh Sullivan, Yogi Sundaravadanam, Sarah Teatero, Andre Villegas, Matthew Watson, Sandra Zittermann                            |                                                                                                                                                                                                                                                                                                                                                                                                                                                                                                                                                                                                                                                                                                                          |
| EPI_ISL_1559501, EPI_ISL_1559564, EPI_ISL_1559578                                                                                                                                                                                                                                                                                                                                                                                                                                                                                                                                                                                                                                                                                                                                                                                                                                                                                                                                                                                                                                                             | Quest Diagnostics Incorporated                                           | Centers for Disease Control and Prevention Division of Viral Diseases, Pathogen Discovery | Dakota Howard, Dhvani Batra, Peter W. Cook, Kara Moser, Adrian Paskey, Jason Caravas, Benjamin Rambo-Martin, Shatavia Morrison, Christopher Gulvick, Scott Sammons, Yvette Unoarumhi, Darlene Wagner, Matthew Schmerer, S. H. Rosenthal, A. Gerasimova, R. M. Kagan, B. Anderson, M. Hua, Y. Liu, L.E. Bernstein, K.E. Livingston, A. Perez, I. A. Shlyakhter, R. V. Rolando, R. Owen, P. Tanpaiboon, F. Lacbawan, Clinton R. Paden, Duncan MacCannell |                                                                                                                                                                                                                                                                                                                                                                                                                                                                                                                                                                                                                                                                                                                          |
| EPI_ISL_1559653, EPI_ISL_1559801, EPI_ISL_1559924, EPI_ISL_1559926, EPI_ISL_1560049, EPI_ISL_1560077, EPI_ISL_1560256, EPI_ISL_1560257, EPI_ISL_1560259, EPI_ISL_1560316, EPI_ISL_1560354, EPI_ISL_1560368, EPI_ISL_1560370, EPI_ISL_1560412, EPI_ISL_1560413, EPI_ISL_1560468, EPI_ISL_1560532, EPI_ISL_1560638, EPI_ISL_1560658, EPI_ISL_1560703, EPI_ISL_1560704, EPI_ISL_1560722, EPI_ISL_1560764, EPI_ISL_1560790, EPI_ISL_1560832, EPI_ISL_1560870, EPI_ISL_1561218, EPI_ISL_1561228, EPI_ISL_1561230, EPI_ISL_1561321, EPI_ISL_1561740, EPI_ISL_1561883, EPI_ISL_1562114, EPI_ISL_1562243, EPI_ISL_1562248, EPI_ISL_1562258, EPI_ISL_1562264, EPI_ISL_1562280, EPI_ISL_1562403, EPI_ISL_1562487, EPI_ISL_1562497, EPI_ISL_1562568, EPI_ISL_1562583, EPI_ISL_1562584, EPI_ISL_1562585, EPI_ISL_1562635, EPI_ISL_1562646, EPI_ISL_1562695, EPI_ISL_1562797, EPI_ISL_1562878, EPI_ISL_1562901, EPI_ISL_1563084, EPI_ISL_1563114, EPI_ISL_1563133, EPI_ISL_1563134, EPI_ISL_1563166, EPI_ISL_1563244, EPI_ISL_1563357, EPI_ISL_1563404, EPI_ISL_1563406, EPI_ISL_1563546, EPI_ISL_1563580, EPI_ISL_1563592 | see above                                                                | Aegis Sciences Corporation                                                                | Centers for Disease Control and Prevention Division of Viral Diseases, Pathogen Discovery                                                                                                                                                                                                                                                                                                                                                              | Dakota Howard, Dhvani Batra, Peter W. Cook, Kara Moser, Adrian Paskey, Jason Caravas, Benjamin Rambo-Martin, Shatavia Morrison, Christopher Gulvick, Scott Sammons, Yvette Unoarumhi, Darlene Wagner, Matthew Schmerer, Cyndi Clark, Patrick Campbell, Rob Case, Vikramsinha Ghorpade, Holly Houdeshell, Ola Kvalvaag, Dillon Nall, Ethan Sanders, Alec Vest, Shaun Westlund, Matthew Hardison, Clinton R. Paden, Duncan MacCannell                                                                                                                                                                                                                                                                                      |
| EPI_ISL_1566399, EPI_ISL_1566429, EPI_ISL_1566437, EPI_ISL_1566450, EPI_ISL_1566514, EPI_ISL_1566530, EPI_ISL_1566541, EPI_ISL_1566562, EPI_ISL_1566565, EPI_ISL_1566570, EPI_ISL_1566594, EPI_ISL_1566609, EPI_ISL_1566625, EPI_ISL_1566647, EPI_ISL_1566654, EPI_ISL_1568245, EPI_ISL_1568304, EPI_ISL_1568322, EPI_ISL_1568369, EPI_ISL_1568374, EPI_ISL_1568413, EPI_ISL_1568415, EPI_ISL_1568483, EPI_ISL_1568489                                                                                                                                                                                                                                                                                                                                                                                                                                                                                                                                                                                                                                                                                        | see above                                                                | SYNLAB MVZ Weiden                                                                         | Robert Koch Institute                                                                                                                                                                                                                                                                                                                                                                                                                                  | unknown                                                                                                                                                                                                                                                                                                                                                                                                                                                                                                                                                                                                                                                                                                                  |
| EPI_ISL_1568500                                                                                                                                                                                                                                                                                                                                                                                                                                                                                                                                                                                                                                                                                                                                                                                                                                                                                                                                                                                                                                                                                               | Synlab MVZ Augsburg                                                      | SYNLAB MVZ Weiden                                                                         | Robert Koch Institute                                                                                                                                                                                                                                                                                                                                                                                                                                  | unknown                                                                                                                                                                                                                                                                                                                                                                                                                                                                                                                                                                                                                                                                                                                  |
| EPI_ISL_1568503                                                                                                                                                                                                                                                                                                                                                                                                                                                                                                                                                                                                                                                                                                                                                                                                                                                                                                                                                                                                                                                                                               | SYNLAB MVZ Weiden                                                        | SYNLAB MVZ Weiden                                                                         | Robert Koch Institute                                                                                                                                                                                                                                                                                                                                                                                                                                  | unknown                                                                                                                                                                                                                                                                                                                                                                                                                                                                                                                                                                                                                                                                                                                  |
| EPI_ISL_1569738                                                                                                                                                                                                                                                                                                                                                                                                                                                                                                                                                                                                                                                                                                                                                                                                                                                                                                                                                                                                                                                                                               | Uniklinikum Regensburg; Institut für klinische Mikrobiologie und Hygiene | Uniklinikum Regensburg; Institut für klinische Mikrobiologie und Hygiene                  | Robert Koch Institute                                                                                                                                                                                                                                                                                                                                                                                                                                  | unknown                                                                                                                                                                                                                                                                                                                                                                                                                                                                                                                                                                                                                                                                                                                  |
| EPI_ISL_1571301, EPI_ISL_1571303, EPI_ISL_1571306, EPI_ISL_1571310, EPI_ISL_1571321, EPI_ISL_1571335, EPI_ISL_1571384, EPI_ISL_1571431, EPI_ISL_1571436, EPI_ISL_1571444                                                                                                                                                                                                                                                                                                                                                                                                                                                                                                                                                                                                                                                                                                                                                                                                                                                                                                                                      | Eurofins LifeCodexx GmbH                                                 | Eurofins LifeCodexx GmbH                                                                  | Robert Koch Institute                                                                                                                                                                                                                                                                                                                                                                                                                                  | unknown                                                                                                                                                                                                                                                                                                                                                                                                                                                                                                                                                                                                                                                                                                                  |
| EPI_ISL_1573100, EPI_ISL_1573107, EPI_ISL_1574446, EPI_ISL_1574469, EPI_ISL_1574483, EPI_ISL_1574556, EPI_ISL_1574572, EPI_ISL_1574664                                                                                                                                                                                                                                                                                                                                                                                                                                                                                                                                                                                                                                                                                                                                                                                                                                                                                                                                                                        | SYNLAB MVZ Weiden                                                        | SYNLAB MVZ Weiden                                                                         | Robert Koch Institute                                                                                                                                                                                                                                                                                                                                                                                                                                  | unknown                                                                                                                                                                                                                                                                                                                                                                                                                                                                                                                                                                                                                                                                                                                  |
| EPI_ISL_1575171                                                                                                                                                                                                                                                                                                                                                                                                                                                                                                                                                                                                                                                                                                                                                                                                                                                                                                                                                                                                                                                                                               | MD PHL                                                                   | MD PHL                                                                                    | Maryland Department of Health Laboratories Administration                                                                                                                                                                                                                                                                                                                                                                                              |                                                                                                                                                                                                                                                                                                                                                                                                                                                                                                                                                                                                                                                                                                                          |
| EPI_ISL_1575202                                                                                                                                                                                                                                                                                                                                                                                                                                                                                                                                                                                                                                                                                                                                                                                                                                                                                                                                                                                                                                                                                               | University of Texas, Genomic Sequencing and Analysis Facility            | University of Texas, Genomic Sequencing and Analysis Facility                             | Jessica Podnar, Sylvie Beaudenon, Audrey Kelly, Zachary Carver, Anna Battenhouse, Andreas Matouschek                                                                                                                                                                                                                                                                                                                                                   |                                                                                                                                                                                                                                                                                                                                                                                                                                                                                                                                                                                                                                                                                                                          |
| EPI_ISL_1575327                                                                                                                                                                                                                                                                                                                                                                                                                                                                                                                                                                                                                                                                                                                                                                                                                                                                                                                                                                                                                                                                                               | Pathology and Laboratory Medicine Institute, Cleveland Clinic, Ohio, USA | Pathology and Laboratory Medicine Institute, Cleveland Clinic, Ohio, USA                  | Joy Nakitandwe, Zheng Jin Tu, Jay Brock, Yu-Wei Cheng, Gary Procop, Daniel Rhoads, Daniel H. Farkas, David Bosler                                                                                                                                                                                                                                                                                                                                      |                                                                                                                                                                                                                                                                                                                                                                                                                                                                                                                                                                                                                                                                                                                          |
| EPI_ISL_1575487, EPI_ISL_1575555, EPI_ISL_1575703, EPI_ISL_1575867, EPI_ISL_1575896, EPI_ISL_1575937, EPI_ISL_1576107, EPI_ISL_1576166, EPI_ISL_1576202, EPI_ISL_1576215, EPI_ISL_1576248, EPI_ISL_1576255, EPI_ISL_1576257, EPI_ISL_1576392, EPI_ISL_1576503, EPI_ISL_1576515, EPI_ISL_1576518, EPI_ISL_1576556, EPI_ISL_1576688                                                                                                                                                                                                                                                                                                                                                                                                                                                                                                                                                                                                                                                                                                                                                                             | see above                                                                | Helix/Illumina                                                                            | Centers for Disease Control and Prevention Division of Viral Diseases, Pathogen Discovery                                                                                                                                                                                                                                                                                                                                                              | Dakota Howard, Dhvani Batra, Peter W. Cook, Kara Moser, Adrian Paskey, Jason Caravas, Benjamin Rambo-Martin, Shatavia Morrison, Christopher Gulvick, Scott Sammons, Yvette Unoarumhi, Darlene Wagner, Matthew Schmerer, Eileen de Feo, Jan Antico, Christine Tran, Matthew Tolentino, Shannon Wickline, Kim Gietzen, Brad Sickler, Jingtao Liu, Eric Allen, Phil Febbo, Nicole L. Washington, Sherry White, Geraint Levan, Kelly Schiabor Barrett, Elizabeth Cirulli, Alexandre Bolze, Ary Ascencio, Charlotte Rivera-Garcia, Ryan Cho, Jason Nguyen, Simon White, Jimmy Ramirez, Tyler Cassens, Efrén Sandoval, Magnus Isaksson, William Lee, David Becker, Marc Laurent, James Lu, Clinton R. Paden, Duncan MacCannell |
| EPI_ISL_1576837, EPI_ISL_1576841, EPI_ISL_1576842, EPI_ISL_1576843, EPI_ISL_1576844, EPI_ISL_1576845, EPI_ISL_1576846, EPI_ISL_1576847, EPI_ISL_1576848, EPI_ISL_1576849, EPI_ISL_1576850                                                                                                                                                                                                                                                                                                                                                                                                                                                                                                                                                                                                                                                                                                                                                                                                                                                                                                                     | see above                                                                | Houston Health Dept.                                                                      | Houston Health Dept.                                                                                                                                                                                                                                                                                                                                                                                                                                   | Ryker Penn, Pamela Brown, Adolpho Lara, Yanlai Lai                                                                                                                                                                                                                                                                                                                                                                                                                                                                                                                                                                                                                                                                       |
| EPI_ISL_1578114, EPI_ISL_1578115                                                                                                                                                                                                                                                                                                                                                                                                                                                                                                                                                                                                                                                                                                                                                                                                                                                                                                                                                                                                                                                                              | Genome Analysis Center, Yamanashi Central Hospital                       | Genome Analysis Center, Yamanashi Central Hospital                                        | Yosuke Hirotsu                                                                                                                                                                                                                                                                                                                                                                                                                                         |                                                                                                                                                                                                                                                                                                                                                                                                                                                                                                                                                                                                                                                                                                                          |
| EPI_ISL_1578149, EPI_ISL_1578164, EPI_ISL_1578189, EPI_ISL_1578193, EPI_ISL_1578209                                                                                                                                                                                                                                                                                                                                                                                                                                                                                                                                                                                                                                                                                                                                                                                                                                                                                                                                                                                                                           | Broad Institute Clinical Research Sequencing Platform                    | Infectious Disease Program, Broad Institute of Harvard and MIT                            | Siddle,K.J., Adams,G., Pearlman,L., Gladden-Young,A., Vicente,G., Blumenstiel,B., DeFelice,M., Lee,M., McGovern,S., Lagerborg,K., Rudy,M., DeRuff,K., Carter,A., Normandin,E., Bauer,M., Reilly,S., Tomkins-Tinch,C., Loreth,C., Chaluvadi,S., Meldrim,J., Granger,B., Lemieux,J.E., Birren,B.W., Sabeti,P.C., Larkin,K., Dodge,S., Lennon,N., Madoff,L., Brown,C., Gallagher,G., Smole,S., Park,D.J., Gabriel,S., and MacInnis,B.L.                   |                                                                                                                                                                                                                                                                                                                                                                                                                                                                                                                                                                                                                                                                                                                          |
| EPI_ISL_1578214, EPI_ISL_1578337                                                                                                                                                                                                                                                                                                                                                                                                                                                                                                                                                                                                                                                                                                                                                                                                                                                                                                                                                                                                                                                                              | Rhode Island Department of Health                                        | Infectious Disease Program, Broad Institute of Harvard and MIT                            | Siddle,K.J., Azevedo,K., Miller,A., Adams,G., Pearlman,L., Gladden-Young,A., Lagerborg,K., Rudy,M., DeRuff,K., Carter,A., Normandin,E., Bauer,M., Reilly,S., Tomkins-Tinch,C., Loreth,C., Chaluvadi,S., Lemieux,J.E., Birren,B.W., Sabeti,P.C., Huard,R., King,E., Park,D.J., and MacInnis,B.L.                                                                                                                                                        |                                                                                                                                                                                                                                                                                                                                                                                                                                                                                                                                                                                                                                                                                                                          |
| EPI_ISL_1578411, EPI_ISL_1578412, EPI_ISL_1578413                                                                                                                                                                                                                                                                                                                                                                                                                                                                                                                                                                                                                                                                                                                                                                                                                                                                                                                                                                                                                                                             | Broad Institute Clinical Research Sequencing Platform                    | Infectious Disease Program, Broad Institute of Harvard and MIT                            | Siddle,K.J., Adams,G., Pearlman,L., Gladden-Young,A., Vicente,G., Blumenstiel,B., DeFelice,M., Lee,M., McGovern,S., Lagerborg,K., Rudy,M., DeRuff,K., Carter,A., Normandin,E., Bauer,M., Reilly,S., Tomkins-Tinch,C., Loreth,C., Chaluvadi,S., Meldrim,J., Granger,B., Lemieux,J.E., Birren,B.W., Sabeti,P.C., Larkin,K., Dodge,S., Lennon,N., Madoff,L., Brown,C., Gallagher,G., Smole,S., Park,D.J., Gabriel,S., and MacInnis,B.L.                   |                                                                                                                                                                                                                                                                                                                                                                                                                                                                                                                                                                                                                                                                                                                          |
| EPI_ISL_1578414                                                                                                                                                                                                                                                                                                                                                                                                                                                                                                                                                                                                                                                                                                                                                                                                                                                                                                                                                                                                                                                                                               | Rhode Island Department of Health                                        | Infectious Disease Program, Broad Institute of Harvard and MIT                            | Siddle,K.J., Azevedo,K., Miller,A., Adams,G., Pearlman,L., Gladden-Young,A., Lagerborg,K., Rudy,M., DeRuff,K., Carter,A., Normandin,E., Bauer,M., Reilly,S., Tomkins-Tinch,C., Loreth,C., Chaluvadi,S., Lemieux,J.E., Birren,B.W., Sabeti,P.C., Huard,R., King,E., Park,D.J., and MacInnis,B.L.                                                                                                                                                        |                                                                                                                                                                                                                                                                                                                                                                                                                                                                                                                                                                                                                                                                                                                          |
| EPI_ISL_1580358, EPI_ISL_1580361, EPI_ISL_1580362, EPI_ISL_1580368, EPI_ISL_1580409, EPI_ISL_1580436, EPI_ISL_1580437, EPI_ISL_1580439, EPI_ISL_1580442, EPI_ISL_1580446                                                                                                                                                                                                                                                                                                                                                                                                                                                                                                                                                                                                                                                                                                                                                                                                                                                                                                                                      | University of Michigan Clinical Microbiology Laboratory                  | Lauring Lab, University of Michigan, Department of Microbiology and Immunology            | Valesano                                                                                                                                                                                                                                                                                                                                                                                                                                               |                                                                                                                                                                                                                                                                                                                                                                                                                                                                                                                                                                                                                                                                                                                          |

|                                                                                                                                                                                                                                                                                                                                                    |           |                                                                                             |                                                                                                                    |                                                                                                                                                                                                                                                                                                                                                                                                                                                                                                                                                                                                                                                                                                                                                                    |
|----------------------------------------------------------------------------------------------------------------------------------------------------------------------------------------------------------------------------------------------------------------------------------------------------------------------------------------------------|-----------|---------------------------------------------------------------------------------------------|--------------------------------------------------------------------------------------------------------------------|--------------------------------------------------------------------------------------------------------------------------------------------------------------------------------------------------------------------------------------------------------------------------------------------------------------------------------------------------------------------------------------------------------------------------------------------------------------------------------------------------------------------------------------------------------------------------------------------------------------------------------------------------------------------------------------------------------------------------------------------------------------------|
| EPI_ISL_1580743, EPI_ISL_1580791, EPI_ISL_1580968, EPI_ISL_1581135, EPI_ISL_1581145, EPI_ISL_1581161, EPI_ISL_1581266, EPI_ISL_1581315, EPI_ISL_1581451, EPI_ISL_1581578, EPI_ISL_1581743, EPI_ISL_1581792                                                                                                                                         | see above | Helix/Illumina                                                                              | Centers for Disease Control and Prevention Division of Viral Diseases, Pathogen Discovery                          | Dakota Howard, Dhvani Batra, Peter W. Cook, Kara Moser, Adrian Paskey, Jason Caravas, Benjamin Rambo-Martin, Shatavia Morrison, Christopher Gulvick, Scott Sammons, Yvette Unoarumhi, Darlene Wagner, Matthew Schmeier, Eileen de Feo, Jan Antico, Christine Tran, Matthew Tolentino, Shannon Wickline, Kim Gietzen, Brad Sickler, Jingtao Liu, Eric Allen, Phil Febbo, Nicole L. Washington, Simon White, Geraint Levan, Kelly Schiabor Barrett, Elizabeth Cirulli, Alexandre Bolze, Ary Ascencio, Charlotte Rivera-Garcia, Ryan Cho, Jason Nguyen, Sherry Wang, Jimmy Ramirez, Tyler Cassens, Efrén Sandoval, Magnus Isaksson, William Lee, David Becker, Marc Laurent, James Lu, Clinton R. Paden, Duncan MacCannell                                            |
| EPI_ISL_1581911, EPI_ISL_1582055, EPI_ISL_1582056, EPI_ISL_1582147                                                                                                                                                                                                                                                                                 |           | Quest Diagnostics Incorporated                                                              | Centers for Disease Control and Prevention Division of Viral Diseases, Pathogen Discovery                          | Dakota Howard, Dhvani Batra, Peter W. Cook, Kara Moser, Adrian Paskey, Jason Caravas, Benjamin Rambo-Martin, Shatavia Morrison, Christopher Gulvick, Scott Sammons, Yvette Unoarumhi, Darlene Wagner, Matthew Schmeier, S. H. Rosenthal, A. Gerasimova, R. M. Kagan, B. Anderson, M. Hua, Y. Liu, L.E. Bernstein, K.E. Livingston, A. Perez, I. A. Shlyakhter, R. V. Rolando, R. Owen, P. Tanpaiboon, F. Lacbawan, Clinton R. Paden, Duncan MacCannell                                                                                                                                                                                                                                                                                                             |
| EPI_ISL_1582341, EPI_ISL_1582343, EPI_ISL_1582344                                                                                                                                                                                                                                                                                                  |           | URMC LABS                                                                                   | Wadsworth Center, New York State Department of Health                                                              | Kirsten St. George, Daryl M. Lamson, Alexis Russell, Matthew Shudt, Melissa A Leisner, Jonathan Plitnick, Catharine Prussing, Navjot Singh, John Kelly, Erasmus Schneider, Erica Lasek-Nesselquist                                                                                                                                                                                                                                                                                                                                                                                                                                                                                                                                                                 |
| EPI_ISL_1582627                                                                                                                                                                                                                                                                                                                                    |           | University of Wisconsin-Madison AIDS Vaccine Research Laboratories                          | University of Wisconsin-Madison AIDS Vaccine Research Laboratories                                                 | Gage Moreno, Katarina Braun, et al. AIDS Vaccine Research Laboratories                                                                                                                                                                                                                                                                                                                                                                                                                                                                                                                                                                                                                                                                                             |
| EPI_ISL_1582765                                                                                                                                                                                                                                                                                                                                    |           | Wyoming Public Health Laboratory                                                            | Wyoming Public Health Laboratory                                                                                   | Jim Mildenerger, Wanda Manley, Noah Hull, Taylor Fearing, Lynette Gumbleton, Channing Weber, Ashley Norberg, Chayse Rowley, Marley Goetz, Brian Dominguez, Elliot Thomasson, Cari Sloma, and Rob Christensen                                                                                                                                                                                                                                                                                                                                                                                                                                                                                                                                                       |
| EPI_ISL_1583295                                                                                                                                                                                                                                                                                                                                    |           | Klinikum Wels-Grieskirchen                                                                  | Bergthaler laboratory, CeMM Research Center for Molecular Medicine of the Austrian Academy of Sciences             | Lukas Endler, Anna Schedl, Fabian Amman, Petr Triska, Thomas Penz, Benedikt Agerer, Maelle Le Moing, Michael Schuster, Bekir Erguner, Jan Laine, Martin Senekowitsch, Christoph Bock, Andreas Bergthaler                                                                                                                                                                                                                                                                                                                                                                                                                                                                                                                                                           |
| EPI_ISL_1583368, EPI_ISL_1583370, EPI_ISL_1583380, EPI_ISL_1583389, EPI_ISL_1583398                                                                                                                                                                                                                                                                |           | Austrian Agency for Health and Food Safety (AGES)                                           | Bergthaler laboratory, CeMM Research Center for Molecular Medicine of the Austrian Academy of Sciences             | Lukas Endler, Anna Schedl, Fabian Amman, Petr Triska, Thomas Penz, Benedikt Agerer, Maelle Le Moing, Michael Schuster, Bekir Erguner, Jan Laine, Martin Senekowitsch, Christoph Bock, Andreas Bergthaler                                                                                                                                                                                                                                                                                                                                                                                                                                                                                                                                                           |
| EPI_ISL_1587026                                                                                                                                                                                                                                                                                                                                    |           | Altius Institute                                                                            | Seattle Flu Study                                                                                                  | Deborah A. Nickerson, Chris D. Frazier, Jover Lee, Benjamin Pelle, Erica Ryke, Matthew Richardson, Amanda Adler, Elisabeth Brandstetter, Peter D. Han, Kairsten Fay, Misja Ilicsin, Kirsten Lacombe, Thomas R. Sibley, Melissa Truong, Caitlin R. Wolf, Ryan Alexander, Daniel Bates, Rebecca Bruders, Stephanie DeBaun, Clem Green, Muhammad Halimun, Jessica Halow, Kneshay Harper, Matt Hartman, Andrew Meuser, Alex Nguyen, Truong Nguyen, Sofia Olsson, Sadie Patraw, Hannah Petersen, Tobias Ragoczy, Joshua Richards, Jacob Rodriguez, John Stamatoyannopoulos, Julia Wald, Olivia Waltner, Michael Boeckh, Janet A. Englund, Michael Famulare, Barry R. Lutz, Mark J. Rieder, Lea M. Starita, Matthew Thompson, Helen Y. Chu, Jay Shendure, Trevor Bedford |
| EPI_ISL_1587281, EPI_ISL_1587313, EPI_ISL_1587365                                                                                                                                                                                                                                                                                                  |           | Yale Clinical Virology Lab                                                                  | Grubaugh Lab - Yale School of Public Health                                                                        | Joseph Fauver, Mallory Breban, Isabel Ott, Tara Alpert, Mary Petrone, Anderson Brito, Chantal Vogels, Annie Watkins, Chaney Kalinich, Jessica Rothman, Marie L. Landry, Nathan Grubaugh                                                                                                                                                                                                                                                                                                                                                                                                                                                                                                                                                                            |
| EPI_ISL_1587580, EPI_ISL_1587581, EPI_ISL_1587582                                                                                                                                                                                                                                                                                                  |           | Genome Analysis Center, Yamanashi Central Hospital                                          | Genome Analysis Center, Yamanashi Central Hospital                                                                 | Yosuke Hirotsu                                                                                                                                                                                                                                                                                                                                                                                                                                                                                                                                                                                                                                                                                                                                                     |
| EPI_ISL_1587785, EPI_ISL_1588079, EPI_ISL_1588389                                                                                                                                                                                                                                                                                                  |           | Infinity Biologix                                                                           | Centers for Disease Control and Prevention Division of Viral Diseases, Pathogen Discovery                          | Dakota Howard, Dhvani Batra, Peter W. Cook, Kara Moser, Adrian Paskey, Jason Caravas, Benjamin Rambo-Martin, Shatavia Morrison, Christopher Gulvick, Scott Sammons, Yvette Unoarumhi, Darlene Wagner, Matthew Schmeier, Christian Bixby, Yihe Wang, Jonathan Schultz, Chirayu Goswami, Russ Hager, Robin Grimwood, Clinton R. Paden, Duncan MacCannell                                                                                                                                                                                                                                                                                                                                                                                                             |
| EPI_ISL_1591250, EPI_ISL_1591265                                                                                                                                                                                                                                                                                                                   |           | Caribbean Public Health Agency                                                              | Carrington Lab, Department of PreClinical Sciences, Faculty of Medical Sciences, The University of the West Indies | Nikita S. D. Sahadeo, Arianne Brown-Jordan, Sarah Hill, Vernie Ramkissoon, Roshan Parasram, Naresh Nandram, Avery Hinds, Jerome Foster, Stanley Giddings, Karla Georges, Marsha Ivey, Rahul Naidu, Risha Singh, SueMin Nathaniel, Rajini Haraksingh, Jaya Jayaraman, Chinna Chinnadurai, Adesh Ramsubhag, Nuno Faria, Oliver Pybus, Christopher Oura, Gabriel Escobar, Christine V. F. Carrington                                                                                                                                                                                                                                                                                                                                                                  |
| EPI_ISL_1591350                                                                                                                                                                                                                                                                                                                                    |           | Institute for Public Health of Zagreb County                                                | Croatian Institute of Public Health                                                                                | Irena Tabain, Ivana Ferenak                                                                                                                                                                                                                                                                                                                                                                                                                                                                                                                                                                                                                                                                                                                                        |
| EPI_ISL_1591351, EPI_ISL_1591457, EPI_ISL_1591458, EPI_ISL_1591459, EPI_ISL_1591518, EPI_ISL_1591719                                                                                                                                                                                                                                               |           | Caribbean Public Health Agency                                                              | Carrington Lab, Department of PreClinical Sciences, Faculty of Medical Sciences, The University of the West Indies | Nikita S. D. Sahadeo, Arianne Brown-Jordan, Sarah Hill, Vernie Ramkissoon, Roshan Parasram, Naresh Nandram, Avery Hinds, Jerome Foster, Stanley Giddings, Karla Georges, Marsha Ivey, Rahul Naidu, Risha Singh, SueMin Nathaniel, Rajini Haraksingh, Jaya Jayaraman, Chinna Chinnadurai, Adesh Ramsubhag, Nuno Faria, Oliver Pybus, Christopher Oura, Gabriel Escobar, Christine V. F. Carrington                                                                                                                                                                                                                                                                                                                                                                  |
| EPI_ISL_1591720                                                                                                                                                                                                                                                                                                                                    |           | Caribbean Public Health Laboratory                                                          | Carrington Lab, Department of PreClinical Sciences, Faculty of Medical Sciences, The University of the West Indies | Nikita S. D. Sahadeo, Arianne Brown-Jordan, Sarah Hill, Vernie Ramkissoon, Roshan Parasram, Naresh Nandram, Avery Hinds, Jerome Foster, Stanley Giddings, Karla Georges, Marsha Ivey, Rahul Naidu, Risha Singh, SueMin Nathaniel, Rajini Haraksingh, Jaya Jayaraman, Chinna Chinnadurai, Adesh Ramsubhag, Nuno Faria, Oliver Pybus, Christopher Oura, Gabriel Escobar, Christine V. F. Carrington                                                                                                                                                                                                                                                                                                                                                                  |
| EPI_ISL_1591721, EPI_ISL_1591722                                                                                                                                                                                                                                                                                                                   |           | Caribbean Public Health Agency                                                              | Carrington Lab, Department of PreClinical Sciences, Faculty of Medical Sciences, The University of the West Indies | Nikita S. D. Sahadeo, Arianne Brown-Jordan, Sarah Hill, Vernie Ramkissoon, Roshan Parasram, Naresh Nandram, Avery Hinds, Jerome Foster, Stanley Giddings, Karla Georges, Marsha Ivey, Rahul Naidu, Risha Singh, SueMin Nathaniel, Rajini Haraksingh, Jaya Jayaraman, Chinna Chinnadurai, Adesh Ramsubhag, Nuno Faria, Oliver Pybus, Christopher Oura, Gabriel Escobar, Christine V. F. Carrington                                                                                                                                                                                                                                                                                                                                                                  |
| EPI_ISL_1592545, EPI_ISL_1592600, EPI_ISL_1592643, EPI_ISL_1592708, EPI_ISL_1592918, EPI_ISL_1593077                                                                                                                                                                                                                                               |           | Helix/Illumina                                                                              | Centers for Disease Control and Prevention Division of Viral Diseases, Pathogen Discovery                          | Dakota Howard, Dhvani Batra, Peter W. Cook, Kara Moser, Adrian Paskey, Jason Caravas, Benjamin Rambo-Martin, Shatavia Morrison, Christopher Gulvick, Scott Sammons, Yvette Unoarumhi, Darlene Wagner, Matthew Schmeier, Eileen de Feo, Jan Antico, Christine Tran, Matthew Tolentino, Shannon Wickline, Kim Gietzen, Brad Sickler, Jingtao Liu, Eric Allen, Phil Febbo, Nicole L. Washington, Simon White, Geraint Levan, Kelly Schiabor Barrett, Elizabeth Cirulli, Alexandre Bolze, Ary Ascencio, Charlotte Rivera-Garcia, Ryan Cho, Jason Nguyen, Sherry Wang, Jimmy Ramirez, Tyler Cassens, Efrén Sandoval, Magnus Isaksson, William Lee, David Becker, Marc Laurent, James Lu, Clinton R. Paden, Duncan MacCannell                                            |
| EPI_ISL_1593731                                                                                                                                                                                                                                                                                                                                    |           | DOHMH PHL                                                                                   | New York City Public Health Laboratory                                                                             | Jade Wang, et al.                                                                                                                                                                                                                                                                                                                                                                                                                                                                                                                                                                                                                                                                                                                                                  |
| EPI_ISL_1593769                                                                                                                                                                                                                                                                                                                                    |           | DOHMH Crown Heights                                                                         | New York City Public Health Laboratory                                                                             | Jade Wang, et al.                                                                                                                                                                                                                                                                                                                                                                                                                                                                                                                                                                                                                                                                                                                                                  |
| EPI_ISL_1593893                                                                                                                                                                                                                                                                                                                                    |           | Arizona State Public Health Laboratory                                                      | Arizona State Public Health Laboratory                                                                             | Trung Huynh, Jessica Escobar, Katherine Fullerton, Nobuko Fukushima, Stacy White, Linda Getsinger, Victor Waddell                                                                                                                                                                                                                                                                                                                                                                                                                                                                                                                                                                                                                                                  |
| EPI_ISL_1595589                                                                                                                                                                                                                                                                                                                                    |           | Illinois Department of Public Health - Springfield Lab                                      | Illinois Department of Public Health - Springfield Lab                                                             | Bryan Sim, Gordon McCall                                                                                                                                                                                                                                                                                                                                                                                                                                                                                                                                                                                                                                                                                                                                           |
| EPI_ISL_1595846, EPI_ISL_1595847, EPI_ISL_1595848, EPI_ISL_1595850                                                                                                                                                                                                                                                                                 |           | Genome Analysis Center, Yamanashi Central Hospital                                          | Genome Analysis Center, Yamanashi Central Hospital                                                                 | Yosuke Hirotsu                                                                                                                                                                                                                                                                                                                                                                                                                                                                                                                                                                                                                                                                                                                                                     |
| EPI_ISL_1596003, EPI_ISL_1596918, EPI_ISL_1596940                                                                                                                                                                                                                                                                                                  |           | Dutch COVID-19 response team                                                                | National Institute for Public Health and the Environment (RIVM)                                                    | Adam Meijer, Harry Vennema, Dirk Eggink, Jeroen Cremer, Sharon van den Brink, Bas van der Veer, AnneMarie van den Brandt, Lisa Wijsman, Kim Freeriks, Ryanne Jaarsma, Eunice Then, Jolienke Hardeman, Lynn Aarts, Sanne Bos, Melissa van Tuil, Robert Kohl, Linda van de Nes, Sjoerd Kuling, James Groot, Florian Zwagemaker, Dennis Schmitz, Annelies Kroneman, Karim Hajji, Chantal Reusken, on behalf of the national COVID-19 response team                                                                                                                                                                                                                                                                                                                    |
| EPI_ISL_1599372                                                                                                                                                                                                                                                                                                                                    |           | Salzkammergutklinikum Vöcklabruck, Institut für Pathologie                                  | Salzkammergutklinikum Vöcklabruck, Institut für Pathologie                                                         | Regina Stitz, Penka Lechner, Senka Rohregger, René Silye                                                                                                                                                                                                                                                                                                                                                                                                                                                                                                                                                                                                                                                                                                           |
| EPI_ISL_1601445                                                                                                                                                                                                                                                                                                                                    |           | UW Virology Lab                                                                             | UW Virology Lab                                                                                                    | Pavitra Roychoudhury, Hong Xie, Lasata Shrestha, Shah Mohamed Bakhsh, Michelle Lin, Noah R. Baker, Sean Ellis, Saraswathi Sathees, Meei-Li Huang, Keith R. Jerome, Alexander Greninger                                                                                                                                                                                                                                                                                                                                                                                                                                                                                                                                                                             |
| EPI_ISL_1602420, EPI_ISL_1602421                                                                                                                                                                                                                                                                                                                   |           | Swedish national genomic surveillance program of SARS-CoV-2                                 | The Public Health Agency of Sweden                                                                                 | Swedish national genomic surveillance program of SARS-CoV-2                                                                                                                                                                                                                                                                                                                                                                                                                                                                                                                                                                                                                                                                                                        |
| EPI_ISL_1608582, EPI_ISL_1608588, EPI_ISL_1608589, EPI_ISL_1608590, EPI_ISL_1608591, EPI_ISL_1608593, EPI_ISL_1608594, EPI_ISL_1608595, EPI_ISL_1608598, EPI_ISL_1608599, EPI_ISL_1608605, EPI_ISL_1608625, EPI_ISL_1608636, EPI_ISL_1608647, EPI_ISL_1608653, EPI_ISL_1608731, EPI_ISL_1608742                                                    | see above | Maryland Genomics, Institute for Genome Sciences, University of Maryland School of Medicine | Maryland Genomics, Institute for Genome Sciences, University of Maryland School of Medicine                        | Tallon, Luke J; Sadzewicz, Lisa D; Humphrys, Mike; Ott, Sandra; Roussey, Holly; Mehta, Aditya; Vavikolanu, Kranthi; Fraser, Claire M; Ravel, Jacques                                                                                                                                                                                                                                                                                                                                                                                                                                                                                                                                                                                                               |
| EPI_ISL_1608874, EPI_ISL_1609190, EPI_ISL_1609462, EPI_ISL_1609470, EPI_ISL_1609535, EPI_ISL_1609874, EPI_ISL_1610008, EPI_ISL_1610344, EPI_ISL_1610660, EPI_ISL_1610676, EPI_ISL_1610790, EPI_ISL_1610901, EPI_ISL_1610916, EPI_ISL_1611038, EPI_ISL_1611086, EPI_ISL_1611532, EPI_ISL_1611738, EPI_ISL_1612000, EPI_ISL_1612534, EPI_ISL_1612629 |           |                                                                                             |                                                                                                                    |                                                                                                                                                                                                                                                                                                                                                                                                                                                                                                                                                                                                                                                                                                                                                                    |

|                                                                                                                                                                                                                                                               |                                                                                                 |                                                                                           |                                                                                                                                                                                                                                                                                                                                                                                                                                                                                                                                                                                                                                                                                                                                                                                                                                                                                                                                                                                                                                                  |
|---------------------------------------------------------------------------------------------------------------------------------------------------------------------------------------------------------------------------------------------------------------|-------------------------------------------------------------------------------------------------|-------------------------------------------------------------------------------------------|--------------------------------------------------------------------------------------------------------------------------------------------------------------------------------------------------------------------------------------------------------------------------------------------------------------------------------------------------------------------------------------------------------------------------------------------------------------------------------------------------------------------------------------------------------------------------------------------------------------------------------------------------------------------------------------------------------------------------------------------------------------------------------------------------------------------------------------------------------------------------------------------------------------------------------------------------------------------------------------------------------------------------------------------------|
| see above                                                                                                                                                                                                                                                     | Laboratory Corporation of America                                                               | Centers for Disease Control and Prevention Division of Viral Diseases, Pathogen Discovery | Dakota Howard, Dhvani Batra, Peter W. Cook, Kara Moser, Adrian Paskey, Jason Caravas, Benjamin Rambo-Martin, Shatavia Morrison, Christopher Gulvick, Scott Sammons, Yvette Unoarumhi, Darlene Wagner, Matthew Schmeurer, Minoo Agarwal, Eyad Almasri, Debbie Boles, Ayla Burns, Nuthawin Charoensri, Oren Cohen, Susan Countryman, Mary Ann Cristobal, Bobbi Croy, Suzanne Dale, Hrushikesh Deshmukh, Amanda Douglas, Vincent Drouillon, Marcia Eisenberg, Howard Engler, Rama Ghatti, Prashant Gupta, Susan Hicks, Jake Humphrey, Lax Iyer, Manoj Jain, Mohan Koli, Brian Krueger, Tim Kuphal, Stanley Letovsky, Michael Levandoski, Craig Lukasik, Jonathan Meltzer, Brian Norvell, Mindy Nye, Scott Parker, Christos Petropoulos, John Pruitt, Steven Ragan, Scott Ryan, Mike Sapeta, Jana Schroth, Suresh Babu Selvaraju, Goran Stevonic, Amanda Suchanek, Andrea Throop, Lyndon Tilson, Thomas Urban, Joe Voshell, Kimberly Wagner, Jonathan Williams, Mary Williamson, Qian Zeng, Tricia Zwiefelhofer, Clinton R. Paden, Duncan MacCannell |
| EPI_ISL_1612850, EPI_ISL_1613067, EPI_ISL_1614189, EPI_ISL_1614219, EPI_ISL_1614250, EPI_ISL_1614457, EPI_ISL_1614646, EPI_ISL_1614660                                                                                                                        | Fulgent Genetics                                                                                | Centers for Disease Control and Prevention Division of Viral Diseases, Pathogen Discovery | Dakota Howard, Dhvani Batra, Peter W. Cook, Kara Moser, Adrian Paskey, Jason Caravas, Benjamin Rambo-Martin, Shatavia Morrison, Christopher Gulvick, Scott Sammons, Yvette Unoarumhi, Darlene Wagner, Matthew Schmeurer, Harry Gao, Micky Li, John Gao, Joseph Fierro, Benafsh Sapra, Becky Tsai, Yan Meng, Doreen Ng, James Xie, Clinton R. Paden, Duncan MacCannell                                                                                                                                                                                                                                                                                                                                                                                                                                                                                                                                                                                                                                                                            |
| EPI_ISL_1614958, EPI_ISL_1614965, EPI_ISL_1614975, EPI_ISL_1614996                                                                                                                                                                                            | Quest Diagnostics Incorporated                                                                  | Centers for Disease Control and Prevention Division of Viral Diseases, Pathogen Discovery | Dakota Howard, Dhvani Batra, Peter W. Cook, Kara Moser, Adrian Paskey, Jason Caravas, Benjamin Rambo-Martin, Shatavia Morrison, Christopher Gulvick, Scott Sammons, Yvette Unoarumhi, Darlene Wagner, Matthew Schmeurer, S. H. Rosenthal, A. Gerasimova, R. M. Kagan, B. Anderson, M. Hua, Y. Liu, L.E. Bernstein, K.E. Livingston, A. Perez, I. A. Shlyakhter, R. V. Rolando, R. Owen, P. Tanpaiboon, F. Lacbawan, Clinton R. Paden, Duncan MacCannell                                                                                                                                                                                                                                                                                                                                                                                                                                                                                                                                                                                          |
| EPI_ISL_1615092, EPI_ISL_1615185, EPI_ISL_1615195, EPI_ISL_1615395                                                                                                                                                                                            | Helix/Illumina                                                                                  | Centers for Disease Control and Prevention Division of Viral Diseases, Pathogen Discovery | Dakota Howard, Dhvani Batra, Peter W. Cook, Kara Moser, Adrian Paskey, Jason Caravas, Benjamin Rambo-Martin, Shatavia Morrison, Christopher Gulvick, Scott Sammons, Yvette Unoarumhi, Darlene Wagner, Matthew Schmeurer, Eileen de Feo, Jan Antico, Christine Tran, Matthew Tolentino, Shannon Wickline, Kim Gietzen, Brad Sickler, Jingtao Liu, Eric Allen, Phil Febbo, Nicole L. Washington, Simon White, Geraint Levan, Kelly Schiabor Barrett, Elizabeth Cirulli, Alexandre Bolze, Ary Ascencio, Charlotte Rivera-Garcia, Ryan Cho, Jason Nguyen, Sherry Wang, Jimmy Ramirez, Tyler Cassens, Efen Sandoval, Magnus Isaksson, William Lee, David Becker, Marc Laurent, James Lu, Clinton R. Paden, Duncan MacCannell                                                                                                                                                                                                                                                                                                                          |
| EPI_ISL_1616683                                                                                                                                                                                                                                               | UW Virology Lab                                                                                 | UW Virology Lab                                                                           | Pavitra Roychoudhury, Hong Xie, Lasata Shrestha, Shah Mohamed Bakhsh, Michelle Lin, Noah R. Baker, Sean Ellis, Saraswathi Sathees, Meei-Li Huang, Keith R. Jerome, Alexander Greninger                                                                                                                                                                                                                                                                                                                                                                                                                                                                                                                                                                                                                                                                                                                                                                                                                                                           |
| EPI_ISL_1617446, EPI_ISL_1617513, EPI_ISL_1617544, EPI_ISL_1617705, EPI_ISL_1617755, EPI_ISL_1617758, EPI_ISL_1617887, EPI_ISL_1618090, EPI_ISL_1618273, EPI_ISL_1618274, EPI_ISL_1618311, EPI_ISL_1618372, EPI_ISL_1618476, EPI_ISL_1618540                  | Swedish national genomic surveillance program of SARS-CoV-2                                     | The Public Health Agency of Sweden                                                        | Swedish national genomic surveillance program of SARS-CoV-2                                                                                                                                                                                                                                                                                                                                                                                                                                                                                                                                                                                                                                                                                                                                                                                                                                                                                                                                                                                      |
| see above                                                                                                                                                                                                                                                     | Puerto Rico Department of Health                                                                | Centers for Disease Control and Prevention, Dengue Branch                                 | Gilberto A. Santiago, Glenda Gonzalez, Betzabel Flores, Keyla Charriez, Gabriela Paz-Bailey, Jorge L. Munoz-Jordan                                                                                                                                                                                                                                                                                                                                                                                                                                                                                                                                                                                                                                                                                                                                                                                                                                                                                                                               |
| EPI_ISL_1620621                                                                                                                                                                                                                                               | Puerto Rico Department of Health                                                                | Centers for Disease Control and Prevention, Dengue Branch                                 | Gilberto A. Santiago, Glenda Gonzalez, Betzabel Flores, Keyla Charriez, Gabriela Paz-Bailey, Jorge L. Munoz-Jordan                                                                                                                                                                                                                                                                                                                                                                                                                                                                                                                                                                                                                                                                                                                                                                                                                                                                                                                               |
| EPI_ISL_1620658                                                                                                                                                                                                                                               | GA Department of Public Health                                                                  | GA Department of Public Health                                                            | Stacy Reeves, Jonathan Edwards, Cynthia Dixey, Tonia Parrott, Alyah Fields, Taylor Smith                                                                                                                                                                                                                                                                                                                                                                                                                                                                                                                                                                                                                                                                                                                                                                                                                                                                                                                                                         |
| EPI_ISL_1620827                                                                                                                                                                                                                                               | UW Virology Lab                                                                                 | UW Virology Lab                                                                           | Pavitra Roychoudhury, Hong Xie, Lasata Shrestha, Shah Mohamed Bakhsh, Michelle Lin, Noah R. Baker, Sean Ellis, Saraswathi Sathees, Meei-Li Huang, Keith R. Jerome, Alexander Greninger                                                                                                                                                                                                                                                                                                                                                                                                                                                                                                                                                                                                                                                                                                                                                                                                                                                           |
| EPI_ISL_1621405, EPI_ISL_1621406, EPI_ISL_1621407, EPI_ISL_1621408, EPI_ISL_1621410, EPI_ISL_1621411, EPI_ISL_1621412, EPI_ISL_1621413, EPI_ISL_1621414, EPI_ISL_1621415, EPI_ISL_1621416, EPI_ISL_1621417, EPI_ISL_1621418, EPI_ISL_1621419, EPI_ISL_1621420 | Hospital of the University of Pennsylvania Molecular Pathology Lab                              | Bushman Lab - University of Pennsylvania                                                  | John Everett, Kyle Rodino, Shantanu Reddy, Pascha Hokama, Aoife M. Roche, Young Hwang, Abigail Glascock, Scott Sherrill-Mix, Samantha A. Whiteside, Jevon Graham-Wooten, Layla A. Khatib, Ayannah S. Fitzgerald, Arupa Ganguly, Mike Feldman, Brendan Kelly, Ronald G. Collman and Frederic Bushman                                                                                                                                                                                                                                                                                                                                                                                                                                                                                                                                                                                                                                                                                                                                              |
| see above                                                                                                                                                                                                                                                     | Hospital of the University of Pennsylvania Molecular Pathology Lab                              | Bushman Lab - University of Pennsylvania                                                  | John Everett, Kyle Rodino, Shantanu Reddy, Pascha Hokama, Aoife M. Roche, Young Hwang, Abigail Glascock, Scott Sherrill-Mix, Samantha A. Whiteside, Jevon Graham-Wooten, Layla A. Khatib, Ayannah S. Fitzgerald, Arupa Ganguly, Mike Feldman, Brendan Kelly, Ronald G. Collman and Frederic Bushman                                                                                                                                                                                                                                                                                                                                                                                                                                                                                                                                                                                                                                                                                                                                              |
| EPI_ISL_1621888, EPI_ISL_1622011                                                                                                                                                                                                                              | Quest Diagnostics Incorporated                                                                  | Centers for Disease Control and Prevention Division of Viral Diseases, Pathogen Discovery | Dakota Howard, Dhvani Batra, Peter W. Cook, Kara Moser, Adrian Paskey, Jason Caravas, Benjamin Rambo-Martin, Shatavia Morrison, Christopher Gulvick, Scott Sammons, Yvette Unoarumhi, Darlene Wagner, Matthew Schmeurer, S. H. Rosenthal, A. Gerasimova, R. M. Kagan, B. Anderson, M. Hua, Y. Liu, L.E. Bernstein, K.E. Livingston, A. Perez, I. A. Shlyakhter, R. V. Rolando, R. Owen, P. Tanpaiboon, F. Lacbawan, Clinton R. Paden, Duncan MacCannell                                                                                                                                                                                                                                                                                                                                                                                                                                                                                                                                                                                          |
| EPI_ISL_1622536, EPI_ISL_1622677, EPI_ISL_1622725, EPI_ISL_1622727                                                                                                                                                                                            | Servicio de Microbiología Clínica (Complejo Hospitalario de Navarra, Pamplona)                  | Centro de Secuenciación NASERTIC                                                          | Carmen Ezpeleta Baquedano, Ana Navascués, Ana Miqueleiz                                                                                                                                                                                                                                                                                                                                                                                                                                                                                                                                                                                                                                                                                                                                                                                                                                                                                                                                                                                          |
| EPI_ISL_1623807                                                                                                                                                                                                                                               | Baylor Scott & White-Temple                                                                     | Baylor Scott & White-Temple                                                               | Ari Rao, Linden Morales, Kimberly Walker, Marcus Volz, Shelby Hendrickson, Caitlin Maloney                                                                                                                                                                                                                                                                                                                                                                                                                                                                                                                                                                                                                                                                                                                                                                                                                                                                                                                                                       |
| EPI_ISL_1623958                                                                                                                                                                                                                                               | MONTEFIORE MEDICAL CENTER LABORATORIES                                                          | Wadsworth Center, New York State Department of Health                                     | Kirsten St. George, Daryl M. Lamson, Alexis Russell, Matthew Shudt, Melissa A. Leisner, Jonathan Plitnick, Catharine Prussing, Navjot Singh, John Kelly, Erasmus Schneider, Erica Lasek-Nesselquist                                                                                                                                                                                                                                                                                                                                                                                                                                                                                                                                                                                                                                                                                                                                                                                                                                              |
| EPI_ISL_1624108                                                                                                                                                                                                                                               | Illinois Department of Public Health - Springfield Lab                                          | Illinois Department of Public Health - Springfield Lab                                    | Bryan Sim, Gordon McCall                                                                                                                                                                                                                                                                                                                                                                                                                                                                                                                                                                                                                                                                                                                                                                                                                                                                                                                                                                                                                         |
| EPI_ISL_1624226, EPI_ISL_1624230, EPI_ISL_1624231, EPI_ISL_1624232, EPI_ISL_1624233, EPI_ISL_1624234, EPI_ISL_1624235, EPI_ISL_1624236                                                                                                                        | Naval Health Clinic Annapolis                                                                   | Naval Medical Research Center Biological Defense Research Directorate                     | Logan Voegtly, Catherine Arnold, Bishwo Adhikari, Francisco Malagon Bautista, Andrea Luquette, Gregory Rice, Andrew Bennett, Kyle Long, Lindsay Giang, Michael Deschenes, Regina Cer, Kimberly Bishop-Lilly                                                                                                                                                                                                                                                                                                                                                                                                                                                                                                                                                                                                                                                                                                                                                                                                                                      |
| EPI_ISL_1624456                                                                                                                                                                                                                                               | URMC LABS                                                                                       | Wadsworth Center, New York State Department of Health                                     | Kirsten St. George, Daryl M. Lamson, Alexis Russell, Matthew Shudt, Melissa A. Leisner, Jonathan Plitnick, Catharine Prussing, Navjot Singh, John Kelly, Erasmus Schneider, Erica Lasek-Nesselquist                                                                                                                                                                                                                                                                                                                                                                                                                                                                                                                                                                                                                                                                                                                                                                                                                                              |
| EPI_ISL_1624483                                                                                                                                                                                                                                               | SARATOGA HOSPITAL LABORATORY                                                                    | Wadsworth Center, New York State Department of Health                                     | Kirsten St. George, Daryl M. Lamson, Alexis Russell, Matthew Shudt, Melissa A. Leisner, Jonathan Plitnick, Catharine Prussing, Navjot Singh, John Kelly, Erasmus Schneider, Erica Lasek-Nesselquist                                                                                                                                                                                                                                                                                                                                                                                                                                                                                                                                                                                                                                                                                                                                                                                                                                              |
| EPI_ISL_1624500                                                                                                                                                                                                                                               | Massachusetts State Public Health Laboratory                                                    | Massachusetts State Public Health Laboratory                                              | Andrew Lang, Timelia Fink, Glen Gallagher, Sandra Smole                                                                                                                                                                                                                                                                                                                                                                                                                                                                                                                                                                                                                                                                                                                                                                                                                                                                                                                                                                                          |
| EPI_ISL_1624728, EPI_ISL_1624740                                                                                                                                                                                                                              | WVU Rapid Development Lab                                                                       | WVU and Marshall University Combined Genomics Core Facilities                             | James Denvir, Peter Stoilov, Peter Perrotta, Wesley Kimble, Ryan Percifield                                                                                                                                                                                                                                                                                                                                                                                                                                                                                                                                                                                                                                                                                                                                                                                                                                                                                                                                                                      |
| EPI_ISL_1624857, EPI_ISL_1624862, EPI_ISL_1624868, EPI_ISL_1624908, EPI_ISL_1624926, EPI_ISL_1624931, EPI_ISL_1624936, EPI_ISL_1624937, EPI_ISL_1624939                                                                                                       | QLabs                                                                                           | WVU and Marshall University Combined Genomics Core Facilities                             | James Denvir, Peter Stoilov, Peter Perrotta, Wesley Kimble, Ryan Percifield                                                                                                                                                                                                                                                                                                                                                                                                                                                                                                                                                                                                                                                                                                                                                                                                                                                                                                                                                                      |
| EPI_ISL_1626223                                                                                                                                                                                                                                               | Wisconsin State Laboratory of Hygiene Communicable Disease Division                             | Wisconsin State Laboratory of Hygiene Communicable Disease Division                       | Kelsey R. Florek, Abigail C. Shockey                                                                                                                                                                                                                                                                                                                                                                                                                                                                                                                                                                                                                                                                                                                                                                                                                                                                                                                                                                                                             |
| EPI_ISL_1626578                                                                                                                                                                                                                                               | IN State Department of Health Laboratory Services                                               | IN State Department of Health Laboratory Services                                         | Cassandra Campion, Jamie Yeadon, Brian Pope, Lixia Liu, Kyle Brownlee, Melissa Hindenlang, Ankita Kashikar, Mark Glazier                                                                                                                                                                                                                                                                                                                                                                                                                                                                                                                                                                                                                                                                                                                                                                                                                                                                                                                         |
| EPI_ISL_1626749                                                                                                                                                                                                                                               | Institute of Virology, Biomedical Research Center of the Slovak Academy of Sciences, Bratislava | Faculty of Natural Sciences, Comenius University, Bratislava                              | Viktoria Cabanova, Kristina Borsova, Brona Brejova, Viktoria Honorova, Sabina Fumacova Havlikova, Juraj Kopacek, Martina Lickova, Lubomira Lukacikova, Martina Nebohacova, Monika Slavikova, Tomas Vinar, Jozef Nosek, Boris Klempa                                                                                                                                                                                                                                                                                                                                                                                                                                                                                                                                                                                                                                                                                                                                                                                                              |
| EPI_ISL_1628207                                                                                                                                                                                                                                               | UW Virology Lab                                                                                 | UW Virology Lab                                                                           | Pavitra Roychoudhury, Hong Xie, Lasata Shrestha, Shah Mohamed Bakhsh, Michelle Lin, Noah R. Baker, Sean Ellis, Meei-Li Huang, Keith R. Jerome, Alexander Greninger                                                                                                                                                                                                                                                                                                                                                                                                                                                                                                                                                                                                                                                                                                                                                                                                                                                                               |
| EPI_ISL_1628497, EPI_ISL_1628498                                                                                                                                                                                                                              | University of Mississippi Medical Center, Department of Pathology                               | University of Mississippi Medical Center, Molecular and Genomics Core Facility            | Ashley C. Johnson, Ithiel J. Frame, Krishna K. Ayyalasomayajula, Michael R. Garrett, D. Ashley Robinson                                                                                                                                                                                                                                                                                                                                                                                                                                                                                                                                                                                                                                                                                                                                                                                                                                                                                                                                          |
| EPI_ISL_1632544, EPI_ISL_1632545, EPI_ISL_1632547, EPI_ISL_1632595, EPI_ISL_1632603, EPI_ISL_1632606, EPI_ISL_1632608, EPI_ISL_1632610, EPI_ISL_1632616                                                                                                       | Virginia Division of Consolidated Laboratory Services                                           | Virginia Division of Consolidated Laboratory Services                                     | Virginia DCLS                                                                                                                                                                                                                                                                                                                                                                                                                                                                                                                                                                                                                                                                                                                                                                                                                                                                                                                                                                                                                                    |



|                                                                                                                                                                                                                                                                                                                                                                                                                                                                                                                                                                                                                   |           |                                                                                          |                                                                                                        |                                                                                                                                                                                                                                                                                                                                                                                                                                                        |
|-------------------------------------------------------------------------------------------------------------------------------------------------------------------------------------------------------------------------------------------------------------------------------------------------------------------------------------------------------------------------------------------------------------------------------------------------------------------------------------------------------------------------------------------------------------------------------------------------------------------|-----------|------------------------------------------------------------------------------------------|--------------------------------------------------------------------------------------------------------|--------------------------------------------------------------------------------------------------------------------------------------------------------------------------------------------------------------------------------------------------------------------------------------------------------------------------------------------------------------------------------------------------------------------------------------------------------|
| EPI_ISL_1633438, EPI_ISL_1633439, EPI_ISL_1633440, EPI_ISL_1633441, EPI_ISL_1633442, EPI_ISL_1633443, EPI_ISL_1633446, EPI_ISL_1633449, EPI_ISL_1633450, EPI_ISL_1633453, EPI_ISL_1633454, EPI_ISL_1633455, EPI_ISL_1633459, EPI_ISL_1633461                                                                                                                                                                                                                                                                                                                                                                      | see above | Tokyo Metropolitan Institute of Public Health                                            | Tokyo Metropolitan Institute of Public Health                                                          | Takako Yamazak, Masaki Hayashi, Sanae Tomizawa, Yukino Segawa, Kenji Iida, Eri Satou, Naoko Sakai, Keiko Iwakoshi, Mami Nagashima, Takushi Fujiwara, Takashi Chiba, Kenji Sadamasu                                                                                                                                                                                                                                                                     |
| EPI_ISL_1634165, EPI_ISL_1636043                                                                                                                                                                                                                                                                                                                                                                                                                                                                                                                                                                                  |           | Pandemic Response Lab - NYC                                                              | Pandemic Response Lab, R&D                                                                             | Henry Lee, Michael Hammerling, Melissa Hopkins, Cybill del Castillo, Shinyoung Clair Kang, William Ward, Pradeep Bugga, Sol Rey, Dylan Law, Katharine Nelson, Haiping Hao, Jon Laurent                                                                                                                                                                                                                                                                 |
| EPI_ISL_1638523                                                                                                                                                                                                                                                                                                                                                                                                                                                                                                                                                                                                   |           | MVZ Dr. Eberhard & Partner Dortmund                                                      | Robert Koch Institute                                                                                  | unknown                                                                                                                                                                                                                                                                                                                                                                                                                                                |
| EPI_ISL_1639270                                                                                                                                                                                                                                                                                                                                                                                                                                                                                                                                                                                                   |           | Labor KneiÄYler GmbH & Co. KG                                                            | Robert Koch Institute                                                                                  | unknown                                                                                                                                                                                                                                                                                                                                                                                                                                                |
| EPI_ISL_1640720                                                                                                                                                                                                                                                                                                                                                                                                                                                                                                                                                                                                   |           | MVZ Labor Krone GbR                                                                      | Robert Koch Institute                                                                                  | unknown                                                                                                                                                                                                                                                                                                                                                                                                                                                |
| EPI_ISL_1641632, EPI_ISL_1641684, EPI_ISL_1641782                                                                                                                                                                                                                                                                                                                                                                                                                                                                                                                                                                 |           | SYNLAB MVZ Weiden                                                                        | Robert Koch Institute                                                                                  | unknown                                                                                                                                                                                                                                                                                                                                                                                                                                                |
| EPI_ISL_1643909, EPI_ISL_1643916, EPI_ISL_1643917, EPI_ISL_1643938                                                                                                                                                                                                                                                                                                                                                                                                                                                                                                                                                |           | Eurofins LifeCodexx GmbH                                                                 | Robert Koch Institute                                                                                  | unknown                                                                                                                                                                                                                                                                                                                                                                                                                                                |
| EPI_ISL_1648091                                                                                                                                                                                                                                                                                                                                                                                                                                                                                                                                                                                                   |           | NJDOH, Public Health and Environmental Laboratories                                      | NJ_PHEL                                                                                                | Lindsey Bodnar, Shiv K. Verma, Jacquelyn Deverell, Matthew Scarnati, Dana Woell, Byeong Jeong                                                                                                                                                                                                                                                                                                                                                          |
| EPI_ISL_1648520, EPI_ISL_1648584, EPI_ISL_1648590, EPI_ISL_1648798, EPI_ISL_1648857, EPI_ISL_1648899, EPI_ISL_1648916                                                                                                                                                                                                                                                                                                                                                                                                                                                                                             |           | Quest Diagnostics Incorporated                                                           | Centers for Disease Control and Prevention Division of Viral Diseases, Pathogen Discovery              | Dakota Howard, Dhvani Batra, Peter W. Cook, Kara Moser, Adrian Paskey, Jason Caravas, Benjamin Rambo-Martin, Shatavia Morrison, Christopher Gulvick, Scott Sammons, Yvette Unoarumhi, Darlene Wagner, Matthew Schmeier, S. H. Rosenthal, A. Gerasimova, R. M. Kagan, B. Anderson, M. Hua, Y. Liu, L.E. Bernstein, K.E. Livingston, A. Perez, I. A. Shlyakhter, R. V. Rolando, R. Owen, P. Tanpaiboon, F. Lacbawan, Clinton R. Paden, Duncan MacCannell |
| EPI_ISL_1649000, EPI_ISL_1649002, EPI_ISL_1649083, EPI_ISL_1649113, EPI_ISL_1649151, EPI_ISL_1649152, EPI_ISL_1649183, EPI_ISL_1649203, EPI_ISL_1649284, EPI_ISL_1649366, EPI_ISL_1649404, EPI_ISL_1649418, EPI_ISL_1649460, EPI_ISL_1649500, EPI_ISL_1649501, EPI_ISL_1649520, EPI_ISL_1649528, EPI_ISL_1649565, EPI_ISL_1649567, EPI_ISL_1649763, EPI_ISL_1649848, EPI_ISL_1649919, EPI_ISL_1649942, EPI_ISL_1649965, EPI_ISL_1649975, EPI_ISL_1650080, EPI_ISL_1650112, EPI_ISL_1650239, EPI_ISL_1650280, EPI_ISL_1650525, EPI_ISL_1650545, EPI_ISL_1650562, EPI_ISL_1650582, EPI_ISL_1650737, EPI_ISL_1650983 | see above | Aegis Sciences Corporation                                                               | Centers for Disease Control and Prevention Division of Viral Diseases, Pathogen Discovery              | Dakota Howard, Dhvani Batra, Peter W. Cook, Kara Moser, Adrian Paskey, Jason Caravas, Benjamin Rambo-Martin, Shatavia Morrison, Christopher Gulvick, Scott Sammons, Yvette Unoarumhi, Darlene Wagner, Matthew Schmeier, Cyndi Clark, Patrick Campbell, Rob Case, Vikramsinha Ghorpade, Holly Houdeshell, Ola Kvalvaag, Dillon Nall, Ethan Sanders, Alec Vest, Shaun Westlund, Matthew Hardison, Clinton R. Paden, Duncan MacCannell                    |
| EPI_ISL_1651301, EPI_ISL_1651304                                                                                                                                                                                                                                                                                                                                                                                                                                                                                                                                                                                  |           | GA Department of Public Health                                                           | GA Department of Public Health                                                                         | Stacy Reeves, Jonathan Edwards, Cynthia Dixey, Tonia Parrott, Aliyah Fields, Taylor Smith                                                                                                                                                                                                                                                                                                                                                              |
| EPI_ISL_1651343, EPI_ISL_1651430, EPI_ISL_1651501, EPI_ISL_1651510                                                                                                                                                                                                                                                                                                                                                                                                                                                                                                                                                |           | Florida Bureau of Public Health Laboratories                                             | Florida Bureau of Public Health Laboratories                                                           | Sarah Schmedes, Jason Blanton                                                                                                                                                                                                                                                                                                                                                                                                                          |
| EPI_ISL_1651615                                                                                                                                                                                                                                                                                                                                                                                                                                                                                                                                                                                                   |           | University of Michigan Clinical Microbiology Laboratory                                  | Lauring Lab, University of Michigan, Department of Microbiology and Immunology                         | Valesano                                                                                                                                                                                                                                                                                                                                                                                                                                               |
| EPI_ISL_1652488                                                                                                                                                                                                                                                                                                                                                                                                                                                                                                                                                                                                   |           | Illinois Department of Public Health                                                     | Gagnon Lab, Southern Illinois University                                                               | Keith Gagnon                                                                                                                                                                                                                                                                                                                                                                                                                                           |
| EPI_ISL_1654604                                                                                                                                                                                                                                                                                                                                                                                                                                                                                                                                                                                                   |           | NYU Langone Health                                                                       | Departments of Pathology and Medicine, New York University School of Medicine                          | Adriana Heguy, Dacia Dimartino, Emily Guzman, Christian Marier, Peter Meyn, Sitharam Ramaswami, Gael Westby, Paul Zappile, Yutong Zhang, Paolo Cotzia, Guiqing Wang                                                                                                                                                                                                                                                                                    |
| EPI_ISL_1655075                                                                                                                                                                                                                                                                                                                                                                                                                                                                                                                                                                                                   |           | Fujian Center for Disease Control and Prevention                                         | Fujian Center for Disease Control and Prevention                                                       | Lin Qi, Huang Zhimiao, Weng Yuwei                                                                                                                                                                                                                                                                                                                                                                                                                      |
| EPI_ISL_1656749, EPI_ISL_1656750, EPI_ISL_1656753, EPI_ISL_1656754, EPI_ISL_1656757, EPI_ISL_1656758, EPI_ISL_1656759, EPI_ISL_1656763, EPI_ISL_1656764, EPI_ISL_1656765, EPI_ISL_1656766, EPI_ISL_1656768, EPI_ISL_1656770, EPI_ISL_1656771, EPI_ISL_1656774, EPI_ISL_1656775, EPI_ISL_1656778, EPI_ISL_1656779, EPI_ISL_1656780, EPI_ISL_1656784, EPI_ISL_1656785, EPI_ISL_1656786, EPI_ISL_1656787, EPI_ISL_1656789                                                                                                                                                                                            | see above | Tokyo Metropolitan Institute of Public Health                                            | Tokyo Metropolitan Institute of Public Health                                                          | Masaki Hayashi, Takako Yamazaki, Yumi Ooba , Tomoki Igarashi , Yoshihiro Ohsawa , Takushi Fujiwara, Hirofumi Miyake, Mami Nagashima, Jun Suzuki, Kenji Sadamasu                                                                                                                                                                                                                                                                                        |
| EPI_ISL_1660080, EPI_ISL_1660117                                                                                                                                                                                                                                                                                                                                                                                                                                                                                                                                                                                  |           | Swedish national genomic surveillance program of SARS-CoV-2                              | The Public Health Agency of Sweden                                                                     | Maximilian Riess, Maria Lind Karlberg, Alma Brolund, Swedish national genomic surveillance program of SARS-CoV-2                                                                                                                                                                                                                                                                                                                                       |
| EPI_ISL_1660765, EPI_ISL_1660766, EPI_ISL_1660767                                                                                                                                                                                                                                                                                                                                                                                                                                                                                                                                                                 |           | University of Liège COVID-19 testing center                                              | GIGA Medical Genomics                                                                                  | Keith Durkin, Maria Artesi, Sébastien Bontems, Raphaël Boreux, Bouchra Boujemla, Nathalie Renotte, Cécile Meex, Pierrette Melin, Marie-Pierre Hayette, Vincent Bours                                                                                                                                                                                                                                                                                   |
| EPI_ISL_1662673                                                                                                                                                                                                                                                                                                                                                                                                                                                                                                                                                                                                   |           | Delaware Public Health Lab                                                               | Delaware Public Health Lab                                                                             | Rebecca Savage                                                                                                                                                                                                                                                                                                                                                                                                                                         |
| EPI_ISL_1662770, EPI_ISL_1662802, EPI_ISL_1662829, EPI_ISL_1662884, EPI_ISL_1662892, EPI_ISL_1662998                                                                                                                                                                                                                                                                                                                                                                                                                                                                                                              |           | Johns Hopkins Hospital Department of Pathology                                           | Johns Hopkins Hospital Department of Pathology                                                         | C. Paul Morris, Chun Huai Luo, Adannaya Amadi, Matthew Schwartz, Heba H. Mostafa                                                                                                                                                                                                                                                                                                                                                                       |
| EPI_ISL_1663126                                                                                                                                                                                                                                                                                                                                                                                                                                                                                                                                                                                                   |           | Illinois Department of Public Health                                                     | Illinois Department of Public Health - Chicago Lab                                                     | Vineet K. Dhiman, Ira Heimler                                                                                                                                                                                                                                                                                                                                                                                                                          |
| EPI_ISL_1664390, EPI_ISL_1664394                                                                                                                                                                                                                                                                                                                                                                                                                                                                                                                                                                                  |           | Clinical Molecular Microbiology Laboratory, UNC Hospitals                                | Jeremy Wang                                                                                            | Jeremy Wang, Alexander Rubinsteyn, Colleen Rice, Jason Smedberg, Shawn Hawken, Melissa Miller, Corbin Jones, Robert Hagan                                                                                                                                                                                                                                                                                                                              |
| EPI_ISL_1666078, EPI_ISL_1666146, EPI_ISL_1666147, EPI_ISL_1666417, EPI_ISL_1666419, EPI_ISL_1666477, EPI_ISL_1667091, EPI_ISL_1667309                                                                                                                                                                                                                                                                                                                                                                                                                                                                            |           | Fulgent Genetics                                                                         | Centers for Disease Control and Prevention Division of Viral Diseases, Pathogen Discovery              | Dakota Howard, Dhvani Batra, Peter W. Cook, Kara Moser, Adrian Paskey, Jason Caravas, Benjamin Rambo-Martin, Shatavia Morrison, Christopher Gulvick, Scott Sammons, Yvette Unoarumhi, Darlene Wagner, Matthew Schmeier, Harry Gao, Mickey Li, John Gao, Joseph Fierro, Benafsh Sapra, Becky Tsai, Yan Meng, Doreen Ng, James Xie, Clinton R. Paden, Duncan MacCannell                                                                                  |
| EPI_ISL_1667809, EPI_ISL_1667927, EPI_ISL_1668028, EPI_ISL_1668333                                                                                                                                                                                                                                                                                                                                                                                                                                                                                                                                                |           | Aegis Sciences Corporation                                                               | Centers for Disease Control and Prevention Division of Viral Diseases, Pathogen Discovery              | Dakota Howard, Dhvani Batra, Peter W. Cook, Kara Moser, Adrian Paskey, Jason Caravas, Benjamin Rambo-Martin, Shatavia Morrison, Christopher Gulvick, Scott Sammons, Yvette Unoarumhi, Darlene Wagner, Matthew Schmeier, Cyndi Clark, Patrick Campbell, Rob Case, Vikramsinha Ghorpade, Holly Houdeshell, Ola Kvalvaag, Dillon Nall, Ethan Sanders, Alec Vest, Shaun Westlund, Matthew Hardison, Clinton R. Paden, Duncan MacCannell                    |
| EPI_ISL_1668465, EPI_ISL_1668636, EPI_ISL_1668934, EPI_ISL_1669190                                                                                                                                                                                                                                                                                                                                                                                                                                                                                                                                                |           | Quest Diagnostics Incorporated                                                           | Centers for Disease Control and Prevention Division of Viral Diseases, Pathogen Discovery              | Dakota Howard, Dhvani Batra, Peter W. Cook, Kara Moser, Adrian Paskey, Jason Caravas, Benjamin Rambo-Martin, Shatavia Morrison, Christopher Gulvick, Scott Sammons, Yvette Unoarumhi, Darlene Wagner, Matthew Schmeier, S. H. Rosenthal, A. Gerasimova, R. M. Kagan, B. Anderson, M. Hua, Y. Liu, L.E. Bernstein, K.E. Livingston, A. Perez, I. A. Shlyakhter, R. V. Rolando, R. Owen, P. Tanpaiboon, F. Lacbawan, Clinton R. Paden, Duncan MacCannell |
| EPI_ISL_1669761, EPI_ISL_1669762, EPI_ISL_1669764                                                                                                                                                                                                                                                                                                                                                                                                                                                                                                                                                                 |           | Genome Analysis Center, Yamanashi Central Hospital                                       | Genome Analysis Center, Yamanashi Central Hospital                                                     | Yosuke Hirotsu                                                                                                                                                                                                                                                                                                                                                                                                                                         |
| EPI_ISL_1671116, EPI_ISL_1671117, EPI_ISL_1671118, EPI_ISL_1671119                                                                                                                                                                                                                                                                                                                                                                                                                                                                                                                                                |           | Institute for Laboratory Diagnostics and Microbiology, Klinikum Klagenfurt am Wörthersee | Bergthaler laboratory, CeMM Research Center for Molecular Medicine of the Austrian Academy of Sciences | Lukas Endler, Anna Schedl, Fabian Amman, Petr Triska, Thomas Penz, Benedikt Agerer, Maelle Le Moing, Michael Schuster, Bekir Erguner, Jan Laine, Martin Senekowitsch, Christoph Bock, Andreas Bergthaler                                                                                                                                                                                                                                               |
| EPI_ISL_1671352, EPI_ISL_1671353                                                                                                                                                                                                                                                                                                                                                                                                                                                                                                                                                                                  |           | TEMPUS LABS INC                                                                          | Wadsworth Center, New York State Department of Health                                                  | Kirsten St. George, Daryl M. Lamson, Alexis Russell, Matthew Shudt, Melissa A Leisner, Jonathan Plitnick, Catharine Prussing, Navjot Singh, John Kelly, Erasmus Schneider, Erica Lasek-Nesselquist                                                                                                                                                                                                                                                     |
| EPI_ISL_1671354                                                                                                                                                                                                                                                                                                                                                                                                                                                                                                                                                                                                   |           | ALBANY MEDICAL CENTER                                                                    | Wadsworth Center, New York State Department of Health                                                  | Kirsten St. George, Daryl M. Lamson, Alexis Russell, Matthew Shudt, Melissa A Leisner, Jonathan Plitnick, Catharine Prussing, Navjot Singh, John Kelly, Erasmus Schneider, Erica Lasek-Nesselquist                                                                                                                                                                                                                                                     |
| EPI_ISL_1671512, EPI_ISL_1671513                                                                                                                                                                                                                                                                                                                                                                                                                                                                                                                                                                                  |           | SUNY UPSTATE MEDICAL UNIVERSITY                                                          | Wadsworth Center, New York State Department of Health                                                  | Kirsten St. George, Daryl M. Lamson, Alexis Russell, Matthew Shudt, Melissa A Leisner, Jonathan Plitnick, Catharine Prussing, Navjot Singh, John Kelly, Erasmus Schneider, Erica Lasek-Nesselquist                                                                                                                                                                                                                                                     |
| EPI_ISL_1672267                                                                                                                                                                                                                                                                                                                                                                                                                                                                                                                                                                                                   |           | SYNLAB                                                                                   | GIGA Medical Genomics                                                                                  | Keith Durkin, Maria Artesi, Sébastien Bontems, Raphaël Boreux, Bouchra Boujemla, Nathalie Renotte, Cécile Meex, Pierrette Melin, Marie-Pierre Hayette, Vincent Bours                                                                                                                                                                                                                                                                                   |
| EPI_ISL_1672287                                                                                                                                                                                                                                                                                                                                                                                                                                                                                                                                                                                                   |           | University of Liège COVID-19 testing center                                              | GIGA Medical Genomics                                                                                  | Keith Durkin, Maria Artesi, Sébastien Bontems, Raphaël Boreux, Bouchra Boujemla, Nathalie Renotte, Cécile Meex, Pierrette Melin, Marie-Pierre Hayette, Vincent Bours                                                                                                                                                                                                                                                                                   |

|                                                                                                                |                                                                                                                                                     |                                                                                                                                                     |                                                                                                                                                                                                                                                                                                                                                                                                                                                                                                                                                                                                                                                                                                                                                                                                                                                     |
|----------------------------------------------------------------------------------------------------------------|-----------------------------------------------------------------------------------------------------------------------------------------------------|-----------------------------------------------------------------------------------------------------------------------------------------------------|-----------------------------------------------------------------------------------------------------------------------------------------------------------------------------------------------------------------------------------------------------------------------------------------------------------------------------------------------------------------------------------------------------------------------------------------------------------------------------------------------------------------------------------------------------------------------------------------------------------------------------------------------------------------------------------------------------------------------------------------------------------------------------------------------------------------------------------------------------|
| EPI_ISL_1672288                                                                                                | SYNLAB                                                                                                                                              | GIGA Medical Genomics                                                                                                                               | Vincent Bours<br>Keith Durkin, Maria Artesi, Sébastien Bontems, Raphaël Boreux, Bouchra Boujemla, Nathalie Renotte, Cécile Meex, Pierrette Melin, Marie-Pierre Hayette, Vincent Bours                                                                                                                                                                                                                                                                                                                                                                                                                                                                                                                                                                                                                                                               |
| EPI_ISL_1672383                                                                                                | MD PHL                                                                                                                                              | MD PHL                                                                                                                                              | Maryland Department of Health Laboratories Administration                                                                                                                                                                                                                                                                                                                                                                                                                                                                                                                                                                                                                                                                                                                                                                                           |
| EPI_ISL_675164                                                                                                 | Lighthouse Lab in Alderley Park                                                                                                                     | Wellcome Sanger Institute for the COVID-19 Genomics UK (COG-UK) Consortium                                                                          | Jacquelyn Wynn, Mairead Hyland, The Lighthouse Lab in Alderley Park and Alex Alderton, Roberto Amato, Sonia Goncalves, Ewan Harrison, David K. Jackson, Ian Johnston, Dominic Kwiatkowski, Cordelia Langford, John Sillitoe on behalf of the Wellcome Sanger Institute COVID-19 Surveillance Team                                                                                                                                                                                                                                                                                                                                                                                                                                                                                                                                                   |
| EPI_ISL_736897                                                                                                 | Pathogen Genomics Center, National Institute of Infectious Diseases                                                                                 | Pathogen Genomics Center, National Institute of Infectious Diseases                                                                                 | Tsuyoshi Sekizuka, Kentaro Itokawa, Rina Tanaka, Masanori Hashino, Makoto Kuroda                                                                                                                                                                                                                                                                                                                                                                                                                                                                                                                                                                                                                                                                                                                                                                    |
| EPI_ISL_791161, EPI_ISL_791177                                                                                 | University of Wisconsin-Madison AIDS Vaccine Research Laboratories                                                                                  | University of Wisconsin-Madison AIDS Vaccine Research Laboratories                                                                                  | Gage Moreno, Katarina Braun, et al. AIDS Vaccine Research Laboratories                                                                                                                                                                                                                                                                                                                                                                                                                                                                                                                                                                                                                                                                                                                                                                              |
| EPI_ISL_791346                                                                                                 | Johns Hopkins Hospital Department of Pathology                                                                                                      | Johns Hopkins Hospital Department of Pathology                                                                                                      | C. Paul Morris, Chun Huai Luo, Adannaya Amadi, Nicholas Gallagher, Heba H. Mostafa                                                                                                                                                                                                                                                                                                                                                                                                                                                                                                                                                                                                                                                                                                                                                                  |
| EPI_ISL_806807, EPI_ISL_806808                                                                                 | Gundersen Molecular Diagnostics Laboratory                                                                                                          | Kabara Cancer Research Institute                                                                                                                    | Craig S. Richmond, Paraic A. Kenny                                                                                                                                                                                                                                                                                                                                                                                                                                                                                                                                                                                                                                                                                                                                                                                                                  |
| EPI_ISL_831486                                                                                                 | University of Wisconsin-Madison AIDS Vaccine Research Laboratories                                                                                  | University of Wisconsin-Madison AIDS Vaccine Research Laboratories                                                                                  | Gage Moreno, Katarina Braun, et al. AIDS Vaccine Research Laboratories                                                                                                                                                                                                                                                                                                                                                                                                                                                                                                                                                                                                                                                                                                                                                                              |
| EPI_ISL_860044                                                                                                 | BTC, Khalifa University                                                                                                                             | BTC, Khalifa University                                                                                                                             | Al Safar et al                                                                                                                                                                                                                                                                                                                                                                                                                                                                                                                                                                                                                                                                                                                                                                                                                                      |
| EPI_ISL_861474                                                                                                 | Gundersen Molecular Diagnostics Laboratory                                                                                                          | Kabara Cancer Research Institute                                                                                                                    | Craig S. Richmond, Paraic A. Kenny                                                                                                                                                                                                                                                                                                                                                                                                                                                                                                                                                                                                                                                                                                                                                                                                                  |
| EPI_ISL_862036, EPI_ISL_862037, EPI_ISL_862038                                                                 | Johns Hopkins Hospital Department of Pathology                                                                                                      | Johns Hopkins Hospital Department of Pathology                                                                                                      | C. Paul Morris, Chun Huai Luo, Adannaya Amadi, Matthew Schwartz, Nicholas Gallagher, Heba H. Mostafa                                                                                                                                                                                                                                                                                                                                                                                                                                                                                                                                                                                                                                                                                                                                                |
| EPI_ISL_862670                                                                                                 | New Mexico Department of Health Scientific Laboratory                                                                                               | New Mexico Department of Health Scientific Laboratory                                                                                               | D'eldra Malone, Ellie Johnson, Anastacia Griego-Fisher                                                                                                                                                                                                                                                                                                                                                                                                                                                                                                                                                                                                                                                                                                                                                                                              |
| EPI_ISL_876148                                                                                                 | Massachusetts State Public Health Laboratory                                                                                                        | Massachusetts State Public Health Laboratory                                                                                                        | Andrew Lang, Timelia Fink, Glen Gallagher, Sandra Smole                                                                                                                                                                                                                                                                                                                                                                                                                                                                                                                                                                                                                                                                                                                                                                                             |
| EPI_ISL_876662                                                                                                 | Helix/Illumina                                                                                                                                      | Genomics and Discovery, Respiratory Viruses Branch, Division of Viral Diseases, Centers for Disease Control and Prevention                          | Peter W. Cook,Dhwani Batra,Ben L. Rambo-Martin,Eileen de Feo,Jan Antico,Christine Tran,Matthew Tolentino,Shannon Wickline,Kim Gietzen,Brad Sickler,Jingtao Liu,Eric Allen,Phil Febbo,Summer Galloway,Nicole L. Washington,Simon White,Geraint Levan,Kelly Schiabor Barrett,Elizabeth Cirulli,Alexandre Bolze,Ary Ascencio,Charlotte Rivera-Garcia,Ryan Cho,Jason Nguyen,Sherry Wang,Jimmy Ramirez,Tyler Cassens,Efren Sandoval,Magnus Isaksson,William Lee,David Becker,Marc Laurent,James Lu,Clinton R. Paden,Suxiang Tong,Duncan MacCannell,                                                                                                                                                                                                                                                                                                      |
| EPI_ISL_883003                                                                                                 | Maryland Public Health Laboratory                                                                                                                   | Maryland Public Health Laboratory                                                                                                                   | Maryland Department of Health Laboratories Administration                                                                                                                                                                                                                                                                                                                                                                                                                                                                                                                                                                                                                                                                                                                                                                                           |
| EPI_ISL_883314                                                                                                 | DOHMH Jamaica                                                                                                                                       | New York City Public Health Laboratory                                                                                                              | Jade Wang, et al.                                                                                                                                                                                                                                                                                                                                                                                                                                                                                                                                                                                                                                                                                                                                                                                                                                   |
| EPI_ISL_883348                                                                                                 | DOHMH Corona                                                                                                                                        | New York City Public Health Laboratory                                                                                                              | Jade Wang, et al.                                                                                                                                                                                                                                                                                                                                                                                                                                                                                                                                                                                                                                                                                                                                                                                                                                   |
| EPI_ISL_886790, EPI_ISL_886810, EPI_ISL_887695, EPI_ISL_887901, EPI_ISL_887902, EPI_ISL_887903, EPI_ISL_887904 | Labcorp                                                                                                                                             | Genomics and Discovery, Respiratory Viruses Branch, Division of Viral Diseases, Centers for Disease Control and Prevention                          | Peter W. Cook,Dhwani Batra,Ben L. Rambo-Martin,Summer Galloway,Brian Krueger,Minoo Agarwal,Eyad Almasri,Debbie Boles,Ayla Burns,Nuthawin Charoensri,Oren Cohen,Susan Countryman,Mary Ann Cristobal,Bobbi Croy,Suzanne Dale,Hrushikesh Deshmukh,Amanda Douglas,Vincent Drouillon,Marcia Eisenberg,Howard Engler,Rama Ghatti,Prashant Gupta,Susan Hicks,Jake Humphrey,Lax Iyer,Manoj Jain,Mohan Kolli,Tim Kuphal,Stanley Letovsky,Michael Levandoski,Craig Lukasik,Jonathan Meltzer,Brian Norvell,Mindy Nye,Scott Parker,Christos Petropoulos,John Pruitt,Steven Ragan,Scott Ryan,Mike Sapeta,Jana Schroth,Suresh Babu Selvaraju,Goran Stevovic,Amanda Suchanek,Andrea Throop,Lyndon Tilson,Thomas Urban,Joe Voshell,Kimberly Wagner,Jonathan Williams,Mary Williamson,Qian Zeng,Tricia Zwiefelhofer,Clinton R. Paden,Suxiang Tong,Duncan MacCannell, |
| EPI_ISL_888669                                                                                                 | University of Michigan Clinical Microbiology Laboratory                                                                                             | Lauring Lab, University of Michigan, Department of Microbiology and Immunology                                                                      | Valesano                                                                                                                                                                                                                                                                                                                                                                                                                                                                                                                                                                                                                                                                                                                                                                                                                                            |
| EPI_ISL_890293                                                                                                 | KU Leuven, Rega Institute, Clinical and Epidemiological Virology                                                                                    | KU Leuven, Rega Institute, Clinical and Epidemiological Virology                                                                                    | Tony Wawina-Bokalanga, Bert Vanmechelen, Joan Marti-Carerras, Piet Maes                                                                                                                                                                                                                                                                                                                                                                                                                                                                                                                                                                                                                                                                                                                                                                             |
| EPI_ISL_895012, EPI_ISL_895013                                                                                 | Niigata Prefectural Institute of Public Health and Environmental Sciences                                                                           | Pathogen Genomics Center, National Institute of Infectious Diseases                                                                                 | Tsuyoshi Sekizuka, Kentaro Itokawa, Rina Tanaka, Masanori Hashino, Makoto Kuroda                                                                                                                                                                                                                                                                                                                                                                                                                                                                                                                                                                                                                                                                                                                                                                    |
| EPI_ISL_902908                                                                                                 | Department of Virology and Immunology, University of Helsinki and Helsinki University Hospital, Huslab Finland                                      | Department of Virology, Faculty of Medicine, University of Helsinki, Helsinki, Finland                                                              | Teemu Smura, Ravi Kant, Phuoc Truong, Hussein Alburkat, Hannimari Kallio-Kokko, Jenni Virtanen, Maija Suvanto, Essi Korhonen, Sari Hannula, Harri Kangas, Hanna Liimatainen, Satu Kurkela, Hanna Jarva, Maija Lappalainen, Pekka Ellonen, Olli Vapalahti                                                                                                                                                                                                                                                                                                                                                                                                                                                                                                                                                                                            |
| EPI_ISL_905303                                                                                                 | Dutch COVID-19 response team                                                                                                                        | National Institute for Public Health and the Environment (RIVM)                                                                                     | Adam Meijer, Harry Vennema, Dirk Eggink, Jeroen Cremer, Sharon van den Brink, Bas van der Veer, AnneMarie van den Brandt, Florian Zwagemaker, Dennis Schmitz, Chantal Reusken, on behalf of the national COVID-19 response team                                                                                                                                                                                                                                                                                                                                                                                                                                                                                                                                                                                                                     |
| EPI_ISL_905952, EPI_ISL_906030                                                                                 | OHSU Lab Services Molecular Microbiology Lab                                                                                                        | Oregon SARS-CoV-2 Genome Sequencing Center                                                                                                          | Brendan L. O'Connell, Sally Grindstaff, Kayla Carter, Ruth V. Nichols, Alec J. Hirsch, Donna Hansel, Guang Fan, Xuan, Qin, Daniel N. Streblow, William B. Messer, Andrew C. Adey, Benjamin N. Bimber, Brian J. O'Roak                                                                                                                                                                                                                                                                                                                                                                                                                                                                                                                                                                                                                               |
| EPI_ISL_911760                                                                                                 | Johns Hopkins Hospital Department of Pathology                                                                                                      | Johns Hopkins Hospital Department of Pathology                                                                                                      | C. Paul Morris, Chun Huai Luo, Adannaya Amadi, Matthew Schwartz, Nicholas Gallagher, Heba H. Mostafa                                                                                                                                                                                                                                                                                                                                                                                                                                                                                                                                                                                                                                                                                                                                                |
| EPI_ISL_915343                                                                                                 | Quest Diagnostics                                                                                                                                   | Quest Diagnostics                                                                                                                                   | Rosenthal,S.H., Gerasimova,A., Kagan,R.M., Anderson, B., Hua, M., Liu Y., Bernstein, L.E., Livingston, K.E., Perez, A., Shalhout, D.F., Shlyakhter, I.A., Owen, R., Tanpaiboon, P., Lacbawan, F.                                                                                                                                                                                                                                                                                                                                                                                                                                                                                                                                                                                                                                                    |
| EPI_ISL_925079                                                                                                 | TXDSHS                                                                                                                                              | TXDSHS                                                                                                                                              | Bonnie Oh, Anita Pokharel, James Daniel Bonser, Myong Koag, Chung Wang, Rachel Lee, Grace Kubin, Rashmi Tuladhar, Mayela Pedrueza, Maliha Rahman, Jenny Zhang                                                                                                                                                                                                                                                                                                                                                                                                                                                                                                                                                                                                                                                                                       |
| EPI_ISL_925233                                                                                                 | New Mexico Department of Health Scientific Laboratory                                                                                               | New Mexico Department of Health Scientific Laboratory                                                                                               | Ellie Johnson, Anastacia Griego-Fisher, D'eldra Malone, Jennifer Benoit                                                                                                                                                                                                                                                                                                                                                                                                                                                                                                                                                                                                                                                                                                                                                                             |
| EPI_ISL_925719, EPI_ISL_925720, EPI_ISL_925816                                                                 | Public Health Ontario Laboratory                                                                                                                    | Public Health Ontario Laboratory                                                                                                                    | Vanessa G Allen, Philip Banh, Yao Chen, Richard de Borja, Alireza Eshaghi, Nahuel Fittipaldi, Christine Frantz, Jonathan B Gubbay, Jennifer L Guthrie, Lawrence Heisler, Esha Joshi, Michael Laszloffy, Aimin Li, Michael Cy Li, Dean Maxwell, Sandeep Nagra, Samir N Patel, Jared Simpson, Kartikeyan Sivaraman, Ashleigh Sullivan, Yogi Sundaravadanam, Sarah Teatero, Matthew Watson, Andre Villegas, Sandra Zittermann                                                                                                                                                                                                                                                                                                                                                                                                                          |
| EPI_ISL_930614, EPI_ISL_930631                                                                                 | University of Liège COVID-19 testing center                                                                                                         | GIGA Medical Genomics                                                                                                                               | Keith Durkin, Maria Artesi, Bouchra Boujemla, Emmanuel André, Marc Van Ranst, Fabrice Bureau, Laurent Gillet, Wouter Coppieters, Vincent Bours                                                                                                                                                                                                                                                                                                                                                                                                                                                                                                                                                                                                                                                                                                      |
| EPI_ISL_941282                                                                                                 | Nigeria Centre for Disease Control (NCDC)                                                                                                           | African Centre of Excellence for Genomics of Infectious Diseases (ACEGID), Redeemer's University                                                    | Oluniyi P.E. et al                                                                                                                                                                                                                                                                                                                                                                                                                                                                                                                                                                                                                                                                                                                                                                                                                                  |
| EPI_ISL_942895                                                                                                 | South Eastern Area Laboratory Services (SEALS)                                                                                                      | NSW Health Pathology - Institute of Clinical Pathology and Medical Research; Westmead Hospital; University of Sydney                                | CIDM-PH et al.                                                                                                                                                                                                                                                                                                                                                                                                                                                                                                                                                                                                                                                                                                                                                                                                                                      |
| EPI_ISL_943439                                                                                                 | Dutch COVID-19 response team                                                                                                                        | National Institute for Public Health and the Environment (RIVM)                                                                                     | Adam Meijer, Harry Vennema, Dirk Eggink, Jeroen Cremer, Sharon van den Brink, Bas van der Veer, AnneMarie van den Brandt, Florian Zwagemaker, Dennis Schmitz, Chantal Reusken, on behalf of the national COVID-19 response team                                                                                                                                                                                                                                                                                                                                                                                                                                                                                                                                                                                                                     |
| EPI_ISL_944658, EPI_ISL_944659, EPI_ISL_944660                                                                 | Department of Biochemistry, Cell and Molecular Biology, West African Centre for Cell Biology of Infectious Pathogens (WACCBIP), University of Ghana | Department of Biochemistry, Cell and Molecular Biology, West African Centre for Cell Biology of Infectious Pathogens (WACCBIP), University of Ghana | Morang'a,C.M., Ngoi,J.M., Quansah,E.B., Saïid,S., Amuzu,D.S., Asante,I., Bonney,J.H., Bonney,E., Odoom,J.K., Ndam,N.T., Tei-Maya,F., Adusei-Poku,M., Ofori-Boadu,L., Ampofo,W.K., Amenga-Etego,L.N., Quashie,P., Bediako,Y., Awandare,G.A.                                                                                                                                                                                                                                                                                                                                                                                                                                                                                                                                                                                                          |
| EPI_ISL_949073, EPI_ISL_949075, EPI_ISL_949076                                                                 | Jessa                                                                                                                                               | Jessa                                                                                                                                               | Jessa_cmdLab                                                                                                                                                                                                                                                                                                                                                                                                                                                                                                                                                                                                                                                                                                                                                                                                                                        |
| EPI_ISL_953663                                                                                                 | University Hospitals of Geneva, Laboratory of Virology                                                                                              | HUG, Laboratory of Virology and the Health2030 Genome Center                                                                                        | Samuel Cordey, Ana Rita Goncalves, Laurent Kaiser, Lorenzo Cerutti, Henri Peugeot, Melyssa Elies, Deborah Penet, Keith Harshman, Ioannis Xenarios, Emmanouil Dermitzakis                                                                                                                                                                                                                                                                                                                                                                                                                                                                                                                                                                                                                                                                            |
| EPI_ISL_961171, EPI_ISL_961175                                                                                 | Texas Department of State Health Services                                                                                                           | Texas Department of State Health Services                                                                                                           | Bonnie Oh, Anita Pokharel, James Daniel Bonser, Myong Koag, Chung Wang, Rachel Lee, Grace Kubin, Rashmi Tuladhar, Mayela Pedrueza, Maliha                                                                                                                                                                                                                                                                                                                                                                                                                                                                                                                                                                                                                                                                                                           |

|                                                                                                      |                                                                                                                |                                                                                                                    |                                                                                                                                                                                                                                                                                                                                                                      |
|------------------------------------------------------------------------------------------------------|----------------------------------------------------------------------------------------------------------------|--------------------------------------------------------------------------------------------------------------------|----------------------------------------------------------------------------------------------------------------------------------------------------------------------------------------------------------------------------------------------------------------------------------------------------------------------------------------------------------------------|
| EPI_ISL_965471, EPI_ISL_965472,<br>EPI_ISL_965473                                                    | Synlab                                                                                                         | GIGA Medical Genomics                                                                                              | Rahman, Jenny Zhang<br>Keith Durkin, Maria Artesi, Sébastien Bontems, Raphaël Boreux, Bouchra Boujemla, Cécile Meex, Pierrette Melin, Marie-Pierre Hayette, Vincent Bours                                                                                                                                                                                            |
| EPI_ISL_965871, EPI_ISL_965872<br>EPI_ISL_967768                                                     | Massachusetts State Public Health Laboratory<br>State Laboratories Division, Hawaii State Department of Health | Massachusetts State Public Health Laboratory<br>State Laboratories Division, Hawaii State Department of Health     | Andrew Lang, Timelia Fink, Glen Gallagher, Sandra Smole<br>Pamela O'Brien, Drew Kuwazaki, Ayana Garnet, Razvan Sultana, Edward Desmond                                                                                                                                                                                                                               |
| EPI_ISL_977974<br>EPI_ISL_981088, EPI_ISL_981097,<br>EPI_ISL_981127, EPI_ISL_981132                  | Chiu Laboratory, University of California, San Francisco<br>Johns Hopkins Hospital Department of Pathology     | Chiu Laboratory, University of California, San Francisco<br>Johns Hopkins Hospital Department of Pathology         | Charles Chiu, Xianding (Wayne) Deng, Candace Wang, Venice Servellita, Jill Hacker, Debra Wadford<br>C. Paul Morris, Chun Huai Luo, Adannaya Amadi, Matthew Schwartz, Nicholas Gallagher, Heba H. Mostafa                                                                                                                                                             |
| EPI_ISL_982467, EPI_ISL_982483<br><br>EPI_ISL_983250                                                 | MONTEFIORE MEDICAL CENTER LABORATORIES<br><br>KALEIDA CENTER FOR LABORATORY MEDICINE                           | Wadsworth Center, New York State Department of Health<br><br>Wadsworth Center, New York State Department of Health | Kirsten St. George, Daryl M. Lamson, Alexis Russel, Matthew Shudt, Melissa A Leisner, Jonathan Plitnick, Navjot Singh, John Kelly, Erasmus Schneider,<br>Erica Lasek-Nesselquist<br>Kirsten St. George, Daryl M. Lamson, Alexis Russel, Matthew Shudt, Melissa A Leisner, Jonathan Plitnick, Navjot Singh, John Kelly, Erasmus Schneider,<br>Erica Lasek-Nesselquist |
| EPI_ISL_984774, EPI_ISL_984818,<br>EPI_ISL_984819, EPI_ISL_984899,<br>EPI_ISL_994885, EPI_ISL_995083 | Pandemic Response Lab - NYC                                                                                    | Pandemic Response Lab, R&D                                                                                         | Henry Lee, Michael Hammerling, Melissa Hopkins, Cybill del Castillo, William Ward, Pradeep Bugga, Haiping Hao, Jon Laurent                                                                                                                                                                                                                                           |
